# Supplementary material for: Coupling global models for hydrology and nutrient loading to simulate nitrogen and phosphorus retention in surface water – description of IMAGE–GNM and analysis of performance
Source: Copernicus journal article supplement (doi:10.5194/gmd-8-4045-2015), 2015-12-21
Supplement: Supplementary file 3 [file GMDD_beusen_supplement_cover_letter.docx]

**Supporting information**

**Coupling global models for hydrology and nutrient loading to simulate nitrogen and phosphorus retention in surface water. Description of IMAGE-GNM and analysis of performance**

A.H.W. Beusen1,2, L.P.H. Van Beek3, A.F. Bouwman1,2, J.M. Mogollón1, J.J. Middelburg1

[1] {Department of Earth Sciences – Geochemistry, Faculty of Geosciences, Utrecht University, PO Box 80021, 3508 TA Utrecht, The Netherlands}

[2] {PBL Netherlands Environmental Assessment Agency, P.O. Box 303, 3720 AH Bilthoven, The Netherlands}

[3] {Department of Physical Geography, Faculty of Geosciences, Utrecht University, P.O. Box 80.115, 3508 TC Utrecht, The Netherlands}

Correspondence to: A.H.W. Beusen (arthur.beusen@pbl.nl)

**Agreement**

The data is provided for reproducing the results presented here. Anyone can use these files for noncommercial academic research only. If you want to make a buck off of these files get in touch and we will talk. We would appreciate a short description of what you are planning to do with the data. If you feel that this data set is a major contribution to your research, we would like to be coauthor on any manuscript. If the data is being included in a published manuscript, we would like to see a preprint before submission to make sure the data description is correct.

**Supporting information consists of a compressed file with the following information:**

1. Description of observed concentration data for model validation
2. Model code
3. Model input data for the year 2000
4. Excel file ‘data_all_figures.xlsx’ with all information to reproduce the figures.
5. Comparison of modelled and observed N and P concentrations for all individual stations in the EEA database used in this paper (see Figure 10 in main text for aggregated results).
6. Comparison of modelled and observed N and P concentrations, load and discharge is plotted for 11 stations in the Mississippi river, Ohio river, Red river, Missouri river and Arkansas river. Measurement frequency ranges from 28 per year to 3. Years with less than 6 observations were excluded (USGS_comparison.zip) (see Table 4 in the main text for the RMSE per station).

The directory tree of the decompressed files is presented below.

.

├── data_all_figures.xlsx

├── EEA_river_plots.zip

├── USGS_comparison.zip

├── fix_input

│   ├── Bd-agg.map

│   ├── glwd

│   │   ├── grid0.asc

│   │   ├── grid10.asc

│   │   ├── grid11.asc

│   │   ├── grid12.asc

│   │   ├── grid1.asc

│   │   ├── grid2.asc

│   │   ├── grid3.asc

│   │   ├── grid4.asc

│   │   ├── grid5.asc

│   │   ├── grid6.asc

│   │   ├── grid7.asc

│   │   ├── grid8.asc

│   │   └── grid9.asc

│   ├── gnpp.asc

│   ├── isric

│   │   ├── d_drain.map

│   │   ├── d_oc_t.map

│   │   ├── d_txt_t.map

│   │   ├── s_drain.map

│   │   ├── s_oc_t.map

│   │   ├── s_ph_t.map

│   │   ├── s_txt_t.map

│   │   ├── tawcd.map

│   │   └── tawcs.map

│   ├── litho

│   │   ├── grid0.asc

│   │   ├── grid10.asc

│   │   ├── grid11.asc

│   │   ├── grid12.asc

│   │   ├── grid13.asc

│   │   ├── grid14.asc

│   │   ├── grid15.asc

│   │   ├── grid16.asc

│   │   ├── grid17.asc

│   │   ├── grid18.asc

│   │   ├── grid19.asc

│   │   ├── grid1.asc

│   │   ├── grid2.asc

│   │   ├── grid3.asc

│   │   ├── grid4.asc

│   │   ├── grid5.asc

│   │   ├── grid6.asc

│   │   ├── grid7.asc

│   │   ├── grid8.asc

│   │   ├── grid9.asc

│   │   └── nodatgrid.asc

│   ├── Pcontent.asc

│   ├── slope.map

│   ├── soil_shield

│   │   ├── grid0.asc

│   │   ├── grid1.asc

│   │   ├── grid2.asc

│   │   ├── grid3.asc

│   │   └── grid4.asc

│   └── texture_erosion.vat

├── generalcode

│   └── trunk

│   ├── accuflux.py

│   ├── aggregate.py

│   ├── allocranking.py

│   ├── allocweighing.py

│   ├── areacell.py

│   ├── ascbitmap.py

│   ├── ascraster.py

│   ├── cmd_options_general.py

│   ├── collect_output.py

│   ├── colorset_general.txt

│   ├── discharge.py

│   ├── error.py

│   ├── excel.py

│   ├── general_class.py

│   ├── get_column_of_excel.py

│   ├── get_file_info.py

│   ├── get_sheet_of_excel.py

│   ├── get_versioninfo.py

│   ├── hydraulic_load.py

│   ├── interpolate.py

│   ├── iround.py

│   ├── litho_class.py

│   ├── lu_area.py

│   ├── make_balance_total.py

│   ├── make_colortable.py

│   ├── make_dict_lake.py

│   ├── make_fraction.py

│   ├── mouth.py

│   ├── my_logging.py

│   ├── my_sys.py

│   ├── readexcel.py

│   ├── residence_time.py

│   ├── showimage.py

│   ├── showimg.py

│   ├── simpson.py

│   ├── subgrid_retention.py

│   ├── travel_load.py

│   ├── unffile.py

│   ├── water_specs.py

│   └── write_dict.py

├── GMDD_beusen_supplement_cover_letter.docx

├── GMDD_beusen_description_of_measurement_data.docx

├── N_model

│   └── trunk

│   └── tools

│   ├── accuflux_retention.py

│   ├── cmd_options_n.py

│   ├── history.ini

│   ├── n_deposition.py

│   ├── n_erosion.py

│   ├── n_gnpp.py

│   ├── n_groundwater.py

│   ├── N-model.py

│   ├── nmouth.py

│   ├── n_nowater.py

│   ├── nretention.py

│   ├── n_soil_denitrification.py

│   ├── n_surface_runoff.py

│   ├── n_wetlands.py

│   ├── parameters_history_100.ini

│   └── sgd.py

├── output_history_110

├── P_model

│   └── trunk

│   └── tools

│   ├── accuflux_retention.py

│   ├── cmd_options_p.py

│   ├── erosion.py

│   ├── history.ini

│   ├── parameters_history_100.ini

│   ├── pbackground.py

│   ├── p_gnpp.py

│   ├── P-model.py

│   ├── pmouth.py

│   ├── pretention.py

│   ├── p_surface_runoff.py

│   └── p_wetlands.py

├── README.TXT

├── scen_input

│   └── history_110

│   ├── 2000

│   │   ├── balance_N-NH3_arable.asc

│   │   ├── balance_N-NH3_grs.asc

│   │   ├── balance_N-NH3_nat.asc

│   │   ├── balance_p_arable.asc

│   │   ├── balance_p_grs.asc

│   │   ├── balance_p_nat.asc

│   │   ├── cropmixp.asc

│   │   ├── croppasp.asc

│   │   ├── grasmixp.asc

│   │   ├── graspasp.asc

│   │   ├── landarea.asc

│   │   ├── N_aquaculture.asc

│   │   ├── ndeposition.asc

│   │   ├── Npoint.asc

│   │   ├── P_aquaculture.asc

│   │   ├── Ppoint.asc

│   │   ├── uptake_n_arable.asc

│   │   ├── uptake_n_grs.asc

│   │   ├── uptake_p_arable.asc

│   │   └── uptake_p_grs.asc

│   ├── n_histdir

│   │   ├── Nleaching_1700.asc

│   │   ├── Nleaching_1900.asc

│   │   ├── Nleaching_1905.asc

│   │   ├── Nleaching_1910.asc

│   │   ├── Nleaching_1915.asc

│   │   ├── Nleaching_1920.asc

│   │   ├── Nleaching_1925.asc

│   │   ├── Nleaching_1930.asc

│   │   ├── Nleaching_1935.asc

│   │   ├── Nleaching_1940.asc

│   │   ├── Nleaching_1945.asc

│   │   ├── Nleaching_1950.asc

│   │   ├── Nleaching_1955.asc

│   │   ├── Nleaching_1960.asc

│   │   ├── Nleaching_1965.asc

│   │   ├── Nleaching_1970.asc

│   │   ├── Nleaching_1971.asc

│   │   ├── Nleaching_1972.asc

│   │   ├── Nleaching_1973.asc

│   │   ├── Nleaching_1974.asc

│   │   ├── Nleaching_1975.asc

│   │   ├── Nleaching_1976.asc

│   │   ├── Nleaching_1977.asc

│   │   ├── Nleaching_1978.asc

│   │   ├── Nleaching_1979.asc

│   │   ├── Nleaching_1980.asc

│   │   ├── Nleaching_1981.asc

│   │   ├── Nleaching_1982.asc

│   │   ├── Nleaching_1983.asc

│   │   ├── Nleaching_1984.asc

│   │   ├── Nleaching_1985.asc

│   │   ├── Nleaching_1986.asc

│   │   ├── Nleaching_1987.asc

│   │   ├── Nleaching_1988.asc

│   │   ├── Nleaching_1989.asc

│   │   ├── Nleaching_1990.asc

│   │   ├── Nleaching_1991.asc

│   │   ├── Nleaching_1992.asc

│   │   ├── Nleaching_1993.asc

│   │   ├── Nleaching_1994.asc

│   │   ├── Nleaching_1995.asc

│   │   ├── Nleaching_1996.asc

│   │   ├── Nleaching_1997.asc

│   │   ├── Nleaching_1998.asc

│   │   ├── Nleaching_1999.asc

│   │   ├── Nleaching_2000.asc

│   │   ├── N_top_dgrw_1700.asc

│   │   ├── N_top_dgrw_1900.asc

│   │   ├── N_top_dgrw_1905.asc

│   │   ├── N_top_dgrw_1910.asc

│   │   ├── N_top_dgrw_1915.asc

│   │   ├── N_top_dgrw_1920.asc

│   │   ├── N_top_dgrw_1925.asc

│   │   ├── N_top_dgrw_1930.asc

│   │   ├── N_top_dgrw_1935.asc

│   │   ├── N_top_dgrw_1940.asc

│   │   ├── N_top_dgrw_1945.asc

│   │   ├── N_top_dgrw_1950.asc

│   │   ├── N_top_dgrw_1955.asc

│   │   ├── N_top_dgrw_1960.asc

│   │   ├── N_top_dgrw_1965.asc

│   │   ├── N_top_dgrw_1970.asc

│   │   ├── N_top_dgrw_1971.asc

│   │   ├── N_top_dgrw_1972.asc

│   │   ├── N_top_dgrw_1973.asc

│   │   ├── N_top_dgrw_1974.asc

│   │   ├── N_top_dgrw_1975.asc

│   │   ├── N_top_dgrw_1976.asc

│   │   ├── N_top_dgrw_1977.asc

│   │   ├── N_top_dgrw_1978.asc

│   │   ├── N_top_dgrw_1979.asc

│   │   ├── N_top_dgrw_1980.asc

│   │   ├── N_top_dgrw_1981.asc

│   │   ├── N_top_dgrw_1982.asc

│   │   ├── N_top_dgrw_1983.asc

│   │   ├── N_top_dgrw_1984.asc

│   │   ├── N_top_dgrw_1985.asc

│   │   ├── N_top_dgrw_1986.asc

│   │   ├── N_top_dgrw_1987.asc

│   │   ├── N_top_dgrw_1988.asc

│   │   ├── N_top_dgrw_1989.asc

│   │   ├── N_top_dgrw_1990.asc

│   │   ├── N_top_dgrw_1991.asc

│   │   ├── N_top_dgrw_1992.asc

│   │   ├── N_top_dgrw_1993.asc

│   │   ├── N_top_dgrw_1994.asc

│   │   ├── N_top_dgrw_1995.asc

│   │   ├── N_top_dgrw_1996.asc

│   │   ├── N_top_dgrw_1997.asc

│   │   ├── N_top_dgrw_1998.asc

│   │   ├── N_top_dgrw_1999.asc

│   │   └── N_top_dgrw_2000.asc

│   └── p_histdir

│   ├── P_bal_total_1900.asc

│   ├── P_bal_total_1905.asc

│   ├── P_bal_total_1910.asc

│   ├── P_bal_total_1915.asc

│   ├── P_bal_total_1920.asc

│   ├── P_bal_total_1925.asc

│   ├── P_bal_total_1930.asc

│   ├── P_bal_total_1935.asc

│   ├── P_bal_total_1940.asc

│   ├── P_bal_total_1945.asc

│   ├── P_bal_total_1950.asc

│   ├── P_bal_total_1955.asc

│   ├── P_bal_total_1960.asc

│   ├── P_bal_total_1965.asc

│   ├── P_bal_total_1970.asc

│   ├── P_bal_total_1971.asc

│   ├── P_bal_total_1972.asc

│   ├── P_bal_total_1973.asc

│   ├── P_bal_total_1974.asc

│   ├── P_bal_total_1975.asc

│   ├── P_bal_total_1976.asc

│   ├── P_bal_total_1977.asc

│   ├── P_bal_total_1978.asc

│   ├── P_bal_total_1979.asc

│   ├── P_bal_total_1980.asc

│   ├── P_bal_total_1981.asc

│   ├── P_bal_total_1982.asc

│   ├── P_bal_total_1983.asc

│   ├── P_bal_total_1984.asc

│   ├── P_bal_total_1985.asc

│   ├── P_bal_total_1986.asc

│   ├── P_bal_total_1987.asc

│   ├── P_bal_total_1988.asc

│   ├── P_bal_total_1989.asc

│   ├── P_bal_total_1990.asc

│   ├── P_bal_total_1991.asc

│   ├── P_bal_total_1992.asc

│   ├── P_bal_total_1993.asc

│   ├── P_bal_total_1994.asc

│   ├── P_bal_total_1995.asc

│   ├── P_bal_total_1996.asc

│   ├── P_bal_total_1997.asc

│   ├── P_bal_total_1998.asc

│   ├── P_bal_total_1999.asc

│   ├── P_bal_total_2000.asc

│   ├── Pcontent_1900.asc

│   ├── Pcontent_1905.asc

│   ├── Pcontent_1910.asc

│   ├── Pcontent_1915.asc

│   ├── Pcontent_1920.asc

│   ├── Pcontent_1925.asc

│   ├── Pcontent_1930.asc

│   ├── Pcontent_1935.asc

│   ├── Pcontent_1940.asc

│   ├── Pcontent_1945.asc

│   ├── Pcontent_1950.asc

│   ├── Pcontent_1955.asc

│   ├── Pcontent_1960.asc

│   ├── Pcontent_1965.asc

│   ├── Pcontent_1970.asc

│   ├── Pcontent_1971.asc

│   ├── Pcontent_1972.asc

│   ├── Pcontent_1973.asc

│   ├── Pcontent_1974.asc

│   ├── Pcontent_1975.asc

│   ├── Pcontent_1976.asc

│   ├── Pcontent_1977.asc

│   ├── Pcontent_1978.asc

│   ├── Pcontent_1979.asc

│   ├── Pcontent_1980.asc

│   ├── Pcontent_1981.asc

│   ├── Pcontent_1982.asc

│   ├── Pcontent_1983.asc

│   ├── Pcontent_1984.asc

│   ├── Pcontent_1985.asc

│   ├── Pcontent_1986.asc

│   ├── Pcontent_1987.asc

│   ├── Pcontent_1988.asc

│   ├── Pcontent_1989.asc

│   ├── Pcontent_1990.asc

│   ├── Pcontent_1991.asc

│   ├── Pcontent_1992.asc

│   ├── Pcontent_1993.asc

│   ├── Pcontent_1994.asc

│   ├── Pcontent_1995.asc

│   ├── Pcontent_1996.asc

│   ├── Pcontent_1997.asc

│   ├── Pcontent_1998.asc

│   ├── Pcontent_1999.asc

│   ├── Pcontent_2000.asc

│   ├── Psoilloss_agri_1900.asc

│   ├── Psoilloss_agri_1905.asc

│   ├── Psoilloss_agri_1910.asc

│   ├── Psoilloss_agri_1915.asc

│   ├── Psoilloss_agri_1920.asc

│   ├── Psoilloss_agri_1925.asc

│   ├── Psoilloss_agri_1930.asc

│   ├── Psoilloss_agri_1935.asc

│   ├── Psoilloss_agri_1940.asc

│   ├── Psoilloss_agri_1945.asc

│   ├── Psoilloss_agri_1950.asc

│   ├── Psoilloss_agri_1955.asc

│   ├── Psoilloss_agri_1960.asc

│   ├── Psoilloss_agri_1965.asc

│   ├── Psoilloss_agri_1970.asc

│   ├── Psoilloss_agri_1971.asc

│   ├── Psoilloss_agri_1972.asc

│   ├── Psoilloss_agri_1973.asc

│   ├── Psoilloss_agri_1974.asc

│   ├── Psoilloss_agri_1975.asc

│   ├── Psoilloss_agri_1976.asc

│   ├── Psoilloss_agri_1977.asc

│   ├── Psoilloss_agri_1978.asc

│   ├── Psoilloss_agri_1979.asc

│   ├── Psoilloss_agri_1980.asc

│   ├── Psoilloss_agri_1981.asc

│   ├── Psoilloss_agri_1982.asc

│   ├── Psoilloss_agri_1983.asc

│   ├── Psoilloss_agri_1984.asc

│   ├── Psoilloss_agri_1985.asc

│   ├── Psoilloss_agri_1986.asc

│   ├── Psoilloss_agri_1987.asc

│   ├── Psoilloss_agri_1988.asc

│   ├── Psoilloss_agri_1989.asc

│   ├── Psoilloss_agri_1990.asc

│   ├── Psoilloss_agri_1991.asc

│   ├── Psoilloss_agri_1992.asc

│   ├── Psoilloss_agri_1993.asc

│   ├── Psoilloss_agri_1994.asc

│   ├── Psoilloss_agri_1995.asc

│   ├── Psoilloss_agri_1996.asc

│   ├── Psoilloss_agri_1997.asc

│   ├── Psoilloss_agri_1998.asc

│   ├── Psoilloss_agri_1999.asc

│   └── Psoilloss_agri_2000.asc

└── water_input

└── pcrglobwb_100

├── 2000

│   ├── endo_waterbodyid.asc

│   ├── fldd.asc

│   ├── fldf.asc

│   ├── fracwat.asc

│   ├── qc.asc

│   ├── runoff.asc

│   ├── swarea.asc

│   ├── temperature.asc

│   ├── waterbodyid.asc

│   ├── waterbodyoutlet.asc

│   ├── wld.asc

│   ├── wlf.asc

│   ├── wlq.asc

│   └── wst.asc

├── basin.map

├── cellarea30.asc

├── coast_distance.asc

├── fqgw.map

├── fQsro.map

├── ldd.map

└── mouth.txt
