# Supplementary material for: Coupling global models for hydrology and nutrient loading to simulate nitrogen and phosphorus retention in surface water – description of IMAGE–GNM and analysis of performance
Source: Copernicus journal article supplement (doi:10.5194/gmd-8-4045-2015), 2015-12-21
Supplement: Supplementary file 5 [file data_all_figures.xlsx]

## Sheet: figure 6A
sample_dt	Observation	Year observation	Simulated
1974-10-11	1.1	1.10628	1.56355
1974-11-07	0.9	1.10628	1.56355
1974-12-05	1.2	1.10628	1.56355
1975-01-09	1.5	1.79828	1.76275
1975-02-14	1.9	1.79828	1.76275
1975-03-11	1.5	1.79828	1.76275
1975-04-04	1.4	1.79828	1.76275
1975-05-06	2.2	1.79828	1.76275
1975-07-16	3.3	1.79828	1.76275
1975-07-24	2.6	1.79828	1.76275
1975-08-13	1.5	1.79828	1.76275
1975-09-09	0.8	1.79828	1.76275
1975-10-02	1.5	1.79828	1.76275
1975-11-17	1.2	1.79828	1.76275
1975-12-18	1.1	1.79828	1.76275
1976-01-22	1.8	1.94007	2.08428
1976-02-24	1.6	1.94007	2.08428
1976-03-25	2.4	1.94007	2.08428
1976-04-05	2.3	1.94007	2.08428
1976-04-13	2	1.94007	2.08428
1976-06-02	2.5	1.94007	2.08428
1976-08-14	1.3	1.94007	2.08428
1976-10-27	2	1.94007	2.08428
1976-11-03	1.8	1.94007	2.08428
1977-01-10	1.6	1.75307	2.49757
1977-02-07	1.2	1.75307	2.49757
1977-03-03	2	1.75307	2.49757
1977-04-04	1.8	1.75307	2.49757
1977-05-02	1.7	1.75307	2.49757
1977-06-01	2.1	1.75307	2.49757
1977-07-13	1.6	1.75307	2.49757
1977-08-08	1.1	1.75307	2.49757
1977-09-02	1.7	1.75307	2.49757
1977-10-18	1.8	1.75307	2.49757
1977-11-07	2.2	1.75307	2.49757
1977-12-08	1.7	1.75307	2.49757
1978-01-13	2.8	2.40744	2.20799
1978-02-13	1.9	2.40744	2.20799
1978-03-06	1.7	2.40744	2.20799
1978-04-25	2.8	2.40744	2.20799
1978-05-08	3	2.40744	2.20799
1978-06-05	2.5	2.40744	2.20799
1978-07-12	2.1	2.40744	2.20799
1978-08-15	2.5	2.40744	2.20799
1978-09-14	2.4	2.40744	2.20799
1978-10-23	2	2.40744	2.20799
1978-11-13	1.9	2.40744	2.20799
1979-02-08	1.5	2.179	1.86546
1979-03-06	1.8	2.179	1.86546
1979-05-07	2.5	2.179	1.86546
1979-06-11	2	2.179	1.86546
1979-07-20	2.3	2.179	1.86546
1979-08-06	2.8	2.179	1.86546
1979-09-07	2.4	2.179	1.86546
1979-10-01	2.4	2.179	1.86546
1979-11-02	2.8	2.179	1.86546
1979-12-19	2.4	2.179	1.86546
1980-01-07	2.4	2.51367	1.95865
1980-02-04	2.2	2.51367	1.95865
1980-04-10	2.6	2.51367	1.95865
1980-05-09	2.4	2.51367	1.95865
1980-07-07	4	2.51367	1.95865
1980-08-04	2.2	2.51367	1.95865
1980-09-03	2.2	2.51367	1.95865
1980-10-17	2	2.51367	1.95865
1980-11-13	2	2.51367	1.95865
1980-12-01	2.5	2.51367	1.95865
1981-01-12	2.8	3.18379	2.46488
1981-02-03	2.5	3.18379	2.46488
1981-03-13	3.8	3.18379	2.46488
1981-04-20	2.1	3.18379	2.46488
1981-05-04	3.5	3.18379	2.46488
1981-06-01	4.2	3.18379	2.46488
1981-07-08	3.8	3.18379	2.46488
1981-08-06	2.8	3.18379	2.46488
1981-09-03	3.2	3.18379	2.46488
1981-10-09	1.8	3.18379	2.46488
1981-12-07	2	3.18379	2.46488
1982-02-17	2.4	2.86951	2.14144
1982-04-09	2.9	2.86951	2.14144
1982-06-10	3.3	2.86951	2.14144
1982-08-05	4.2	2.86951	2.14144
1982-10-07	2.1	2.86951	2.14144
1982-12-11	2.6	2.86951	2.14144
1983-04-26	3	2.71878	1.80817
1983-06-22	2.7	2.71878	1.80817
1983-08-15	2.4	2.71878	1.80817
1983-10-03	0.9	2.71878	1.80817
1983-12-06	2.2	2.71878	1.80817
1984-02-14	2.5	3.11038	2.01351
1984-04-16	4.1	3.11038	2.01351
1984-06-26	3.5	3.11038	2.01351
1984-08-21	2.6	3.11038	2.01351
1984-10-15	1.6	3.11038	2.01351
1984-12-03	2.1	3.11038	2.01351
1985-02-13	2.2	2.64273	2.11975
1985-04-11	3.7	2.64273	2.11975
1985-06-06	2.9	2.64273	2.11975
1985-08-13	2.2	2.64273	2.11975
1985-10-01	1.1	2.64273	2.11975
1985-12-03	2.3	2.64273	2.11975
1986-02-18	2.7	3.04594	2.20132
1986-04-15	3.4	3.04594	2.20132
1986-06-16	3.1	3.04594	2.20132
1986-08-12	3.2	3.04594	2.20132
1987-10-20	1.9	1.79628	2.14172
1987-11-17	1.8	1.79628	2.14172
1987-12-02	1.4	1.79628	2.14172
1988-01-05	2.4	2.13121	2.15361
1988-02-22	2.4	2.13121	2.15361
1988-03-15	3	2.13121	2.15361
1988-04-05	2.4	2.13121	2.15361
1988-05-10	2.3	2.13121	2.15361
1988-06-09	1.2	2.13121	2.15361
1988-08-02	1	2.13121	2.15361
1988-10-12	1.4	2.13121	2.15361
1988-12-22	1.6	2.13121	2.15361
1989-02-15	2.3	1.82	1.93052
1989-03-30	1.7	1.82	1.93052
1989-06-26	1.6	1.82	1.93052
1989-08-08	1.3	1.82	1.93052
1989-10-06	2	1.82	1.93052
1990-02-20	2.4	2.32052	1.85874
1990-04-17	2.2	2.32052	1.85874
1990-06-25	2	2.32052	1.85874
1990-08-14	3.6	2.32052	1.85874
1990-10-30	2.2	2.32052	1.85874
1990-12-12	1.8	2.32052	1.85874
1991-02-25	2.5	2.76613	1.70947
1991-04-02	2.8	2.76613	1.70947
1991-06-17	3.8	2.76613	1.70947
1991-09-23	1.5	2.76613	1.70947
1991-11-05	1.2	2.76613	1.70947
1991-12-10	2.4	2.76613	1.70947
1992-02-26	2.6	2.54541	2.25346
1992-05-14	3.6	2.54541	2.25346
1992-05-26	3.1	2.54541	2.25346
1992-06-17	1.9	2.54541	2.25346
1992-08-18	2.4	2.54541	2.25346
1992-10-14	2	2.54541	2.25346
1992-12-15	2.8	2.54541	2.25346
1993-01-26	2.4	2.25243	1.92925
1993-03-03	2.2	2.25243	1.92925
1993-04-20	2	2.25243	1.92925
1993-05-24	2	2.25243	1.92925
1993-06-22	2.9	2.25243	1.92925
1993-08-23	2.1	2.25243	1.92925
1993-11-08	2.4	2.25243	1.92925
1994-01-24	1.7	1.68875	1.96879
1994-03-14	1.9	1.68875	1.96879
1994-06-28	2.1	1.68875	1.96879
1994-08-30	1.5	1.68875	1.96879
1994-10-20	1.2	1.68875	1.96879
1995-01-23	1.6	2.20233	2.26786
1995-02-21	2	2.20233	2.26786
1995-04-24	3	2.20233	2.26786
1995-06-14	1.9	2.20233	2.26786
1995-08-07	2.1	2.20233	2.26786
1995-10-12	1.1	2.20233	2.26786
1995-10-17	1.3	2.20233	2.26786
1995-12-06	2.1	2.20233	2.26786
1996-02-07	2.6	1.92894	2.40106
1996-03-27	1.5	1.92894	2.40106
1996-04-16	1.8	1.92894	2.40106
1996-05-01	2.2	1.92894	2.40106
1996-05-17	1.7	1.92894	2.40106
1996-05-31	1.5	1.92894	2.40106
1996-06-11	2.1	1.92894	2.40106
1996-06-21	2.6	1.92894	2.40106
1996-06-25	2.6	1.92894	2.40106
1996-07-23	2.8	1.92894	2.40106
1996-09-03	1.2	1.92894	2.40106
1996-09-17	1.2	1.92894	2.40106
1996-11-25	1.1	1.92894	2.40106
1997-01-15	1.9	1.72464	2.09687
1997-02-03	1.9	1.72464	2.09687
1997-02-20	1.8	1.72464	2.09687
1997-03-14	1.5	1.72464	2.09687
1997-03-26	1.7	1.72464	2.09687
1997-04-08	1.7	1.72464	2.09687
1997-04-24	2	1.72464	2.09687
1997-05-06	2	1.72464	2.09687
1997-06-09	1.9	1.72464	2.09687
1997-06-19	2.3	1.72464	2.09687
1997-07-09	1.7	1.72464	2.09687
1997-08-04	1.7	1.72464	2.09687
1997-08-26	1.4	1.72464	2.09687
1997-09-23	1.1	1.72464	2.09687
1997-11-17	1.2	1.72464	2.09687
1997-12-16	1.4	1.72464	2.09687
1998-01-28	1.8	2.06048	1.98907
1998-02-27	1.8	2.06048	1.98907
1998-03-18	2.1	2.06048	1.98907
1998-04-30	2.4	2.06048	1.98907
1998-05-13	2.2	2.06048	1.98907
1998-05-28	2.2	2.06048	1.98907
1998-06-09	2.7	2.06048	1.98907
1998-06-25	3	2.06048	1.98907
1998-07-09	3	2.06048	1.98907
1998-07-30	2.5	2.06048	1.98907
1998-08-19	1.2	2.06048	1.98907
1998-11-18	1.7	2.06048	1.98907
1998-12-08	2.3	2.06048	1.98907
1999-01-12	1.7	2.33158	2.16338
1999-02-10	2.1	2.33158	2.16338
1999-03-15	2.3	2.33158	2.16338
1999-03-30	1.9	2.33158	2.16338
1999-04-19	1.6	2.33158	2.16338
1999-04-28	2.8	2.33158	2.16338
1999-05-06	3.6	2.33158	2.16338
1999-05-26	2.9	2.33158	2.16338
1999-06-10	3.7	2.33158	2.16338
1999-06-24	3.4	2.33158	2.16338
1999-07-21	2.7	2.33158	2.16338
1999-08-05	2.4	2.33158	2.16338
1999-09-14	1.4	2.33158	2.16338
1999-11-11	1.2	2.33158	2.16338
1999-12-01	1.5	2.33158	2.16338
2000-01-27	1.6	2.00189	2.6846
2000-02-17	1.6	2.00189	2.6846
2000-03-14	2.2	2.00189	2.6846
2000-03-29	2.1	2.00189	2.6846
2000-04-12	1.7	2.00189	2.6846
2000-05-10	1.7	2.00189	2.6846
2000-05-23	2.3	2.00189	2.6846
2000-06-06	1.7	2.00189	2.6846
2000-07-18	3.5	2.00189	2.6846
2000-08-25	1.6	2.00189	2.6846
2000-09-21	1.2	2.00189	2.6846
2000-11-28	1.8	2.00189	2.6846
2000-12-14	1.7	2.00189	2.6846
2001-01-24	3.1	2.46422	#N/A
2001-02-27	2.6	2.46422	#N/A
2001-03-14	2.4	2.46422	#N/A
2001-04-02	1.8	2.46422	#N/A
2001-04-16	3.1	2.46422	#N/A
2001-04-23	3.2	2.46422	#N/A
2001-05-07	3.4	2.46422	#N/A
2001-05-21	3.7	2.46422	#N/A
2001-06-25	3.6	2.46422	#N/A
2001-07-10	3.6	2.46422	#N/A
2001-07-18	2.9	2.46422	#N/A
2001-08-27	1.5	2.46422	#N/A
2001-09-19	0.99	2.46422	#N/A
2001-10-30	1.3	2.46422	#N/A
2001-12-18	1.6	2.46422	#N/A
2002-01-22	1.8	1.80959	#N/A
2002-02-04	1.9	1.80959	#N/A
2002-02-18	1.8	1.80959	#N/A
2002-03-13	2.4	1.80959	#N/A
2002-03-25	2.3	1.80959	#N/A
2002-04-10	1.5	1.80959	#N/A
2002-04-22	1.8	1.80959	#N/A
2002-05-07	2.2	1.80959	#N/A
2002-05-28	1.9	1.80959	#N/A
2002-08-05	1.7	1.80959	#N/A
2002-08-19	1.2	1.80959	#N/A
2002-09-09	1.4	1.80959	#N/A
2002-11-12	1.6	1.80959	#N/A
2003-01-14	1.8	1.73417	#N/A
2003-01-28	1.7	1.73417	#N/A
2003-02-12	1.7	1.73417	#N/A
2003-02-24	1.7	1.73417	#N/A
2003-03-10	1.4	1.73417	#N/A
2003-03-24	1.6	1.73417	#N/A
2003-04-15	1.9	1.73417	#N/A
2003-04-29	1.5	1.73417	#N/A
2003-05-12	1.8	1.73417	#N/A
2003-05-27	1.9	1.73417	#N/A
2003-06-16	2.1	1.73417	#N/A
2003-07-14	1.8	1.73417	#N/A
2003-08-12	2.1	1.73417	#N/A
2003-09-23	1.3	1.73417	#N/A
2003-10-27	1.2	1.73417	#N/A
2003-12-09	1.8	1.73417	#N/A
2004-01-13	1.8	2.00644	#N/A
2004-01-29	1.9	2.00644	#N/A
2004-02-17	1.5	2.00644	#N/A
2004-03-02	1.5	2.00644	#N/A
2004-03-16	2.5	2.00644	#N/A
2004-03-30	2.2	2.00644	#N/A
2004-05-06	1.6	2.00644	#N/A
2004-05-18	1.6	2.00644	#N/A
2004-06-08	3.4	2.00644	#N/A
2004-06-22	3.1	2.00644	#N/A
2004-07-20	2.4	2.00644	#N/A
2004-08-17	1.7	2.00644	#N/A
2004-09-14	1.6	2.00644	#N/A
2004-10-26	1.5	2.00644	#N/A
2004-11-16	1.8	2.00644	#N/A
2004-12-21	1.7	2.00644	#N/A
2005-02-02	1.8	1.97409	#N/A
2005-03-22	2.1	1.97409	#N/A
2005-04-13	2.1	1.97409	#N/A
2005-04-27	2	1.97409	#N/A
2005-05-10	2.5	1.97409	#N/A
2005-05-24	2.1	1.97409	#N/A
2005-06-14	3.3	1.97409	#N/A
2005-07-12	2.7	1.97409	#N/A
2005-08-10	1.8	1.97409	#N/A
2005-09-07	1.6	1.97409	#N/A
2005-10-11	1.1	1.97409	#N/A
2005-11-16	1.8	1.97409	#N/A
2006-01-10	1.8	2.33296	#N/A
2006-02-14	2.2	2.33296	#N/A
2006-03-15	2.1	2.33296	#N/A
2006-04-05	2.5	2.33296	#N/A
2006-04-18	2.9	2.33296	#N/A
2006-05-09	3.3	2.33296	#N/A
2006-05-31	3.8	2.33296	#N/A
2006-06-14	3.3	2.33296	#N/A
2006-06-26	2.9	2.33296	#N/A
2006-07-17	2.7	2.33296	#N/A
2006-08-21	1.3	2.33296	#N/A
2006-09-19	1.5	2.33296	#N/A
2006-10-18	1.5	2.33296	#N/A
2006-11-13	1.9	2.33296	#N/A
2007-01-23	2.3	2.57933	#N/A
2007-02-26	2.1	2.57933	#N/A
2007-03-19	2.3	2.57933	#N/A
2007-04-02	3.3	2.57933	#N/A
2007-04-16	3.2	2.57933	#N/A
2007-04-30	3	2.57933	#N/A
2007-05-14	4	2.57933	#N/A
2007-06-11	2.7	2.57933	#N/A
2007-06-27	3	2.57933	#N/A
2007-07-25	2.2	2.57933	#N/A
2007-08-13	1.5	2.57933	#N/A
2007-08-29	1.6	2.57933	#N/A
2007-11-07	2.7	2.57933	#N/A
2007-12-11	2.4	2.57933	#N/A
2008-02-11	2.9	2.26632	#N/A
2008-03-10	2.3	2.26632	#N/A
2008-04-07	1.7	2.26632	#N/A
2008-05-05	2	2.26632	#N/A
2008-05-27	2.3	2.26632	#N/A
2008-06-09	2.2	2.26632	#N/A
2008-06-23	3.3	2.26632	#N/A
2008-07-08	3.3	2.26632	#N/A
2008-08-18	1.9	2.26632	#N/A
2008-10-20	1.5	2.26632	#N/A
2008-11-17	1.8	2.26632	#N/A
2009-01-19	2.5	2.04406	#N/A
2009-02-03	2.3	2.04406	#N/A
2009-03-02	2.6	2.04406	#N/A
2009-04-06	2.6	2.04406	#N/A
2009-04-23	2.1	2.04406	#N/A
2009-05-04	2.2	2.04406	#N/A
2009-05-20	1.9	2.04406	#N/A
2009-06-01	1.7	2.04406	#N/A
2009-06-18	2	2.04406	#N/A
2009-08-13	1.9	2.04406	#N/A
2009-10-08	1.4	2.04406	#N/A
2009-12-02	2	2.04406	#N/A
2010-01-12	1.7	2.15946	#N/A
2010-02-16	1.7	2.15946	#N/A
2010-02-23	1.7	2.15946	#N/A
2010-03-11	1.8	2.15946	#N/A
2010-03-22	2.4	2.15946	#N/A
2010-04-07	2.6	2.15946	#N/A
2010-04-21	2.6	2.15946	#N/A
2010-05-05	2.7	2.15946	#N/A
2010-05-19	1.8	2.15946	#N/A
2010-06-02	2.2	2.15946	#N/A
2010-06-16	2.6	2.15946	#N/A
2010-08-11	2.4	2.15946	#N/A
2010-10-27	2.2	2.15946	#N/A
2010-12-08	2	2.15946	#N/A
2011-01-10	2.2	2.24725	#N/A
2011-02-09	2.3	2.24725	#N/A
2011-02-22	2.3	2.24725	#N/A
2011-03-08	3.6	2.24725	#N/A
2011-03-21	2.5	2.24725	#N/A
2011-04-06	2.1	2.24725	#N/A
2011-04-20	2.4	2.24725	#N/A
2011-06-27	2.7	2.24725	#N/A
2011-07-11	2.6	2.24725	#N/A
2011-07-25	2.2	2.24725	#N/A
2011-08-22	1.7	2.24725	#N/A
2011-10-24	1.2	2.24725	#N/A
2011-12-06	1.8	2.24725	#N/A
2012-01-17	1.6	1.60368	#N/A
2012-02-06	1.7	1.60368	#N/A
2012-02-22	1.8	1.60368	#N/A
2012-03-05	1.6	1.60368	#N/A
2012-03-19	1.6	1.60368	#N/A
2012-04-02	1.5	1.60368	#N/A
2012-04-16	1.5	1.60368	#N/A
2012-04-30	1.6	1.60368	#N/A
2012-05-14	2	1.60368	#N/A
2012-06-11	2.1	1.60368	#N/A
2012-06-25	2.4	1.60368	#N/A
2012-08-06	1.2	1.60368	#N/A
2012-10-22	0.98	1.60368	#N/A
2012-12-03	1.3	1.60368	#N/A
2013-01-15	1.7	2.20123	#N/A
2013-02-05	1.6	2.20123	#N/A
2013-02-18	1.9	2.20123	#N/A
2013-03-04	2.1	2.20123	#N/A
2013-03-18	2.1	2.20123	#N/A
2013-04-08	2.1	2.20123	#N/A
2013-04-22	2.2	2.20123	#N/A
2013-05-06	3.1	2.20123	#N/A
2013-05-20	2.3	2.20123	#N/A
2013-06-03	2.7	2.20123	#N/A
2013-06-17	3.4	2.20123	#N/A
2013-07-15	3.4	2.20123	#N/A
2013-07-30	2.3	2.20123	#N/A
2013-08-19	1.6	2.20123	#N/A

## Sheet: figure 6BC
Year	Simulation	Observation	Residue
1974	1.56355	1.10628	-0.457269
1975	1.76275	1.79828	0.0355369
1976	2.08428	1.94007	-0.144218
1977	2.49757	1.75307	-0.744497
1978	2.20799	2.40744	0.199453
1979	1.86546	2.179	0.313542
1980	1.95865	2.51367	0.555024
1981	2.46488	3.18379	0.718912
1982	2.14144	2.86951	0.728064
1983	1.80817	2.71878	0.910617
1984	2.01351	3.11038	1.09687
1985	2.11975	2.64273	0.522983
1986	2.20132	3.04594	0.844616
1987	2.14172	1.79628	-0.345439
1988	2.15361	2.13121	-0.0223939
1989	1.93052	1.82	-0.110515
1990	1.85874	2.32052	0.461782
1991	1.70947	2.76613	1.05667
1992	2.25346	2.54541	0.291951
1993	1.92925	2.25243	0.323184
1994	1.96879	1.68875	-0.280047
1995	2.26786	2.20233	-0.0655266
1996	2.40106	1.92894	-0.472119
1997	2.09687	1.72464	-0.372224
1998	1.98907	2.06048	0.0714168
1999	2.16338	2.33158	0.168196
2000	2.6846	2.00189	-0.682704

## Sheet: figure 6D
datum	Observation	Year observation	Simulation
1970-01-12	7.9	5.63972	4.59549
1970-01-19	7.2	5.63972	4.59549
1970-01-29	11	5.63972	4.59549
1970-02-03	7.5	5.63972	4.59549
1970-02-14	6.3	5.63972	4.59549
1970-02-18	5.1	5.63972	4.59549
1970-02-24	8.9	5.63972	4.59549
1970-03-03	5.3	5.63972	4.59549
1970-03-12	6.3	5.63972	4.59549
1970-03-17	7.1	5.63972	4.59549
1970-03-22	5.9	5.63972	4.59549
1970-03-31	4.8	5.63972	4.59549
1970-04-10	5.3	5.63972	4.59549
1970-04-14	5.2	5.63972	4.59549
1970-04-19	4.1	5.63972	4.59549
1970-05-06	4.5	5.63972	4.59549
1970-05-22	4.3	5.63972	4.59549
1970-05-28	4.6	5.63972	4.59549
1970-06-04	5	5.63972	4.59549
1970-06-10	4.5	5.63972	4.59549
1970-06-19	4.6	5.63972	4.59549
1970-06-25	3.5	5.63972	4.59549
1970-07-01	4.3	5.63972	4.59549
1970-07-09	4.2	5.63972	4.59549
1970-07-14	4.1	5.63972	4.59549
1970-07-28	4.6	5.63972	4.59549
1970-08-05	4.6	5.63972	4.59549
1970-08-10	4.8	5.63972	4.59549
1970-08-19	4.8	5.63972	4.59549
1970-08-28	3.9	5.63972	4.59549
1970-09-01	4.4	5.63972	4.59549
1970-09-10	5.3	5.63972	4.59549
1970-09-15	5.9	5.63972	4.59549
1970-09-23	5.3	5.63972	4.59549
1970-09-29	6.2	5.63972	4.59549
1970-10-05	5.9	5.63972	4.59549
1970-10-13	5.8	5.63972	4.59549
1970-10-18	5.3	5.63972	4.59549
1970-10-28	6.7	5.63972	4.59549
1970-11-07	6	5.63972	4.59549
1970-11-11	7.9	5.63972	4.59549
1970-11-16	5.9	5.63972	4.59549
1970-11-23	6.7	5.63972	4.59549
1970-12-02	6.2	5.63972	4.59549
1970-12-10	6.4	5.63972	4.59549
1970-12-19	5.7	5.63972	4.59549
1970-12-21	6.6	5.63972	4.59549
1970-12-29	6.5	5.63972	4.59549
1971-01-07	8.2	7.1884	6.33358
1971-01-13	8.3	7.1884	6.33358
1971-01-22	8.9	7.1884	6.33358
1971-01-28	7.9	7.1884	6.33358
1971-02-01	6.3	7.1884	6.33358
1971-02-10	7.3	7.1884	6.33358
1971-02-18	8.7	7.1884	6.33358
1971-02-25	6.4	7.1884	6.33358
1971-03-06	8.5	7.1884	6.33358
1971-03-10	9.3	7.1884	6.33358
1971-03-16	5.5	7.1884	6.33358
1971-03-24	8.9	7.1884	6.33358
1971-03-31	6.7	7.1884	6.33358
1971-04-05	7.6	7.1884	6.33358
1971-04-17	7.7	7.1884	6.33358
1971-04-22	7.8	7.1884	6.33358
1971-04-29	7.3	7.1884	6.33358
1971-05-05	7.7	7.1884	6.33358
1971-05-14	7	7.1884	6.33358
1971-05-18	7.6	7.1884	6.33358
1971-05-26	6.9	7.1884	6.33358
1971-06-02	8.3	7.1884	6.33358
1971-06-11	7.2	7.1884	6.33358
1971-06-16	6.1	7.1884	6.33358
1971-06-22	5.4	7.1884	6.33358
1971-06-30	5.7	7.1884	6.33358
1971-07-04	4.9	7.1884	6.33358
1971-07-15	5.7	7.1884	6.33358
1971-07-20	5.3	7.1884	6.33358
1971-07-26	9.6	7.1884	6.33358
1971-08-02	4.3	7.1884	6.33358
1971-08-20	6.4	7.1884	6.33358
1971-08-25	5.9	7.1884	6.33358
1971-08-29	6.7	7.1884	6.33358
1971-09-08	5.5	7.1884	6.33358
1971-09-13	6.4	7.1884	6.33358
1971-09-20	6.5	7.1884	6.33358
1971-09-29	7.4	7.1884	6.33358
1971-10-04	8.4	7.1884	6.33358
1971-10-16	8.5	7.1884	6.33358
1971-10-20	8.7	7.1884	6.33358
1971-10-25	8.7	7.1884	6.33358
1971-11-02	10	7.1884	6.33358
1971-11-09	10	7.1884	6.33358
1971-11-15	9.8	7.1884	6.33358
1971-11-30	8.1	7.1884	6.33358
1971-12-09	8.5	7.1884	6.33358
1971-12-22	8.1	7.1884	6.33358
1971-12-27	7.4	7.1884	6.33358
1972-01-04	6.9	7.10918	6.34634
1972-01-11	8.8	7.10918	6.34634
1972-01-17	8.8	7.10918	6.34634
1972-01-26	9.9	7.10918	6.34634
1972-02-01	10	7.10918	6.34634
1972-02-09	14.5	7.10918	6.34634
1972-02-17	9.1	7.10918	6.34634
1972-02-23	8.8	7.10918	6.34634
1972-03-15	9.9	7.10918	6.34634
1972-03-22	10	7.10918	6.34634
1972-03-27	9.4	7.10918	6.34634
1972-04-04	8.2	7.10918	6.34634
1972-04-11	7.6	7.10918	6.34634
1972-04-20	6.5	7.10918	6.34634
1972-04-26	6.6	7.10918	6.34634
1972-05-03	7.7	7.10918	6.34634
1972-05-18	7.9	7.10918	6.34634
1972-05-24	6.6	7.10918	6.34634
1972-05-31	7.4	7.10918	6.34634
1972-06-10	6	7.10918	6.34634
1972-06-15	5.5	7.10918	6.34634
1972-06-23	5.8	7.10918	6.34634
1972-06-28	5.5	7.10918	6.34634
1972-07-08	5.2	7.10918	6.34634
1972-07-19	5	7.10918	6.34634
1972-07-25	5.8	7.10918	6.34634
1972-07-30	4.9	7.10918	6.34634
1972-08-10	5.3	7.10918	6.34634
1972-08-18	5.9	7.10918	6.34634
1972-08-23	5.8	7.10918	6.34634
1972-08-27	5.4	7.10918	6.34634
1972-09-05	5.6	7.10918	6.34634
1972-09-10	3.5	7.10918	6.34634
1972-09-20	8.5	7.10918	6.34634
1972-10-05	7.6	7.10918	6.34634
1972-10-12	9.5	7.10918	6.34634
1972-10-18	11.6	7.10918	6.34634
1972-10-28	10.4	7.10918	6.34634
1972-11-02	11.5	7.10918	6.34634
1972-11-06	6.6	7.10918	6.34634
1972-11-15	8.8	7.10918	6.34634
1972-11-29	5.4	7.10918	6.34634
1972-12-09	6.7	7.10918	6.34634
1972-12-13	7.6	7.10918	6.34634
1972-12-21	6.8	7.10918	6.34634
1973-01-05	8.4	6.67756	5.78217
1973-01-10	9.9	6.67756	5.78217
1973-01-15	9.3	6.67756	5.78217
1973-01-25	10	6.67756	5.78217
1973-02-07	10	6.67756	5.78217
1973-02-14	10	6.67756	5.78217
1973-02-22	8.1	6.67756	5.78217
1973-03-01	7.8	6.67756	5.78217
1973-03-07	8	6.67756	5.78217
1973-03-13	7.52	6.67756	5.78217
1973-03-22	9	6.67756	5.78217
1973-03-31	7.74	6.67756	5.78217
1973-04-04	6.9	6.67756	5.78217
1973-04-12	6.9	6.67756	5.78217
1973-04-16	5.8	6.67756	5.78217
1973-04-25	6.2	6.67756	5.78217
1973-05-01	6.1	6.67756	5.78217
1973-05-07	6.1	6.67756	5.78217
1973-05-16	4.2	6.67756	5.78217
1973-05-25	4.6	6.67756	5.78217
1973-05-28	4.9	6.67756	5.78217
1973-06-04	5	6.67756	5.78217
1973-06-14	4.2	6.67756	5.78217
1973-06-20	5.2	6.67756	5.78217
1973-06-25	4.7	6.67756	5.78217
1973-07-03	3.8	6.67756	5.78217
1973-07-12	5	6.67756	5.78217
1973-07-15	5.2	6.67756	5.78217
1973-07-25	5.3	6.67756	5.78217
1973-08-02	4.8	6.67756	5.78217
1973-08-08	5.3	6.67756	5.78217
1973-08-15	5	6.67756	5.78217
1973-08-22	5.4	6.67756	5.78217
1973-08-30	4.8	6.67756	5.78217
1973-09-06	10.7	6.67756	5.78217
1973-09-10	6	6.67756	5.78217
1973-09-19	6	6.67756	5.78217
1973-09-29	7.3	6.67756	5.78217
1973-10-04	6.4	6.67756	5.78217
1973-10-09	9.9	6.67756	5.78217
1973-10-17	7.8	6.67756	5.78217
1973-10-27	7.3	6.67756	5.78217
1973-11-01	6.7	6.67756	5.78217
1973-11-09	8	6.67756	5.78217
1973-11-14	8.8	6.67756	5.78217
1973-11-18	7.7	6.67756	5.78217
1973-11-29	6.4	6.67756	5.78217
1973-12-07	7.4	6.67756	5.78217
1973-12-12	9.1	6.67756	5.78217
1973-12-21	6.3	6.67756	5.78217
1973-12-27	7.3	6.67756	5.78217
1974-01-05	7.2	6.73405	5.42061
1974-01-15	8.8	6.73405	5.42061
1974-01-19	7.6	6.73405	5.42061
1974-01-24	6.5	6.73405	5.42061
1974-02-01	6.9	6.73405	5.42061
1974-02-05	8.5	6.73405	5.42061
1974-02-15	6.6	6.73405	5.42061
1974-02-20	7.3	6.73405	5.42061
1974-03-02	7	6.73405	5.42061
1974-03-05	8.2	6.73405	5.42061
1974-03-14	10.5	6.73405	5.42061
1974-03-20	8.3	6.73405	5.42061
1974-03-27	7.1	6.73405	5.42061
1974-04-02	7.3	6.73405	5.42061
1974-04-08	7.2	6.73405	5.42061
1974-04-18	8.1	6.73405	5.42061
1974-04-21	7.3	6.73405	5.42061
1974-05-01	9.6	6.73405	5.42061
1974-05-06	9	6.73405	5.42061
1974-05-16	8.4	6.73405	5.42061
1974-05-22	8.4	6.73405	5.42061
1974-05-29	7.6	6.73405	5.42061
1974-06-07	7	6.73405	5.42061
1974-06-13	8.7	6.73405	5.42061
1974-06-19	5.7	6.73405	5.42061
1974-06-26	6.1	6.73405	5.42061
1974-07-05	6.6	6.73405	5.42061
1974-07-10	7.2	6.73405	5.42061
1974-07-15	5.2	6.73405	5.42061
1974-07-23	5.6	6.73405	5.42061
1974-07-30	5.5	6.73405	5.42061
1974-08-07	5.4	6.73405	5.42061
1974-08-17	5.1	6.73405	5.42061
1974-08-21	5.5	6.73405	5.42061
1974-08-29	5.4	6.73405	5.42061
1974-09-05	6	6.73405	5.42061
1974-09-10	6.3	6.73405	5.42061
1974-09-18	6.1	6.73405	5.42061
1974-09-22	6.7	6.73405	5.42061
1974-09-30	7.4	6.73405	5.42061
1974-10-08	6.1	6.73405	5.42061
1974-10-14	7.2	6.73405	5.42061
1974-10-24	6.8	6.73405	5.42061
1974-10-29	6.4	6.73405	5.42061
1974-11-06	5.9	6.73405	5.42061
1974-11-13	5.7	6.73405	5.42061
1974-11-21	6.3	6.73405	5.42061
1974-11-25	5.9	6.73405	5.42061
1974-12-03	5.8	6.73405	5.42061
1974-12-10	5.7	6.73405	5.42061
1974-12-15	5.7	6.73405	5.42061
1975-01-07	5.3	5.88358	4.79194
1975-01-08	5.7	5.88358	4.79194
1975-01-17	5.7	5.88358	4.79194
1975-01-21	6.4	5.88358	4.79194
1975-01-28	6.75	5.88358	4.79194
1975-02-04	4.9	5.88358	4.79194
1975-02-14	6.2	5.88358	4.79194
1975-02-18	6.8	5.88358	4.79194
1975-02-24	6.4	5.88358	4.79194
1975-03-05	7.6	5.88358	4.79194
1975-03-10	7.25	5.88358	4.79194
1975-03-19	7.3	5.88358	4.79194
1975-03-25	7.7	5.88358	4.79194
1975-04-02	6.5	5.88358	4.79194
1975-04-16	6.6	5.88358	4.79194
1975-04-25	5.2	5.88358	4.79194
1975-05-01	5.5	5.88358	4.79194
1975-05-10	5.8	5.88358	4.79194
1975-05-15	5.4	5.88358	4.79194
1975-05-24	5.4	5.88358	4.79194
1975-05-28	5.9	5.88358	4.79194
1975-06-05	5.4	5.88358	4.79194
1975-06-09	5	5.88358	4.79194
1975-06-15	5.4	5.88358	4.79194
1975-06-23	4.7	5.88358	4.79194
1975-06-29	5.5	5.88358	4.79194
1975-07-10	5	5.88358	4.79194
1975-07-15	4.5	5.88358	4.79194
1975-07-21	5.7	5.88358	4.79194
1975-07-31	4.4	5.88358	4.79194
1975-08-07	4.1	5.88358	4.79194
1975-08-11	4.1	5.88358	4.79194
1975-08-19	7	5.88358	4.79194
1975-08-27	5.3	5.88358	4.79194
1975-09-02	4.4	5.88358	4.79194
1975-09-12	4.6	5.88358	4.79194
1975-09-16	4.9	5.88358	4.79194
1975-09-25	5.3	5.88358	4.79194
1975-10-02	5.8	5.88358	4.79194
1975-10-11	5.6	5.88358	4.79194
1975-10-15	7	5.88358	4.79194
1975-10-22	6.4	5.88358	4.79194
1975-10-30	8	5.88358	4.79194
1975-11-05	7.6	5.88358	4.79194
1975-11-12	7.7	5.88358	4.79194
1975-11-17	8.9	5.88358	4.79194
1975-11-27	6.6	5.88358	4.79194
1975-11-30	7.5	5.88358	4.79194
1975-12-10	6.9	5.88358	4.79194
1975-12-18	7.1	5.88358	4.79194
1975-12-23	8.2	5.88358	4.79194
1976-01-04	8.7	7.25836	6.42098
1976-01-08	8.9	7.25836	6.42098
1976-01-13	8.41	7.25836	6.42098
1976-01-21	8.3	7.25836	6.42098
1976-02-01	7.5	7.25836	6.42098
1976-02-05	8.1	7.25836	6.42098
1976-02-09	7.4	7.25836	6.42098
1976-02-18	7.6	7.25836	6.42098
1976-02-25	7.3	7.25836	6.42098
1976-03-04	7.2	7.25836	6.42098
1976-03-14	7.3	7.25836	6.42098
1976-03-17	7.9	7.25836	6.42098
1976-03-27	8.4	7.25836	6.42098
1976-04-01	8.5	7.25836	6.42098
1976-04-08	7.8	7.25836	6.42098
1976-04-14	7.4	7.25836	6.42098
1976-04-23	7.2	7.25836	6.42098
1976-04-26	7	7.25836	6.42098
1976-05-06	7.6	7.25836	6.42098
1976-05-12	7.3	7.25836	6.42098
1976-05-22	6.5	7.25836	6.42098
1976-05-25	6.7	7.25836	6.42098
1976-06-05	6.14	7.25836	6.42098
1976-06-09	5.5	7.25836	6.42098
1976-06-19	5.6	7.25836	6.42098
1976-06-23	7	7.25836	6.42098
1976-07-01	6.1	7.25836	6.42098
1976-07-06	5.4	7.25836	6.42098
1976-07-16	7.7	7.25836	6.42098
1976-07-20	5.9	7.25836	6.42098
1976-07-26	6.7	7.25836	6.42098
1976-08-03	5.2	7.25836	6.42098
1976-08-10	6.5	7.25836	6.42098
1976-08-17	6.4	7.25836	6.42098
1976-08-25	6.65	7.25836	6.42098
1976-08-31	7.6	7.25836	6.42098
1976-09-07	6.7	7.25836	6.42098
1976-09-14	7.6	7.25836	6.42098
1976-09-22	6.3	7.25836	6.42098
1976-09-29	7.9	7.25836	6.42098
1976-10-05	6.55	7.25836	6.42098
1976-10-14	6.7	7.25836	6.42098
1976-10-18	6.5	7.25836	6.42098
1976-10-27	7.1	7.25836	6.42098
1976-11-05	7.8	7.25836	6.42098
1976-11-11	8.5	7.25836	6.42098
1976-11-15	7.45	7.25836	6.42098
1976-11-24	8.2	7.25836	6.42098
1976-12-02	8.4	7.25836	6.42098
1976-12-09	7.1	7.25836	6.42098
1976-12-15	6.9	7.25836	6.42098
1976-12-22	7.2	7.25836	6.42098
1977-01-06	8.7	6.18916	5.0461
1977-01-11	8.9	6.18916	5.0461
1977-01-22	8.5	6.18916	5.0461
1977-01-25	8.3	6.18916	5.0461
1977-02-05	7.7	6.18916	5.0461
1977-02-09	8.5	6.18916	5.0461
1977-02-14	6.6	6.18916	5.0461
1977-02-23	7.3	6.18916	5.0461
1977-03-05	6.4	6.18916	5.0461
1977-03-09	6.3	6.18916	5.0461
1977-03-16	6.4	6.18916	5.0461
1977-03-23	6.9	6.18916	5.0461
1977-03-30	7.1	6.18916	5.0461
1977-04-06	7.7	6.18916	5.0461
1977-04-12	6	6.18916	5.0461
1977-04-20	6.2	6.18916	5.0461
1977-04-25	5.45	6.18916	5.0461
1977-05-04	5.3	6.18916	5.0461
1977-05-10	4.7	6.18916	5.0461
1977-05-17	5.7	6.18916	5.0461
1977-05-26	5	6.18916	5.0461
1977-06-01	5.6	6.18916	5.0461
1977-06-10	5.16	6.18916	5.0461
1977-06-15	5.63	6.18916	5.0461
1977-06-21	4.98	6.18916	5.0461
1977-06-29	5.26	6.18916	5.0461
1977-07-07	4.46	6.18916	5.0461
1977-07-13	5.85	6.18916	5.0461
1977-07-22	5.08	6.18916	5.0461
1977-07-27	4.9	6.18916	5.0461
1977-08-02	4.7	6.18916	5.0461
1977-08-10	4.46	6.18916	5.0461
1977-08-21	4.69	6.18916	5.0461
1977-08-24	5.34	6.18916	5.0461
1977-09-04	4.58	6.18916	5.0461
1977-09-07	4.67	6.18916	5.0461
1977-09-18	4.76	6.18916	5.0461
1977-09-21	5.36	6.18916	5.0461
1977-09-26	5.36	6.18916	5.0461
1977-10-05	6.58	6.18916	5.0461
1977-10-15	6.72	6.18916	5.0461
1977-10-19	6.73	6.18916	5.0461
1977-10-26	6.52	6.18916	5.0461
1977-11-02	6.88	6.18916	5.0461
1977-11-09	7.86	6.18916	5.0461
1977-11-16	6.83	6.18916	5.0461
1977-11-21	5.92	6.18916	5.0461
1977-11-30	5.85	6.18916	5.0461
1977-12-09	6.54	6.18916	5.0461
1977-12-14	6.95	6.18916	5.0461
1977-12-23	6.49	6.18916	5.0461
1977-12-29	6.67	6.18916	5.0461
1978-01-05	6.3	5.85263	4.88693
1978-01-11	6.5	5.85263	4.88693
1978-01-17	6.82	5.85263	4.88693
1978-01-25	7.92	5.85263	4.88693
1978-02-03	6.73	5.85263	4.88693
1978-02-08	6.79	5.85263	4.88693
1978-02-17	7.12	5.85263	4.88693
1978-02-22	7.72	5.85263	4.88693
1978-03-02	5.97	5.85263	4.88693
1978-03-08	5.52	5.85263	4.88693
1978-03-13	5.9	5.85263	4.88693
1978-03-22	5.95	5.85263	4.88693
1978-03-29	5.1	5.85263	4.88693
1978-04-05	5.17	5.85263	4.88693
1978-04-10	5.31	5.85263	4.88693
1978-04-19	5.9	5.85263	4.88693
1978-04-24	6.5	5.85263	4.88693
1978-05-10	5.52	5.85263	4.88693
1978-05-17	5.87	5.85263	4.88693
1978-05-27	7	5.85263	4.88693
1978-05-31	5.59	5.85263	4.88693
1978-06-11	4.85	5.85263	4.88693
1978-06-14	4.74	5.85263	4.88693
1978-06-21	4.55	5.85263	4.88693
1978-06-28	4.91	5.85263	4.88693
1978-07-04	4.99	5.85263	4.88693
1978-07-12	5.14	5.85263	4.88693
1978-07-18	4.08	5.85263	4.88693
1978-07-26	4.11	5.85263	4.88693
1978-07-31	4.64	5.85263	4.88693
1978-08-08	4.93	5.85263	4.88693
1978-08-19	4.03	5.85263	4.88693
1978-08-23	4.24	5.85263	4.88693
1978-09-01	4.79	5.85263	4.88693
1978-09-06	5.43	5.85263	4.88693
1978-09-16	5.67	5.85263	4.88693
1978-09-20	5.64	5.85263	4.88693
1978-09-27	6	5.85263	4.88693
1978-10-04	6.64	5.85263	4.88693
1978-10-12	5.86	5.85263	4.88693
1978-10-18	6.19	5.85263	4.88693
1978-10-29	6.54	5.85263	4.88693
1978-11-01	7.22	5.85263	4.88693
1978-11-11	7.58	5.85263	4.88693
1978-11-15	7.29	5.85263	4.88693
1978-11-23	7.84	5.85263	4.88693
1978-11-29	8.59	5.85263	4.88693
1978-12-10	8.95	5.85263	4.88693
1978-12-13	9.21	5.85263	4.88693
1978-12-22	7.05	5.85263	4.88693
1978-12-28	7.82	5.85263	4.88693
1979-01-02	8.08	6.01176	4.97226
1979-01-11	6.46	6.01176	4.97226
1979-01-17	6.96	6.01176	4.97226
1979-01-25	8.08	6.01176	4.97226
1979-01-31	8.17	6.01176	4.97226
1979-02-06	7.43	6.01176	4.97226
1979-02-19	5.67	6.01176	4.97226
1979-02-26	6.53	6.01176	4.97226
1979-03-05	7.25	6.01176	4.97226
1979-03-12	6.48	6.01176	4.97226
1979-03-20	5.18	6.01176	4.97226
1979-03-28	6	6.01176	4.97226
1979-04-06	5.72	6.01176	4.97226
1979-04-11	5.99	6.01176	4.97226
1979-04-21	6.54	6.01176	4.97226
1979-04-25	6.49	6.01176	4.97226
1979-05-06	5.99	6.01176	4.97226
1979-05-09	5.5	6.01176	4.97226
1979-05-14	5.29	6.01176	4.97226
1979-05-21	5.61	6.01176	4.97226
1979-05-31	4.89	6.01176	4.97226
1979-06-06	5.26	6.01176	4.97226
1979-06-16	4.74	6.01176	4.97226
1979-06-20	4.92	6.01176	4.97226
1979-06-26	4.6	6.01176	4.97226
1979-07-04	4.73	6.01176	4.97226
1979-07-11	4.47	6.01176	4.97226
1979-07-18	5.65	6.01176	4.97226
1979-07-29	5.55	6.01176	4.97226
1979-08-01	5.85	6.01176	4.97226
1979-08-10	6.13	6.01176	4.97226
1979-08-15	5.93	6.01176	4.97226
1979-08-25	5.65	6.01176	4.97226
1979-08-29	5.61	6.01176	4.97226
1979-09-07	5.75	6.01176	4.97226
1979-09-12	5.81	6.01176	4.97226
1979-09-23	6.77	6.01176	4.97226
1979-09-26	6.74	6.01176	4.97226
1979-10-03	5.9	6.01176	4.97226
1979-10-10	7.83	6.01176	4.97226
1979-10-15	6.48	6.01176	4.97226
1979-10-24	6.58	6.01176	4.97226
1979-11-02	6.83	6.01176	4.97226
1979-11-07	7.04	6.01176	4.97226
1979-11-13	5.75	6.01176	4.97226
1979-11-21	4.95	6.01176	4.97226
1979-11-28	6.04	6.01176	4.97226
1979-12-05	6.88	6.01176	4.97226
1979-12-12	6.7	6.01176	4.97226
1979-12-19	5.56	6.01176	4.97226
1979-12-29	5.63	6.01176	4.97226
1980-01-04	5.93	5.65512	5.09381
1980-01-09	6.6	5.65512	5.09381
1980-01-19	6.79	5.65512	5.09381
1980-01-23	7.36	5.65512	5.09381
1980-02-01	6.08	5.65512	5.09381
1980-02-06	6.46	5.65512	5.09381
1980-02-14	4.92	5.65512	5.09381
1980-02-20	5.5	5.65512	5.09381
1980-02-26	5.98	5.65512	5.09381
1980-03-05	7.05	5.65512	5.09381
1980-03-11	7.48	5.65512	5.09381
1980-03-19	7.49	5.65512	5.09381
1980-03-25	7.38	5.65512	5.09381
1980-04-02	6.92	5.65512	5.09381
1980-04-08	5.32	5.65512	5.09381
1980-04-16	6.19	5.65512	5.09381
1980-04-24	6.16	5.65512	5.09381
1980-05-01	6.35	5.65512	5.09381
1980-05-07	5.88	5.65512	5.09381
1980-05-12	5.51	5.65512	5.09381
1980-05-22	5.37	5.65512	5.09381
1980-05-28	5.58	5.65512	5.09381
1980-06-05	5.35	5.65512	5.09381
1980-06-11	5.43	5.65512	5.09381
1980-06-19	4.81	5.65512	5.09381
1980-06-25	4.56	5.65512	5.09381
1980-06-30	4.48	5.65512	5.09381
1980-07-09	3.91	5.65512	5.09381
1980-07-16	4.19	5.65512	5.09381
1980-07-23	4.01	5.65512	5.09381
1980-07-28	4.06	5.65512	5.09381
1980-08-06	3.84	5.65512	5.09381
1980-08-11	4.6	5.65512	5.09381
1980-08-20	4.61	5.65512	5.09381
1980-08-28	4.55	5.65512	5.09381
1980-09-03	4.99	5.65512	5.09381
1980-09-11	5.35	5.65512	5.09381
1980-09-17	5.82	5.65512	5.09381
1980-09-25	6.02	5.65512	5.09381
1980-10-01	6.34	5.65512	5.09381
1980-10-06	6.42	5.65512	5.09381
1980-10-15	6.82	5.65512	5.09381
1980-10-23	5.7	5.65512	5.09381
1980-10-29	5.47	5.65512	5.09381
1980-11-05	5.69	5.65512	5.09381
1980-11-12	6.58	5.65512	5.09381
1980-11-20	7.15	5.65512	5.09381
1980-11-26	6.87	5.65512	5.09381
1980-12-04	7.27	5.65512	5.09381
1980-12-10	7.23	5.65512	5.09381
1980-12-18	7.32	5.65512	5.09381
1980-12-22	6.33	5.65512	5.09381
1981-01-07	6.58	5.41814	4.63226
1981-01-15	6.6	5.41814	4.63226
1981-01-21	6.54	5.41814	4.63226
1981-01-29	6.77	5.41814	4.63226
1981-02-04	7.25	5.41814	4.63226
1981-02-12	6.38	5.41814	4.63226
1981-02-18	6.45	5.41814	4.63226
1981-02-26	7	5.41814	4.63226
1981-03-04	7.84	5.41814	4.63226
1981-03-12	6.45	5.41814	4.63226
1981-03-18	5.14	5.41814	4.63226
1981-03-26	5.33	5.41814	4.63226
1981-04-01	4.92	5.41814	4.63226
1981-04-09	4.75	5.41814	4.63226
1981-04-15	5.17	5.41814	4.63226
1981-04-23	5.18	5.41814	4.63226
1981-04-28	5.53	5.41814	4.63226
1981-05-07	5.7	5.41814	4.63226
1981-05-13	5.82	5.41814	4.63226
1981-05-21	5.79	5.41814	4.63226
1981-05-26	5.88	5.41814	4.63226
1981-06-04	5.36	5.41814	4.63226
1981-06-10	5	5.41814	4.63226
1981-06-18	5.09	5.41814	4.63226
1981-06-24	4.98	5.41814	4.63226
1981-07-02	5.72	5.41814	4.63226
1981-07-08	5.66	5.41814	4.63226
1981-07-16	5	5.41814	4.63226
1981-07-21	4.79	5.41814	4.63226
1981-07-30	3.73	5.41814	4.63226
1981-08-05	3.92	5.41814	4.63226
1981-08-13	4.82	5.41814	4.63226
1981-08-19	4.48	5.41814	4.63226
1981-08-27	4.61	5.41814	4.63226
1981-09-02	5.34	5.41814	4.63226
1981-09-10	5.83	5.41814	4.63226
1981-09-16	5.58	5.41814	4.63226
1981-09-24	5.38	5.41814	4.63226
1981-09-30	5.71	5.41814	4.63226
1981-10-08	4.66	5.41814	4.63226
1981-10-14	5.22	5.41814	4.63226
1981-10-22	4.4	5.41814	4.63226
1981-10-28	3.99	5.41814	4.63226
1981-11-05	4.34	5.41814	4.63226
1981-11-11	4.74	5.41814	4.63226
1981-11-19	5.64	5.41814	4.63226
1981-11-25	6.34	5.41814	4.63226
1981-12-03	6.11	5.41814	4.63226
1981-12-09	5.74	5.41814	4.63226
1981-12-17	4.8	5.41814	4.63226
1981-12-23	4.66	5.41814	4.63226
1981-12-30	5.07	5.41814	4.63226
1982-01-06	5.2	5.06405	4.67352
1982-01-13	#N/A	5.06405	4.67352
1982-01-14	4.42	5.06405	4.67352
1982-01-20	4.69	5.06405	4.67352
1982-01-28	5.7	5.06405	4.67352
1982-02-03	5.53	5.06405	4.67352
1982-02-10	5.3	5.06405	4.67352
1982-02-17	5.75	5.06405	4.67352
1982-02-25	6.44	5.06405	4.67352
1982-03-03	6.7	5.06405	4.67352
1982-03-10	6.55	5.06405	4.67352
1982-03-17	6.18	5.06405	4.67352
1982-03-25	5	5.06405	4.67352
1982-03-31	6.09	5.06405	4.67352
1982-04-07	5.84	5.06405	4.67352
1982-04-14	5.23	5.06405	4.67352
1982-04-22	5.72	5.06405	4.67352
1982-04-28	6.21	5.06405	4.67352
1982-05-06	6.41	5.06405	4.67352
1982-05-12	5.59	5.06405	4.67352
1982-05-26	4.63	5.06405	4.67352
1982-06-03	4.61	5.06405	4.67352
1982-06-09	4.19	5.06405	4.67352
1982-06-16	3.87	5.06405	4.67352
1982-06-23	3.91	5.06405	4.67352
1982-07-01	4.01	5.06405	4.67352
1982-07-07	4.16	5.06405	4.67352
1982-07-15	4.03	5.06405	4.67352
1982-07-21	4.26	5.06405	4.67352
1982-07-29	4.52	5.06405	4.67352
1982-08-04	4.06	5.06405	4.67352
1982-08-12	4.02	5.06405	4.67352
1982-08-18	4.03	5.06405	4.67352
1982-08-26	4.1	5.06405	4.67352
1982-09-01	4.53	5.06405	4.67352
1982-09-09	4.56	5.06405	4.67352
1982-09-15	4.43	5.06405	4.67352
1982-09-23	4.73	5.06405	4.67352
1982-09-29	4.75	5.06405	4.67352
1982-10-07	4.19	5.06405	4.67352
1982-10-13	5.37	5.06405	4.67352
1982-10-21	4.44	5.06405	4.67352
1982-10-27	4.72	5.06405	4.67352
1982-11-04	5.27	5.06405	4.67352
1982-11-10	5.97	5.06405	4.67352
1982-11-18	5.74	5.06405	4.67352
1982-11-24	5.26	5.06405	4.67352
1982-12-02	5.58	5.06405	4.67352
1982-12-08	6.34	5.06405	4.67352
1982-12-16	5.85	5.06405	4.67352
1982-12-22	4.92	5.06405	4.67352
1982-12-30	4.53	5.06405	4.67352
1983-01-05	5.53	5.363	4.84484
1983-01-13	5.06	5.363	4.84484
1983-01-19	5.35	5.363	4.84484
1983-01-27	5.93	5.363	4.84484
1983-02-02	5.94	5.363	4.84484
1983-02-10	5.25	5.363	4.84484
1983-02-24	6.48	5.363	4.84484
1983-03-02	6.53	5.363	4.84484
1983-03-10	6.17	5.363	4.84484
1983-03-16	6.69	5.363	4.84484
1983-03-24	5.74	5.363	4.84484
1983-03-30	5.29	5.363	4.84484
1983-04-07	5.51	5.363	4.84484
1983-04-13	4.98	5.363	4.84484
1983-04-21	4.49	5.363	4.84484
1983-04-27	4.86	5.363	4.84484
1983-05-03	5.05	5.363	4.84484
1983-05-10	4.92	5.363	4.84484
1983-05-19	4.5	5.363	4.84484
1983-05-25	4.44	5.363	4.84484
1983-06-02	4.19	5.363	4.84484
1983-06-08	4.38	5.363	4.84484
1983-06-16	#N/A	5.363	4.84484
1983-06-22	4.48	5.363	4.84484
1983-06-30	5.02	5.363	4.84484
1983-07-06	4.85	5.363	4.84484
1983-07-14	4.76	5.363	4.84484
1983-07-20	4.94	5.363	4.84484
1983-07-28	5.23	5.363	4.84484
1983-08-03	4.98	5.363	4.84484
1983-08-11	4.85	5.363	4.84484
1983-08-17	4.82	5.363	4.84484
1983-08-25	5.21	5.363	4.84484
1983-08-31	5.89	5.363	4.84484
1983-09-08	5.1	5.363	4.84484
1983-09-14	5.6	5.363	4.84484
1983-09-22	4.55	5.363	4.84484
1983-09-28	5.03	5.363	4.84484
1983-10-06	6.11	5.363	4.84484
1983-10-12	6.4	5.363	4.84484
1983-10-20	6.46	5.363	4.84484
1983-10-26	6.22	5.363	4.84484
1983-11-03	7.35	5.363	4.84484
1983-11-09	7.91	5.363	4.84484
1983-11-17	8.39	5.363	4.84484
1983-11-23	8.74	5.363	4.84484
1983-12-07	6.7	5.363	4.84484
1983-12-15	6.98	5.363	4.84484
1983-12-21	7.95	5.363	4.84484
1983-12-29	7.09	5.363	4.84484
1984-01-04	7.28	5.99192	5.1695
1984-01-11	7.29	5.99192	5.1695
1984-01-18	7.87	5.99192	5.1695
1984-01-25	6.72	5.99192	5.1695
1984-02-01	6.53	5.99192	5.1695
1984-02-08	6.74	5.99192	5.1695
1984-02-15	5.68	5.99192	5.1695
1984-02-22	6.46	5.99192	5.1695
1984-02-29	7.16	5.99192	5.1695
1984-03-07	7.3	5.99192	5.1695
1984-03-14	7.77	5.99192	5.1695
1984-03-21	8.07	5.99192	5.1695
1984-03-28	7.23	5.99192	5.1695
1984-04-04	6.88	5.99192	5.1695
1984-04-11	6.73	5.99192	5.1695
1984-04-18	6.51	5.99192	5.1695
1984-04-25	6.38	5.99192	5.1695
1984-05-02	6.06	5.99192	5.1695
1984-05-09	5.54	5.99192	5.1695
1984-05-16	5.62	5.99192	5.1695
1984-05-23	5.71	5.99192	5.1695
1984-05-29	6.06	5.99192	5.1695
1984-06-06	5.16	5.99192	5.1695
1984-06-13	5.44	5.99192	5.1695
1984-06-20	5.6	5.99192	5.1695
1984-06-27	6.47	5.99192	5.1695
1984-07-04	4.89	5.99192	5.1695
1984-07-11	4.92	5.99192	5.1695
1984-07-18	4.88	5.99192	5.1695
1984-07-25	5.3	5.99192	5.1695
1984-08-01	5.11	5.99192	5.1695
1984-08-08	4.8	5.99192	5.1695
1984-08-15	5.09	5.99192	5.1695
1984-08-22	4.76	5.99192	5.1695
1984-08-29	5.02	5.99192	5.1695
1984-09-05	5.56	5.99192	5.1695
1984-09-12	4.97	5.99192	5.1695
1984-09-19	5.16	5.99192	5.1695
1984-09-26	4.54	5.99192	5.1695
1984-10-03	4.11	5.99192	5.1695
1984-10-10	4.65	5.99192	5.1695
1984-10-17	4.65	5.99192	5.1695
1984-10-24	5.63	5.99192	5.1695
1984-10-31	5.89	5.99192	5.1695
1984-11-07	6.62	5.99192	5.1695
1984-11-14	6.86	5.99192	5.1695
1984-11-21	7.37	5.99192	5.1695
1984-11-28	5.91	5.99192	5.1695
1984-12-05	6.02	5.99192	5.1695
1984-12-12	6.92	5.99192	5.1695
1984-12-19	8.28	5.99192	5.1695
1985-01-02	6.97	6.17635	5.86584
1985-01-09	7.77	6.17635	5.86584
1985-01-16	8.19	6.17635	5.86584
1985-01-23	9.47	6.17635	5.86584
1985-01-30	6.78	6.17635	5.86584
1985-02-06	6.47	6.17635	5.86584
1985-02-13	6.08	6.17635	5.86584
1985-02-20	7.17	6.17635	5.86584
1985-02-27	7.14	6.17635	5.86584
1985-03-06	7.46	6.17635	5.86584
1985-03-13	7.62	6.17635	5.86584
1985-03-20	7.64	6.17635	5.86584
1985-03-27	7.8	6.17635	5.86584
1985-04-03	7.03	6.17635	5.86584
1985-04-10	6.74	6.17635	5.86584
1985-04-17	6.2	6.17635	5.86584
1985-04-24	5.95	6.17635	5.86584
1985-05-02	6.32	6.17635	5.86584
1985-05-08	5.83	6.17635	5.86584
1985-05-14	5.15	6.17635	5.86584
1985-05-22	5.38	6.17635	5.86584
1985-05-29	5	6.17635	5.86584
1985-06-05	5.04	6.17635	5.86584
1985-06-12	4.76	6.17635	5.86584
1985-06-19	4.63	6.17635	5.86584
1985-06-26	4.72	6.17635	5.86584
1985-07-03	4.6	6.17635	5.86584
1985-07-10	4.69	6.17635	5.86584
1985-07-17	4.69	6.17635	5.86584
1985-07-24	4.7	6.17635	5.86584
1985-07-31	5.03	6.17635	5.86584
1985-08-07	5.28	6.17635	5.86584
1985-08-14	5	6.17635	5.86584
1985-08-21	5.33	6.17635	5.86584
1985-08-28	5.12	6.17635	5.86584
1985-09-04	5.03	6.17635	5.86584
1985-09-11	4.71	6.17635	5.86584
1985-09-18	5.44	6.17635	5.86584
1985-09-25	5.98	6.17635	5.86584
1985-10-02	6.68	6.17635	5.86584
1985-10-09	7.59	6.17635	5.86584
1985-10-16	7.75	6.17635	5.86584
1985-10-23	8.24	6.17635	5.86584
1985-10-30	8.55	6.17635	5.86584
1985-11-06	9.02	6.17635	5.86584
1985-11-13	8.22	6.17635	5.86584
1985-11-21	7.81	6.17635	5.86584
1985-11-27	8.33	6.17635	5.86584
1985-12-04	7.87	6.17635	5.86584
1985-12-11	7.86	6.17635	5.86584
1986-01-02	7.92	5.91269	4.81751
1986-01-08	#N/A	5.91269	4.81751
1986-01-15	8.11	5.91269	4.81751
1986-01-22	7.03	5.91269	4.81751
1986-01-29	5.91	5.91269	4.81751
1986-02-05	6.32	5.91269	4.81751
1986-02-12	7.27	5.91269	4.81751
1986-02-19	8.23	5.91269	4.81751
1986-02-26	8.69	5.91269	4.81751
1986-03-05	8.82	5.91269	4.81751
1986-03-12	8.1	5.91269	4.81751
1986-03-19	7.82	5.91269	4.81751
1986-03-26	7.43	5.91269	4.81751
1986-04-02	6.42	5.91269	4.81751
1986-04-09	5.85	5.91269	4.81751
1986-04-16	5.48	5.91269	4.81751
1986-04-23	6.06	5.91269	4.81751
1986-05-01	5.47	5.91269	4.81751
1986-05-06	5.17	5.91269	4.81751
1986-05-14	5.04	5.91269	4.81751
1986-05-21	4.99	5.91269	4.81751
1986-05-28	4.62	5.91269	4.81751
1986-06-04	4.36	5.91269	4.81751
1986-06-11	4.54	5.91269	4.81751
1986-06-18	4.26	5.91269	4.81751
1986-06-25	4.81	5.91269	4.81751
1986-07-02	4.46	5.91269	4.81751
1986-07-09	4.75	5.91269	4.81751
1986-07-16	4.59	5.91269	4.81751
1986-07-23	4.66	5.91269	4.81751
1986-07-30	4.57	5.91269	4.81751
1986-08-06	4.97	5.91269	4.81751
1986-08-13	5.03	5.91269	4.81751
1986-08-20	5.28	5.91269	4.81751
1986-08-27	5.07	5.91269	4.81751
1986-09-03	4.98	5.91269	4.81751
1986-09-10	5.32	5.91269	4.81751
1986-09-17	6.09	5.91269	4.81751
1986-09-24	5.67	5.91269	4.81751
1986-10-01	5.87	5.91269	4.81751
1986-10-08	6.64	5.91269	4.81751
1986-10-15	7.16	5.91269	4.81751
1986-10-22	7.27	5.91269	4.81751
1986-10-29	5.89	5.91269	4.81751
1986-11-05	5.23	5.91269	4.81751
1986-11-12	6.14	5.91269	4.81751
1986-11-19	6.93	5.91269	4.81751
1986-11-26	6.71	5.91269	4.81751
1986-12-03	6.76	5.91269	4.81751
1986-12-10	7.4	5.91269	4.81751
1986-12-17	7.57	5.91269	4.81751
1987-01-07	5.26	5.4667	4.48661
1987-01-14	5.04	5.4667	4.48661
1987-01-21	6.89	5.4667	4.48661
1987-01-28	7.12	5.4667	4.48661
1987-02-04	7.95	5.4667	4.48661
1987-02-11	7.91	5.4667	4.48661
1987-02-18	6.55	5.4667	4.48661
1987-02-25	7.32	5.4667	4.48661
1987-03-04	7.08	5.4667	4.48661
1987-03-11	5.67	5.4667	4.48661
1987-03-18	6.95	5.4667	4.48661
1987-03-25	6.99	5.4667	4.48661
1987-04-01	6.07	5.4667	4.48661
1987-04-08	6.12	5.4667	4.48661
1987-04-15	5.68	5.4667	4.48661
1987-04-22	5.88	5.4667	4.48661
1987-04-28	5.4	5.4667	4.48661
1987-05-06	5.32	5.4667	4.48661
1987-05-13	5.56	5.4667	4.48661
1987-05-20	4.92	5.4667	4.48661
1987-05-26	5.01	5.4667	4.48661
1987-06-03	4.96	5.4667	4.48661
1987-06-10	4.68	5.4667	4.48661
1987-06-17	4.49	5.4667	4.48661
1987-06-24	3.78	5.4667	4.48661
1987-07-01	3.96	5.4667	4.48661
1987-07-08	3.84	5.4667	4.48661
1987-07-15	3.73	5.4667	4.48661
1987-07-22	3.82	5.4667	4.48661
1987-07-29	3.89	5.4667	4.48661
1987-08-05	3.9	5.4667	4.48661
1987-08-12	3.81	5.4667	4.48661
1987-08-19	4.43	5.4667	4.48661
1987-08-26	4.59	5.4667	4.48661
1987-09-02	4.41	5.4667	4.48661
1987-09-09	4.85	5.4667	4.48661
1987-09-16	4.93	5.4667	4.48661
1987-09-23	5.63	5.4667	4.48661
1987-09-30	5.63	5.4667	4.48661
1987-10-07	5.42	5.4667	4.48661
1987-10-14	6	5.4667	4.48661
1987-10-21	5.82	5.4667	4.48661
1987-10-28	6.14	5.4667	4.48661
1987-11-04	6.44	5.4667	4.48661
1987-11-11	6.81	5.4667	4.48661
1987-11-18	6.71	5.4667	4.48661
1987-11-25	5.95	5.4667	4.48661
1987-12-02	6.18	5.4667	4.48661
1987-12-09	6.69	5.4667	4.48661
1987-12-16	6.63	5.4667	4.48661
1987-12-23	6.97	5.4667	4.48661
1987-12-30	5.94	5.4667	4.48661
1988-01-27	#N/A	5.13034	4.42329
1988-02-10	5.38	5.13034	4.42329
1988-02-24	6.02	5.13034	4.42329
1988-03-09	6.81	5.13034	4.42329
1988-04-06	4.94	5.13034	4.42329
1988-04-20	5.07	5.13034	4.42329
1988-05-03	4.91	5.13034	4.42329
1988-05-18	4.9	5.13034	4.42329
1988-06-01	4.65	5.13034	4.42329
1988-06-29	5.51	5.13034	4.42329
1988-07-13	3.99	5.13034	4.42329
1988-07-27	4.43	5.13034	4.42329
1988-08-10	3.97	5.13034	4.42329
1988-08-24	4.98	5.13034	4.42329
1988-09-07	4.47	5.13034	4.42329
1988-09-21	4.45	5.13034	4.42329
1988-10-05	5.67	5.13034	4.42329
1988-10-19	4.22	5.13034	4.42329
1988-11-02	5.25	5.13034	4.42329
1988-11-16	6.58	5.13034	4.42329
1988-11-30	6.57	5.13034	4.42329
1988-12-14	5.09	5.13034	4.42329
1988-12-28	5.19	5.13034	4.42329
1989-01-11	5.96	6.07363	5.4829
1989-01-26	6.06	6.07363	5.4829
1989-02-08	7.8	6.07363	5.4829
1989-02-22	7.99	6.07363	5.4829
1989-03-08	6.13	6.07363	5.4829
1989-03-22	6.06	6.07363	5.4829
1989-04-04	6.19	6.07363	5.4829
1989-04-19	6.42	6.07363	5.4829
1989-05-02	5.43	6.07363	5.4829
1989-05-17	5.43	6.07363	5.4829
1989-05-31	5.48	6.07363	5.4829
1989-06-14	5.73	6.07363	5.4829
1989-06-28	6.35	6.07363	5.4829
1989-07-12	5.15	6.07363	5.4829
1989-07-26	4.85	6.07363	5.4829
1989-08-09	4.68	6.07363	5.4829
1989-08-23	4.35	6.07363	5.4829
1989-09-06	5.03	6.07363	5.4829
1989-09-20	5.54	6.07363	5.4829
1989-10-04	6.04	6.07363	5.4829
1989-10-18	6.33	6.07363	5.4829
1989-11-01	6.18	6.07363	5.4829
1989-11-15	6.05	6.07363	5.4829
1989-11-29	6.95	6.07363	5.4829
1989-12-13	8.16	6.07363	5.4829
1989-12-27	7.14	6.07363	5.4829
1990-01-10	7.68	5.43308	5.09634
1990-01-24	8.1	5.43308	5.09634
1990-02-07	7.27	5.43308	5.09634
1990-02-21	5.25	5.43308	5.09634
1990-03-07	5.27	5.43308	5.09634
1990-03-21	6.2	5.43308	5.09634
1990-04-04	5.76	5.43308	5.09634
1990-04-18	6.32	5.43308	5.09634
1990-05-02	5.86	5.43308	5.09634
1990-05-16	5.44	5.43308	5.09634
1990-05-30	4.98	5.43308	5.09634
1990-06-13	4.63	5.43308	5.09634
1990-06-27	3.93	5.43308	5.09634
1990-07-11	3.81	5.43308	5.09634
1990-07-25	3.93	5.43308	5.09634
1990-08-08	4.15	5.43308	5.09634
1990-08-22	5.31	5.43308	5.09634
1990-09-05	4.83	5.43308	5.09634
1990-09-19	5.94	5.43308	5.09634
1990-10-03	5.21	5.43308	5.09634
1990-10-17	5.75	5.43308	5.09634
1990-10-31	6.36	5.43308	5.09634
1990-11-14	5.2	5.43308	5.09634
1990-11-28	5.27	5.43308	5.09634
1990-12-12	6.69	5.43308	5.09634
1991-01-09	5.4	5.31286	5.40402
1991-01-23	5.46	5.31286	5.40402
1991-02-20	6.21	5.31286	5.40402
1991-03-06	6.55	5.31286	5.40402
1991-03-20	6.54	5.31286	5.40402
1991-04-03	5.99	5.31286	5.40402
1991-04-17	#N/A	5.31286	5.40402
1991-05-01	#N/A	5.31286	5.40402
1991-05-15	6.2	5.31286	5.40402
1991-05-29	5.11	5.31286	5.40402
1991-06-12	4.3	5.31286	5.40402
1991-06-26	4.54	5.31286	5.40402
1991-07-10	3.72	5.31286	5.40402
1991-07-24	4.08	5.31286	5.40402
1991-08-07	3.51	5.31286	5.40402
1991-08-21	4.01	5.31286	5.40402
1991-09-04	4.49	5.31286	5.40402
1991-09-18	6.09	5.31286	5.40402
1991-10-02	5.73	5.31286	5.40402
1991-10-16	4.68	5.31286	5.40402
1991-10-30	5.33	5.31286	5.40402
1991-11-13	6.12	5.31286	5.40402
1991-11-27	5.48	5.31286	5.40402
1991-12-11	6.48	5.31286	5.40402
1991-12-17	7.07	5.31286	5.40402
1992-01-08	6.02	5.26097	4.53381
1992-01-22	6.03	5.26097	4.53381
1992-02-05	7.28	5.26097	4.53381
1992-02-19	6.86	5.26097	4.53381
1992-03-04	6.01	5.26097	4.53381
1992-03-18	6.86	5.26097	4.53381
1992-04-01	6.13	5.26097	4.53381
1992-04-15	5.44	5.26097	4.53381
1992-04-28	5.28	5.26097	4.53381
1992-05-13	4.69	5.26097	4.53381
1992-05-27	3.96	5.26097	4.53381
1992-06-10	4.39	5.26097	4.53381
1992-06-24	4.38	5.26097	4.53381
1992-07-08	4.34	5.26097	4.53381
1992-07-22	4.14	5.26097	4.53381
1992-08-05	4.03	5.26097	4.53381
1992-08-19	3.84	5.26097	4.53381
1992-09-02	4.58	5.26097	4.53381
1992-09-16	4.69	5.26097	4.53381
1992-09-30	4.92	5.26097	4.53381
1992-10-14	5.59	5.26097	4.53381
1992-10-28	5.66	5.26097	4.53381
1992-11-11	4.94	5.26097	4.53381
1992-12-02	4.36	5.26097	4.53381
1992-12-09	4.86	5.26097	4.53381
1992-12-15	6.03	5.26097	4.53381
1993-01-06	6.04	5.06308	4.34283
1993-01-20	7.05	5.06308	4.34283
1993-02-03	4.55	5.06308	4.34283
1993-02-17	5.96	5.06308	4.34283
1993-03-03	6.7	5.06308	4.34283
1993-03-17	6.69	5.06308	4.34283
1993-03-31	5.63	5.06308	4.34283
1993-04-14	5.07	5.06308	4.34283
1993-04-28	6.31	5.06308	4.34283
1993-05-12	4.69	5.06308	4.34283
1993-05-26	4.82	5.06308	4.34283
1993-06-09	4.61	5.06308	4.34283
1993-06-23	3.97	5.06308	4.34283
1993-07-07	3.86	5.06308	4.34283
1993-07-21	2.92	5.06308	4.34283
1993-08-04	3.65	5.06308	4.34283
1993-08-18	2.88	5.06308	4.34283
1993-09-01	4.11	5.06308	4.34283
1993-09-15	3.95	5.06308	4.34283
1993-09-29	4.42	5.06308	4.34283
1993-10-13	3.97	5.06308	4.34283
1993-10-27	3.88	5.06308	4.34283
1993-11-10	4.73	5.06308	4.34283
1993-11-24	5.2	5.06308	4.34283
1993-12-08	5.75	5.06308	4.34283
1993-12-22	6.88	5.06308	4.34283
1994-01-05	5.77	4.9871	3.53634
1994-02-02	5.04	4.9871	3.53634
1994-02-16	5.58	4.9871	3.53634
1994-03-02	5.29	4.9871	3.53634
1994-03-16	5.64	4.9871	3.53634
1994-03-30	5.39	4.9871	3.53634
1994-04-13	4.86	4.9871	3.53634
1994-04-27	8.74	4.9871	3.53634
1994-05-11	4.73	4.9871	3.53634
1994-05-25	#N/A	4.9871	3.53634
1994-06-08	#N/A	4.9871	3.53634
1994-06-22	3.73	4.9871	3.53634
1994-07-06	3.61	4.9871	3.53634
1994-07-20	3.68	4.9871	3.53634
1994-08-03	3.37	4.9871	3.53634
1994-08-17	3.38	4.9871	3.53634
1994-08-31	4.05	4.9871	3.53634
1994-09-14	3.45	4.9871	3.53634
1994-09-28	3.93	4.9871	3.53634
1994-10-12	3.85	4.9871	3.53634
1994-10-26	4.44	4.9871	3.53634
1994-11-09	4.82	4.9871	3.53634
1994-11-23	5.29	4.9871	3.53634
1994-12-07	5.09	4.9871	3.53634
1994-12-21	4.79	4.9871	3.53634
1995-01-04	5.49	4.33057	3.29138
1995-01-18	5.8	4.33057	3.29138
1995-02-01	4.54	4.33057	3.29138
1995-02-15	4.29	4.33057	3.29138
1995-03-01	5.75	4.33057	3.29138
1995-03-15	5.13	4.33057	3.29138
1995-03-29	4.26	4.33057	3.29138
1995-04-12	2.79	4.33057	3.29138
1995-04-26	4.07	4.33057	3.29138
1995-05-10	3.53	4.33057	3.29138
1995-05-24	3.7	4.33057	3.29138
1995-06-07	3.79	4.33057	3.29138
1995-06-21	3.96	4.33057	3.29138
1995-07-05	3.59	4.33057	3.29138
1995-07-19	3.33	4.33057	3.29138
1995-08-02	3.37	4.33057	3.29138
1995-08-16	3.82	4.33057	3.29138
1995-08-30	3.82	4.33057	3.29138
1995-09-13	3.58	4.33057	3.29138
1995-09-27	3.68	4.33057	3.29138
1995-10-11	3.51	4.33057	3.29138
1995-10-25	4.47	4.33057	3.29138
1995-11-08	4.69	4.33057	3.29138
1995-11-22	4.55	4.33057	3.29138
1995-12-06	5.16	4.33057	3.29138
1995-12-20	5.88	4.33057	3.29138
1996-01-03	4.76	4.45015	4.50725
1996-01-17	5.08	4.45015	4.50725
1996-01-31	6.12	4.45015	4.50725
1996-02-14	6.48	4.45015	4.50725
1996-02-28	6.13	4.45015	4.50725
1996-03-13	6.3	4.45015	4.50725
1996-03-27	5.97	4.45015	4.50725
1996-04-10	5.32	4.45015	4.50725
1996-04-24	5.41	4.45015	4.50725
1996-05-08	4.57	4.45015	4.50725
1996-05-22	4.57	4.45015	4.50725
1996-06-05	3.41	4.45015	4.50725
1996-06-19	3.29	4.45015	4.50725
1996-07-03	3.8	4.45015	4.50725
1996-07-17	3.42	4.45015	4.50725
1996-07-31	2.93	4.45015	4.50725
1996-08-14	2.86	4.45015	4.50725
1996-08-28	2.89	4.45015	4.50725
1996-09-11	4.15	4.45015	4.50725
1996-09-25	3.57	4.45015	4.50725
1996-10-09	2.77	4.45015	4.50725
1996-10-23	4.17	4.45015	4.50725
1996-11-06	4.29	4.45015	4.50725
1996-11-20	4.91	4.45015	4.50725
1996-12-04	5.43	4.45015	4.50725
1996-12-18	3.88	4.45015	4.50725
1996-12-30	4.03	4.45015	4.50725
1997-01-29	5.17	4.11847	4.11833
1997-02-12	5.01	4.11847	4.11833
1997-02-26	5.4	4.11847	4.11833
1997-03-12	4.55	4.11847	4.11833
1997-03-26	5.23	4.11847	4.11833
1997-04-09	5.15	4.11847	4.11833
1997-04-23	#N/A	4.11847	4.11833
1997-05-06	4.16	4.11847	4.11833
1997-05-21	3.44	4.11847	4.11833
1997-06-04	5.39	4.11847	4.11833
1997-06-18	2.95	4.11847	4.11833
1997-07-02	3.49	4.11847	4.11833
1997-07-16	2.96	4.11847	4.11833
1997-07-30	2.49	4.11847	4.11833
1997-08-13	2.31	4.11847	4.11833
1997-08-27	4.27	4.11847	4.11833
1997-09-10	2.59	4.11847	4.11833
1997-09-24	3.58	4.11847	4.11833
1997-10-08	3.56	4.11847	4.11833
1997-10-22	3.76	4.11847	4.11833
1997-11-05	4.19	4.11847	4.11833
1997-11-19	4.42	4.11847	4.11833
1997-12-03	4.71	4.11847	4.11833
1997-12-17	5.24	4.11847	4.11833
1998-01-14	5.4	4.49183	3.66241
1998-01-28	4.88	4.49183	3.66241
1998-02-11	4.96	4.49183	3.66241
1998-02-25	5.08	4.49183	3.66241
1998-03-11	5.93	4.49183	3.66241
1998-03-25	6.82	4.49183	3.66241
1998-04-08	4.69	4.49183	3.66241
1998-04-22	3.85	4.49183	3.66241
1998-05-06	4.85	4.49183	3.66241
1998-05-18	3.68	4.49183	3.66241
1998-06-03	3.55	4.49183	3.66241
1998-06-17	3.08	4.49183	3.66241
1998-07-01	3.19	4.49183	3.66241
1998-07-15	3.74	4.49183	3.66241
1998-07-29	2.92	4.49183	3.66241
1998-08-12	3.61	4.49183	3.66241
1998-08-26	4.02	4.49183	3.66241
1998-09-09	3.61	4.49183	3.66241
1998-09-23	3.91	4.49183	3.66241
1998-10-07	3.75	4.49183	3.66241
1998-10-21	4.31	4.49183	3.66241
1998-11-04	4.76	4.49183	3.66241
1998-11-18	4.12	4.49183	3.66241
1998-12-02	4.26	4.49183	3.66241
1998-12-16	5.43	4.49183	3.66241
1998-12-28	4.24	4.49183	3.66241
1999-01-13	4.6	3.40167	3.25095
1999-01-27	5.06	3.40167	3.25095
1999-02-10	5.07	3.40167	3.25095
1999-02-24	5.1	3.40167	3.25095
1999-03-10	3.95	3.40167	3.25095
1999-03-24	3.84	3.40167	3.25095
1999-04-07	4.58	3.40167	3.25095
1999-04-21	4.08	3.40167	3.25095
1999-05-03	3.4	3.40167	3.25095
1999-05-19	2.28	3.40167	3.25095
1999-06-02	2.81	3.40167	3.25095
1999-06-16	2.85	3.40167	3.25095
1999-06-30	2.47	3.40167	3.25095
1999-07-14	2.98	3.40167	3.25095
1999-07-28	3.08	3.40167	3.25095
1999-08-11	3.04	3.40167	3.25095
1999-08-25	3	3.40167	3.25095
1999-09-08	3.05	3.40167	3.25095
1999-09-22	3.06	3.40167	3.25095
1999-10-06	3.85	3.40167	3.25095
1999-10-20	2.83	3.40167	3.25095
1999-11-03	2.06	3.40167	3.25095
1999-11-17	3.2	3.40167	3.25095
1999-12-01	1.19	3.40167	3.25095
1999-12-15	1.52	3.40167	3.25095
1999-12-29	2.55	3.40167	3.25095
2000-01-12	3.18	3.44398	3.0619
2000-01-26	5.34	3.44398	3.0619
2000-02-09	3.31	3.44398	3.0619
2000-02-23	3.73	3.44398	3.0619
2000-03-08	#N/A	3.44398	3.0619
2000-03-22	3.84	3.44398	3.0619
2000-04-05	4.31	3.44398	3.0619
2000-04-19	3.49	3.44398	3.0619
2000-05-03	3.22	3.44398	3.0619
2000-05-17	2.78	3.44398	3.0619
2000-05-31	2.86	3.44398	3.0619
2000-06-14	3.31	3.44398	3.0619
2000-06-28	2.63	3.44398	3.0619
2000-07-12	3.45	3.44398	3.0619
2000-07-26	2.42	3.44398	3.0619
2000-08-09	2.95	3.44398	3.0619
2000-08-23	2.42	3.44398	3.0619
2000-09-06	2.79	3.44398	3.0619
2000-09-20	3.62	3.44398	3.0619
2000-10-04	3.35	3.44398	3.0619
2000-10-18	3.78	3.44398	3.0619
2000-11-01	3.31	3.44398	3.0619
2000-11-15	3.67	3.44398	3.0619
2000-11-29	3.78	3.44398	3.0619
2000-12-13	3.6	3.44398	3.0619
2000-12-27	3.6	3.44398	3.0619
2001-01-10	3.7	3.33798	#N/A
2001-01-24	4	3.33798	#N/A
2001-02-07	4.66	3.33798	#N/A
2001-02-21	4.16	3.33798	#N/A
2001-03-07	4.55	3.33798	#N/A
2001-03-21	3.74	3.33798	#N/A
2001-04-04	3.51	3.33798	#N/A
2001-04-18	3.37	3.33798	#N/A
2001-05-02	3.2	3.33798	#N/A
2001-05-16	2.68	3.33798	#N/A
2001-05-30	2.88	3.33798	#N/A
2001-06-13	2.24	3.33798	#N/A
2001-06-27	2.19	3.33798	#N/A
2001-07-11	2.58	3.33798	#N/A
2001-07-25	2.225	3.33798	#N/A
2001-08-08	3.09	3.33798	#N/A
2001-08-22	1.34	3.33798	#N/A
2001-09-05	2.81	3.33798	#N/A
2001-09-19	2.1	3.33798	#N/A
2001-10-03	2.59	3.33798	#N/A
2001-10-17	2.51	3.33798	#N/A
2001-10-31	3.27	3.33798	#N/A
2001-11-14	3.83	3.33798	#N/A
2001-11-28	4.12	3.33798	#N/A
2001-12-12	3.73	3.33798	#N/A
2001-12-27	4.78	3.33798	#N/A
2002-01-09	4.34	3.59085	#N/A
2002-01-23	5.02	3.59085	#N/A
2002-02-06	3.69	3.59085	#N/A
2002-02-20	4.53	3.59085	#N/A
2002-03-06	3.69	3.59085	#N/A
2002-03-20	3.96	3.59085	#N/A
2002-04-03	4.15	3.59085	#N/A
2002-04-17	3.74	3.59085	#N/A
2002-05-01	3.89	3.59085	#N/A
2002-05-15	3.96	3.59085	#N/A
2002-05-29	3.29	3.59085	#N/A
2002-06-12	4.44	3.59085	#N/A
2002-06-26	2.49	3.59085	#N/A
2002-07-10	2.96	3.59085	#N/A
2002-07-24	3.21	3.59085	#N/A
2002-08-07	3.28	3.59085	#N/A
2002-08-21	3.02	3.59085	#N/A
2002-09-04	3.18	3.59085	#N/A
2002-09-18	2.97	3.59085	#N/A
2002-10-02	2.33	3.59085	#N/A
2002-10-16	3.17	3.59085	#N/A
2002-10-30	2.62	3.59085	#N/A
2002-11-13	3.6	3.59085	#N/A
2002-11-27	2.9	3.59085	#N/A
2002-12-11	2.98	3.59085	#N/A
2002-12-23	4.72	3.59085	#N/A
2003-01-08	3.78	3.56425	#N/A
2003-01-22	3.71	3.56425	#N/A
2003-02-05	4.6	3.56425	#N/A
2003-02-19	3.92	3.56425	#N/A
2003-03-05	5.02	3.56425	#N/A
2003-03-19	3.67	3.56425	#N/A
2003-04-02	3.69	3.56425	#N/A
2003-04-16	3.19	3.56425	#N/A
2003-04-28	5.36	3.56425	#N/A
2003-05-14	3.09	3.56425	#N/A
2003-05-26	3.48	3.56425	#N/A
2003-06-11	2.48	3.56425	#N/A
2003-06-25	2.24	3.56425	#N/A
2003-07-09	2.56	3.56425	#N/A
2003-07-23	2.99	3.56425	#N/A
2003-08-06	2.05	3.56425	#N/A
2003-08-20	2.79	3.56425	#N/A
2003-09-03	3.03	3.56425	#N/A
2003-09-17	2.74	3.56425	#N/A
2003-10-01	3.06	3.56425	#N/A
2003-10-15	3.07	3.56425	#N/A
2003-10-29	3.19	3.56425	#N/A
2003-11-12	2.51	3.56425	#N/A
2003-11-26	3.32	3.56425	#N/A
2003-12-10	3.46	3.56425	#N/A
2003-12-22	4.56	3.56425	#N/A
2004-01-07	#N/A	#N/A	#N/A
2004-01-21	#N/A	#N/A	#N/A
2004-02-04	#N/A	#N/A	#N/A
2004-02-18	#N/A	#N/A	#N/A
2004-03-03	#N/A	#N/A	#N/A
2004-03-17	#N/A	#N/A	#N/A
2004-03-31	#N/A	#N/A	#N/A
2004-04-14	#N/A	#N/A	#N/A
2004-04-28	#N/A	#N/A	#N/A
2004-05-12	#N/A	#N/A	#N/A
2004-05-26	#N/A	#N/A	#N/A
2004-06-09	#N/A	#N/A	#N/A
2004-06-23	#N/A	#N/A	#N/A
2004-07-07	#N/A	#N/A	#N/A
2004-07-21	#N/A	#N/A	#N/A
2004-08-04	#N/A	#N/A	#N/A
2004-08-18	#N/A	#N/A	#N/A
2004-09-01	#N/A	#N/A	#N/A
2004-09-15	#N/A	#N/A	#N/A
2004-09-29	#N/A	#N/A	#N/A
2004-10-13	#N/A	#N/A	#N/A
2004-10-27	#N/A	#N/A	#N/A
2004-11-10	#N/A	#N/A	#N/A
2004-11-24	#N/A	#N/A	#N/A
2004-12-08	#N/A	#N/A	#N/A
2004-12-22	#N/A	#N/A	#N/A
2005-01-05	4.9	3.52928	#N/A
2005-01-19	5.8	3.52928	#N/A
2005-02-02	4.5	3.52928	#N/A
2005-02-16	4.8	3.52928	#N/A
2005-03-02	3.7	3.52928	#N/A
2005-03-16	4.8	3.52928	#N/A
2005-03-30	3.9	3.52928	#N/A
2005-04-13	3.2	3.52928	#N/A
2005-04-27	3.53	3.52928	#N/A
2005-05-11	3.35	3.52928	#N/A
2005-05-25	2.63	3.52928	#N/A
2005-06-08	2.61	3.52928	#N/A
2005-06-22	2.37	3.52928	#N/A
2005-07-06	2.73	3.52928	#N/A
2005-07-20	2.19	3.52928	#N/A
2005-08-03	2.44	3.52928	#N/A
2005-08-17	2.33	3.52928	#N/A
2005-08-31	2.34	3.52928	#N/A
2005-09-14	1.99	3.52928	#N/A
2005-09-28	2.52	3.52928	#N/A
2005-10-12	3.49	3.52928	#N/A
2005-10-26	3.17	3.52928	#N/A
2005-11-09	3.15	3.52928	#N/A
2005-11-22	3.52	3.52928	#N/A
2005-12-07	3.72	3.52928	#N/A
2005-12-21	4.44	3.52928	#N/A
2006-01-04	4.4	3.46821	#N/A
2006-01-18	#N/A	3.46821	#N/A
2006-02-01	4.34	3.46821	#N/A
2006-02-15	4.72	3.46821	#N/A
2006-03-01	5.17	3.46821	#N/A
2006-03-15	5.19	3.46821	#N/A
2006-03-29	3.89	3.46821	#N/A
2006-04-12	3.2	3.46821	#N/A
2006-04-26	3.52	3.46821	#N/A
2006-05-10	2.9	3.46821	#N/A
2006-05-23	2.45	3.46821	#N/A
2006-06-07	2.74	3.46821	#N/A
2006-06-21	2.53	3.46821	#N/A
2006-07-05	2.26	3.46821	#N/A
2006-07-19	2.27	3.46821	#N/A
2006-08-02	2.64	3.46821	#N/A
2006-08-16	2.58	3.46821	#N/A
2006-08-30	2.56	3.46821	#N/A
2006-09-13	2.69	3.46821	#N/A
2006-09-27	2.57	3.46821	#N/A
2006-10-11	3.03	3.46821	#N/A
2006-10-25	3.2	3.46821	#N/A
2006-11-08	3.12	3.46821	#N/A
2006-11-22	3.58	3.46821	#N/A
2006-12-06	3.81	3.46821	#N/A
2006-12-20	5.33	3.46821	#N/A
2007-01-03	3.83	3.1374	#N/A
2007-01-17	3.23	3.1374	#N/A
2007-01-31	3.78	3.1374	#N/A
2007-02-14	4.5	3.1374	#N/A
2007-02-28	3.7	3.1374	#N/A
2007-03-14	3.42	3.1374	#N/A
2007-03-28	3.78	3.1374	#N/A
2007-04-11	2.8	3.1374	#N/A
2007-04-25	3.15	3.1374	#N/A
2007-05-09	3.04	3.1374	#N/A
2007-05-23	2.35	3.1374	#N/A
2007-06-06	3	3.1374	#N/A
2007-06-20	2.09	3.1374	#N/A
2007-07-04	2.33	3.1374	#N/A
2007-07-18	2.06	3.1374	#N/A
2007-08-01	2.24	3.1374	#N/A
2007-08-15	2.15	3.1374	#N/A
2007-08-29	2.49	3.1374	#N/A
2007-09-12	4.1	3.1374	#N/A
2007-09-26	2.31	3.1374	#N/A
2007-10-10	3.13	3.1374	#N/A
2007-10-24	3.04	3.1374	#N/A
2007-11-07	3.84	3.1374	#N/A
2007-11-21	3.86	3.1374	#N/A
2007-12-05	4.22	3.1374	#N/A
2007-12-19	3.02	3.1374	#N/A
2008-01-02	4.1	3.04463	#N/A
2008-01-16	3.41	3.04463	#N/A
2008-01-30	3.72	3.04463	#N/A
2008-02-13	3.87	3.04463	#N/A
2008-02-27	3.53	3.04463	#N/A
2008-03-12	3.89	3.04463	#N/A
2008-03-26	3.73	3.04463	#N/A
2008-04-09	3.38	3.04463	#N/A
2008-04-23	3.39	3.04463	#N/A
2008-05-07	2.56	3.04463	#N/A
2008-05-21	2.6	3.04463	#N/A
2008-06-04	2.78	3.04463	#N/A
2008-06-18	2.81	3.04463	#N/A
2008-07-02	1.84	3.04463	#N/A
2008-07-16	1.87	3.04463	#N/A
2008-07-30	1.78	3.04463	#N/A
2008-08-13	2.3	3.04463	#N/A
2008-08-27	2.08	3.04463	#N/A
2008-09-10	2.1	3.04463	#N/A
2008-09-24	3.71	3.04463	#N/A
2008-10-08	3.07	3.04463	#N/A
2008-10-22	2.51	3.04463	#N/A
2008-11-05	2.55	3.04463	#N/A
2008-11-19	2.79	3.04463	#N/A
2008-12-03	2.87	3.04463	#N/A
2008-12-17	3.38	3.04463	#N/A
2008-12-30	3.35	3.04463	#N/A
2009-01-14	3.65	3.11512	#N/A
2009-01-28	4.56	3.11512	#N/A
2009-02-11	4.22	3.11512	#N/A
2009-02-25	4.33	3.11512	#N/A
2009-03-11	4.04	3.11512	#N/A
2009-03-25	3.13	3.11512	#N/A
2009-04-08	2.96	3.11512	#N/A
2009-04-22	2.64	3.11512	#N/A
2009-05-06	2.56	3.11512	#N/A
2009-05-20	2.97	3.11512	#N/A
2009-06-03	2.19	3.11512	#N/A
2009-06-17	2.15	3.11512	#N/A
2009-07-01	2.03	3.11512	#N/A
2009-07-15	1.86	3.11512	#N/A
2009-07-29	1.79	3.11512	#N/A
2009-08-12	1.64	3.11512	#N/A
2009-08-26	1.87	3.11512	#N/A
2009-09-09	2.48	3.11512	#N/A
2009-09-23	2.35	3.11512	#N/A
2009-10-07	2.55	3.11512	#N/A
2009-10-21	2.82	3.11512	#N/A
2009-11-04	2.66	3.11512	#N/A
2009-11-18	2.92	3.11512	#N/A
2009-12-02	3.69	3.11512	#N/A
2009-12-16	4.1	3.11512	#N/A
2009-12-30	4.25	3.11512	#N/A
2010-01-13	3.43	3.07243	#N/A
2010-01-27	3.98	3.07243	#N/A
2010-02-10	4.47	3.07243	#N/A
2010-02-24	3.97	3.07243	#N/A
2010-03-10	3.73	3.07243	#N/A
2010-03-24	4.13	3.07243	#N/A
2010-04-07	3.18	3.07243	#N/A
2010-04-21	2.96	3.07243	#N/A
2010-05-06	2.73	3.07243	#N/A
2010-05-19	2.53	3.07243	#N/A
2010-06-02	2.3	3.07243	#N/A
2010-06-16	2.16	3.07243	#N/A
2010-06-30	1.79	3.07243	#N/A
2010-07-14	1.79	3.07243	#N/A
2010-07-28	2.39	3.07243	#N/A
2010-08-11	1.79	3.07243	#N/A
2010-08-25	1.94	3.07243	#N/A
2010-09-08	2.39	3.07243	#N/A
2010-09-22	1.97	3.07243	#N/A
2010-10-06	2.18	3.07243	#N/A
2010-10-20	2.52	3.07243	#N/A
2010-11-03	2.54	3.07243	#N/A
2010-11-17	4.01	3.07243	#N/A
2010-12-01	3.23	3.07243	#N/A
2010-12-15	3.84	3.07243	#N/A
2010-12-29	3.67	3.07243	#N/A
2011-01-12	4.69	3.28543	#N/A
2011-01-26	3.81	3.28543	#N/A
2011-02-09	3.98	3.28543	#N/A
2011-02-23	4.37	3.28543	#N/A
2011-03-09	4.45	3.28543	#N/A
2011-03-23	3.79	3.28543	#N/A
2011-04-06	3.85	3.28543	#N/A
2011-04-20	2.56	3.28543	#N/A
2011-05-03	2.44	3.28543	#N/A
2011-05-18	2.93	3.28543	#N/A
2011-05-31	2.4	3.28543	#N/A
2011-06-15	2.55	3.28543	#N/A
2011-06-29	2.15	3.28543	#N/A
2011-07-13	2.6	3.28543	#N/A
2011-07-27	2.15	3.28543	#N/A
2011-08-10	2.28	3.28543	#N/A
2011-08-24	2.57	3.28543	#N/A
2011-09-07	1.95	3.28543	#N/A
2011-09-21	3.07	3.28543	#N/A
2011-10-05	2.28	3.28543	#N/A
2011-10-19	2.06	3.28543	#N/A
2011-11-02	2.2	3.28543	#N/A
2011-11-16	2.98	3.28543	#N/A
2011-11-30	2.68	3.28543	#N/A
2011-12-14	3.62	3.28543	#N/A
2011-12-28	2.75	3.28543	#N/A
2012-01-11	4.8	3.11292	#N/A
2012-01-25	4.24	3.11292	#N/A
2012-02-08	3.63	3.11292	#N/A
2012-02-22	3.85	3.11292	#N/A
2012-03-07	3.99	3.11292	#N/A
2012-03-21	3.07	3.11292	#N/A
2012-04-04	2.91	3.11292	#N/A
2012-04-18	2.56	3.11292	#N/A
2012-05-02	3.02	3.11292	#N/A
2012-05-15	2.38	3.11292	#N/A
2012-05-30	2.48	3.11292	#N/A
2012-06-13	2.38	3.11292	#N/A
2012-06-27	1.87	3.11292	#N/A
2012-07-11	1.86	3.11292	#N/A
2012-07-25	2.11	3.11292	#N/A
2012-08-08	1.47	3.11292	#N/A
2012-08-22	1.6	3.11292	#N/A
2012-09-05	2.03	3.11292	#N/A
2012-09-19	3.01	3.11292	#N/A
2012-10-03	1.96	3.11292	#N/A
2012-10-17	2.28	3.11292	#N/A
2012-10-31	2.35	3.11292	#N/A
2012-11-14	2.99	3.11292	#N/A
2012-11-28	2.82	3.11292	#N/A
2012-12-12	3.58	3.11292	#N/A
2012-12-27	3.8	3.11292	#N/A

## Sheet: figure 5
pH	fdenpHrip
3	0
4	0.1
5	0.25
6	0.8
7	1
9	1

## Sheet: figure 6EF
Year	Simulation	Observation	Residue
1970	4.59549	5.63972	1.04422
1971	6.33358	7.1884	0.854821
1972	6.34634	7.10918	0.762835
1973	5.78217	6.67756	0.895389
1974	5.42061	6.73405	1.31344
1975	4.79194	5.88358	1.09164
1976	6.42098	7.25836	0.837388
1977	5.0461	6.18916	1.14306
1978	4.88693	5.85263	0.965706
1979	4.97226	6.01176	1.0395
1980	5.09381	5.65512	0.561316
1981	4.63226	5.41814	0.785884
1982	4.67352	5.06405	0.390535
1983	4.84484	5.363	0.51816
1984	5.1695	5.99192	0.822414
1985	5.86584	6.17635	0.310513
1986	4.81751	5.91269	1.09518
1987	4.48661	5.4667	0.980091
1988	4.42329	5.13034	0.707048
1989	5.4829	6.07363	0.590728
1990	5.09634	5.43308	0.336739
1991	5.40402	5.31286	-0.0911563
1992	4.53381	5.26097	0.727165
1993	4.34283	5.06308	0.720255
1994	3.53634	4.9871	1.45076
1995	3.29138	4.33057	1.0392
1996	4.50725	4.45015	-0.0571047
1997	4.11833	4.11847	0.000139075
1998	3.66241	4.49183	0.829418
1999	3.25095	3.40167	0.150713
2000	3.0619	3.44398	0.382082

## Sheet: figure 6G
datum	Observation	Year observation	Simulation
1970-01-08	7.5	4.57975	4.2124
1970-01-29	4.5	4.57975	4.2124
1970-04-09	4.6	4.57975	4.2124
1970-04-23	3.8	4.57975	4.2124
1970-05-01	4.6	4.57975	4.2124
1970-05-06	5.2	4.57975	4.2124
1970-05-22	3.6	4.57975	4.2124
1970-05-28	3.8	4.57975	4.2124
1970-06-04	4.3	4.57975	4.2124
1970-06-18	3.7	4.57975	4.2124
1970-07-01	5.2	4.57975	4.2124
1970-07-30	5.8	4.57975	4.2124
1970-08-27	4.1	4.57975	4.2124
1970-09-17	3.4	4.57975	4.2124
1970-10-08	4.7	4.57975	4.2124
1970-10-22	4.5	4.57975	4.2124
1970-11-16	5.8	4.57975	4.2124
1970-12-03	5.4	4.57975	4.2124
1971-01-21	7.9	4.97576	6.02369
1971-02-17	4.5	4.97576	6.02369
1971-03-25	#N/A	4.97576	6.02369
1971-04-05	4.1	4.97576	6.02369
1971-04-28	6.2	4.97576	6.02369
1971-06-22	5.5	4.97576	6.02369
1971-07-07	3.9	4.97576	6.02369
1971-07-16	3.5	4.97576	6.02369
1971-07-21	4.2	4.97576	6.02369
1971-08-04	3.7	4.97576	6.02369
1971-08-16	5.4	4.97576	6.02369
1971-09-01	4.1	4.97576	6.02369
1971-09-15	3.8	4.97576	6.02369
1971-09-27	3.6	4.97576	6.02369
1971-10-13	#N/A	4.97576	6.02369
1971-10-27	5.5	4.97576	6.02369
1971-11-10	6.5	4.97576	6.02369
1971-11-23	4.9	4.97576	6.02369
1971-12-08	4	4.97576	6.02369
1971-12-20	4.5	4.97576	6.02369
1972-01-05	5	4.3347	5.45054
1972-01-20	#N/A	4.3347	5.45054
1972-02-16	4.4	4.3347	5.45054
1972-03-01	5.8	4.3347	5.45054
1972-03-16	4.6	4.3347	5.45054
1972-03-27	4.7	4.3347	5.45054
1972-04-10	3.9	4.3347	5.45054
1972-04-26	4.7	4.3347	5.45054
1972-05-09	5.1	4.3347	5.45054
1972-05-24	3.9	4.3347	5.45054
1972-06-08	4.4	4.3347	5.45054
1972-06-21	3.3	4.3347	5.45054
1972-07-24	3.9	4.3347	5.45054
1972-07-26	3.6	4.3347	5.45054
1972-08-22	3.5	4.3347	5.45054
1972-09-07	3.8	4.3347	5.45054
1972-09-19	5.1	4.3347	5.45054
1972-10-03	5.8	4.3347	5.45054
1972-10-17	4.8	4.3347	5.45054
1972-11-01	4.2	4.3347	5.45054
1972-11-14	4.6	4.3347	5.45054
1972-11-30	4	4.3347	5.45054
1972-12-04	4.4	4.3347	5.45054
1972-12-19	4.2	4.3347	5.45054
1973-01-16	5.1	5.19796	6.34476
1973-02-01	5	5.19796	6.34476
1973-02-14	6.7	5.19796	6.34476
1973-02-28	6.8	5.19796	6.34476
1973-03-14	3.2	5.19796	6.34476
1973-03-29	3.8	5.19796	6.34476
1973-04-02	4.9	5.19796	6.34476
1973-04-11	3.7	5.19796	6.34476
1973-04-16	3.4	5.19796	6.34476
1973-04-26	4.2	5.19796	6.34476
1973-05-09	3.3	5.19796	6.34476
1973-05-22	3.1	5.19796	6.34476
1973-06-06	3.7	5.19796	6.34476
1973-06-12	3.5	5.19796	6.34476
1973-06-21	3.6	5.19796	6.34476
1973-07-04	3.5	5.19796	6.34476
1973-07-09	4.9	5.19796	6.34476
1973-07-19	4.7	5.19796	6.34476
1973-07-23	4.4	5.19796	6.34476
1973-08-01	3.6	5.19796	6.34476
1973-08-14	4.6	5.19796	6.34476
1973-08-22	4.6	5.19796	6.34476
1973-08-29	7.3	5.19796	6.34476
1973-09-04	5.2	5.19796	6.34476
1973-09-13	5	5.19796	6.34476
1973-09-18	5	5.19796	6.34476
1973-09-26	5.8	5.19796	6.34476
1973-10-02	3.7	5.19796	6.34476
1973-10-09	4.6	5.19796	6.34476
1973-10-16	6.1	5.19796	6.34476
1973-10-23	5.2	5.19796	6.34476
1973-10-29	4.6	5.19796	6.34476
1973-11-08	4.3	5.19796	6.34476
1973-11-12	5.1	5.19796	6.34476
1973-11-20	3.9	5.19796	6.34476
1973-11-26	4.2	5.19796	6.34476
1973-12-06	7.1	5.19796	6.34476
1973-12-10	5.3	5.19796	6.34476
1973-12-19	6	5.19796	6.34476
1973-12-27	5.3	5.19796	6.34476
1974-01-03	4.3	4.56304	4.86194
1974-01-07	4.8	4.56304	4.86194
1974-01-16	5.1	4.56304	4.86194
1974-01-21	4.5	4.56304	4.86194
1974-02-04	4.8	4.56304	4.86194
1974-02-12	5.8	4.56304	4.86194
1974-02-18	3.9	4.56304	4.86194
1974-02-28	4.6	4.56304	4.86194
1974-03-04	5.4	4.56304	4.86194
1974-03-13	5.2	4.56304	4.86194
1974-03-18	5.6	4.56304	4.86194
1974-03-26	3.7	4.56304	4.86194
1974-04-01	4.7	4.56304	4.86194
1974-04-09	4.7	4.56304	4.86194
1974-04-16	6.1	4.56304	4.86194
1974-04-25	6.1	4.56304	4.86194
1974-04-29	#N/A	4.56304	4.86194
1974-05-09	4.6	4.56304	4.86194
1974-05-15	5.3	4.56304	4.86194
1974-05-20	4.6	4.56304	4.86194
1974-05-28	4.3	4.56304	4.86194
1974-06-06	#N/A	4.56304	4.86194
1974-06-12	6.9	4.56304	4.86194
1974-06-17	5	4.56304	4.86194
1974-06-25	6.6	4.56304	4.86194
1974-07-02	5.5	4.56304	4.86194
1974-07-08	4.6	4.56304	4.86194
1974-07-18	5.2	4.56304	4.86194
1974-07-22	5	4.56304	4.86194
1974-07-30	5	4.56304	4.86194
1974-08-05	5.2	4.56304	4.86194
1974-08-13	4.4	4.56304	4.86194
1974-08-22	5.9	4.56304	4.86194
1974-08-27	5.1	4.56304	4.86194
1974-09-04	5.6	4.56304	4.86194
1974-09-10	4.3	4.56304	4.86194
1974-09-19	5.2	4.56304	4.86194
1974-09-24	4.6	4.56304	4.86194
1974-10-03	4.7	4.56304	4.86194
1974-10-09	6.6	4.56304	4.86194
1974-10-14	4.6	4.56304	4.86194
1974-10-22	5.1	4.56304	4.86194
1974-10-28	4.1	4.56304	4.86194
1974-11-07	4.1	4.56304	4.86194
1974-11-13	4.1	4.56304	4.86194
1974-11-19	4.2	4.56304	4.86194
1974-11-25	3.8	4.56304	4.86194
1974-12-04	3.7	4.56304	4.86194
1974-12-09	3.6	4.56304	4.86194
1974-12-17	4.5	4.56304	4.86194
1974-12-23	3.8	4.56304	4.86194
1975-01-06	3.4	4.20115	5.516
1975-01-13	4.1	4.20115	5.516
1975-01-22	4.2	4.20115	5.516
1975-01-27	3.5	4.20115	5.516
1975-02-05	3	4.20115	5.516
1975-02-07	3.4	4.20115	5.516
1975-02-19	5	4.20115	5.516
1975-02-25	5.2	4.20115	5.516
1975-03-04	4.5	4.20115	5.516
1975-03-13	4.3	4.20115	5.516
1975-03-18	4.2	4.20115	5.516
1975-03-26	4.2	4.20115	5.516
1975-04-03	3.9	4.20115	5.516
1975-04-10	3.7	4.20115	5.516
1975-04-15	3.5	4.20115	5.516
1975-04-21	3.4	4.20115	5.516
1975-04-28	4.1	4.20115	5.516
1975-05-06	3.9	4.20115	5.516
1975-05-14	3.8	4.20115	5.516
1975-05-21	3.9	4.20115	5.516
1975-05-27	4.2	4.20115	5.516
1975-06-04	4.9	4.20115	5.516
1975-06-12	5.4	4.20115	5.516
1975-06-18	5	4.20115	5.516
1975-06-26	5.3	4.20115	5.516
1975-07-03	5	4.20115	5.516
1975-07-10	5.1	4.20115	5.516
1975-07-16	5	4.20115	5.516
1975-07-30	4.5	4.20115	5.516
1975-08-06	5.2	4.20115	5.516
1975-08-12	3.9	4.20115	5.516
1975-08-26	5.5	4.20115	5.516
1975-09-03	5.5	4.20115	5.516
1975-09-11	5	4.20115	5.516
1975-09-17	4.6	4.20115	5.516
1975-09-23	6.2	4.20115	5.516
1975-10-01	5.2	4.20115	5.516
1975-10-06	5.6	4.20115	5.516
1975-10-16	5.9	4.20115	5.516
1975-10-22	4.8	4.20115	5.516
1975-10-29	6.3	4.20115	5.516
1975-11-03	6.2	4.20115	5.516
1975-11-13	6.2	4.20115	5.516
1975-11-19	4.9	4.20115	5.516
1975-11-26	5.2	4.20115	5.516
1975-12-04	6.2	4.20115	5.516
1975-12-11	5.4	4.20115	5.516
1975-12-16	5.6	4.20115	5.516
1975-12-29	6.7	4.20115	5.516
1976-01-07	6	5.20144	7.62231
1976-01-14	5.7	5.20144	7.62231
1976-01-22	6.2	5.20144	7.62231
1976-01-28	5.7	5.20144	7.62231
1976-02-04	6.2	5.20144	7.62231
1976-02-11	5	5.20144	7.62231
1976-02-19	5.6	5.20144	7.62231
1976-02-25	4.3	5.20144	7.62231
1976-03-03	4.1	5.20144	7.62231
1976-03-10	4.3	5.20144	7.62231
1976-03-18	4.8	5.20144	7.62231
1976-03-24	4.4	5.20144	7.62231
1976-03-31	4.1	5.20144	7.62231
1976-04-07	2	5.20144	7.62231
1976-04-12	3.9	5.20144	7.62231
1976-04-21	5.2	5.20144	7.62231
1976-04-28	4.6	5.20144	7.62231
1976-05-05	4.3	5.20144	7.62231
1976-05-13	4.5	5.20144	7.62231
1976-05-20	5	5.20144	7.62231
1976-05-24	4.6	5.20144	7.62231
1976-06-02	3.9	5.20144	7.62231
1976-06-10	3.5	5.20144	7.62231
1976-06-17	4.6	5.20144	7.62231
1976-06-24	4.7	5.20144	7.62231
1976-06-30	5	5.20144	7.62231
1976-07-07	7.6	5.20144	7.62231
1976-07-15	5.1	5.20144	7.62231
1976-07-21	4.2	5.20144	7.62231
1976-07-28	4.7	5.20144	7.62231
1976-08-04	5.3	5.20144	7.62231
1976-08-12	6.3	5.20144	7.62231
1976-08-18	4.6	5.20144	7.62231
1976-08-25	5.7	5.20144	7.62231
1976-09-01	5.4	5.20144	7.62231
1976-09-09	6.1	5.20144	7.62231
1976-09-15	5.9	5.20144	7.62231
1976-09-22	5.4	5.20144	7.62231
1976-09-28	4.9	5.20144	7.62231
1976-10-06	6	5.20144	7.62231
1976-10-11	5.2	5.20144	7.62231
1976-10-20	5.6	5.20144	7.62231
1976-10-26	5.6	5.20144	7.62231
1976-11-02	6.3	5.20144	7.62231
1976-11-08	5.9	5.20144	7.62231
1976-11-16	6.8	5.20144	7.62231
1976-11-22	6	5.20144	7.62231
1976-12-01	6.1	5.20144	7.62231
1976-12-06	4.5	5.20144	7.62231
1976-12-15	6.1	5.20144	7.62231
1976-12-20	6.2	5.20144	7.62231
1976-12-28	5.5	5.20144	7.62231
1977-01-05	5.5	4.71502	5.60518
1977-01-13	5.6	4.71502	5.60518
1977-01-19	5.8	4.71502	5.60518
1977-01-27	8	4.71502	5.60518
1977-02-02	5	4.71502	5.60518
1977-02-10	5.3	4.71502	5.60518
1977-02-16	4.5	4.71502	5.60518
1977-02-24	4.4	4.71502	5.60518
1977-03-02	4.1	4.71502	5.60518
1977-03-10	4.3	4.71502	5.60518
1977-03-16	4.3	4.71502	5.60518
1977-03-24	4.6	4.71502	5.60518
1977-03-28	5.1	4.71502	5.60518
1977-04-05	4.5	4.71502	5.60518
1977-04-13	4.2	4.71502	5.60518
1977-04-21	4	4.71502	5.60518
1977-04-27	4.1	4.71502	5.60518
1977-05-05	3.7	4.71502	5.60518
1977-05-11	3.8	4.71502	5.60518
1977-05-25	3.5	4.71502	5.60518
1977-06-02	3.8	4.71502	5.60518
1977-06-08	3.79	4.71502	5.60518
1977-06-16	4.1	4.71502	5.60518
1977-06-22	3.76	4.71502	5.60518
1977-06-30	3.84	4.71502	5.60518
1977-07-06	3.76	4.71502	5.60518
1977-07-14	3.96	4.71502	5.60518
1977-07-25	3.72	4.71502	5.60518
1977-07-28	3.6	4.71502	5.60518
1977-08-04	4.9	4.71502	5.60518
1977-08-09	4.44	4.71502	5.60518
1977-08-15	3.64	4.71502	5.60518
1977-08-25	4.4	4.71502	5.60518
1977-08-31	3.94	4.71502	5.60518
1977-09-08	4.33	4.71502	5.60518
1977-09-14	4.55	4.71502	5.60518
1977-09-22	4.3	4.71502	5.60518
1977-09-28	4.14	4.71502	5.60518
1977-10-06	5.05	4.71502	5.60518
1977-10-12	4.26	4.71502	5.60518
1977-10-20	4.92	4.71502	5.60518
1977-10-26	5.33	4.71502	5.60518
1977-11-03	6.17	4.71502	5.60518
1977-11-09	4.12	4.71502	5.60518
1977-11-17	4.79	4.71502	5.60518
1977-11-23	4.83	4.71502	5.60518
1977-12-01	4.44	4.71502	5.60518
1977-12-07	4.31	4.71502	5.60518
1977-12-15	4.14	4.71502	5.60518
1977-12-21	3.99	4.71502	5.60518
1978-01-04	4.14	4.12302	5.23756
1978-01-12	4.38	4.12302	5.23756
1978-01-18	4.58	4.12302	5.23756
1978-01-26	4.79	4.12302	5.23756
1978-02-01	4.43	4.12302	5.23756
1978-02-09	4.36	4.12302	5.23756
1978-02-15	4.2	4.12302	5.23756
1978-02-23	4.5	4.12302	5.23756
1978-03-01	3.9	4.12302	5.23756
1978-03-09	3.41	4.12302	5.23756
1978-03-15	3.98	4.12302	5.23756
1978-03-21	4.24	4.12302	5.23756
1978-03-29	3.79	4.12302	5.23756
1978-04-06	3.25	4.12302	5.23756
1978-04-12	3.71	4.12302	5.23756
1978-04-20	4.19	4.12302	5.23756
1978-04-26	3.96	4.12302	5.23756
1978-05-02	4.17	4.12302	5.23756
1978-05-10	4.3	4.12302	5.23756
1978-05-18	3.92	4.12302	5.23756
1978-05-24	3.56	4.12302	5.23756
1978-06-01	3.84	4.12302	5.23756
1978-06-07	3.9	4.12302	5.23756
1978-06-15	4.09	4.12302	5.23756
1978-06-21	4.23	4.12302	5.23756
1978-06-29	3.75	4.12302	5.23756
1978-07-05	3.94	4.12302	5.23756
1978-07-11	3.75	4.12302	5.23756
1978-07-19	3.75	4.12302	5.23756
1978-07-27	3.88	4.12302	5.23756
1978-08-02	3.85	4.12302	5.23756
1978-08-10	3.77	4.12302	5.23756
1978-08-16	4.15	4.12302	5.23756
1978-08-24	4.6	4.12302	5.23756
1978-08-30	4.86	4.12302	5.23756
1978-09-07	4.76	4.12302	5.23756
1978-09-13	4.49	4.12302	5.23756
1978-09-19	4.76	4.12302	5.23756
1978-09-26	4.61	4.12302	5.23756
1978-10-05	4.26	4.12302	5.23756
1978-10-11	4.91	4.12302	5.23756
1978-10-16	4.73	4.12302	5.23756
1978-10-25	4.92	4.12302	5.23756
1978-11-02	5	4.12302	5.23756
1978-11-08	4.94	4.12302	5.23756
1978-11-16	5.15	4.12302	5.23756
1978-11-22	5.35	4.12302	5.23756
1978-11-30	6.19	4.12302	5.23756
1978-12-06	5.64	4.12302	5.23756
1978-12-14	5.36	4.12302	5.23756
1978-12-20	5.49	4.12302	5.23756
1978-12-27	4.66	4.12302	5.23756
1979-01-10	4.33	4.5165	4.54494
1979-01-18	5.09	4.5165	4.54494
1979-02-01	5.23	4.5165	4.54494
1979-02-08	4.94	4.5165	4.54494
1979-02-21	3.59	4.5165	4.54494
1979-03-01	4.47	4.5165	4.54494
1979-03-07	4.98	4.5165	4.54494
1979-03-15	4.58	4.5165	4.54494
1979-03-21	4	4.5165	4.54494
1979-03-29	3.85	4.5165	4.54494
1979-04-04	3.55	4.5165	4.54494
1979-04-18	3.96	4.5165	4.54494
1979-04-26	4.09	4.5165	4.54494
1979-05-03	3.76	4.5165	4.54494
1979-05-10	3.59	4.5165	4.54494
1979-05-16	3.6	4.5165	4.54494
1979-05-22	3.7	4.5165	4.54494
1979-05-30	3.55	4.5165	4.54494
1979-06-06	3.73	4.5165	4.54494
1979-06-13	4.28	4.5165	4.54494
1979-06-21	3.96	4.5165	4.54494
1979-06-27	4.1	4.5165	4.54494
1979-07-05	4.19	4.5165	4.54494
1979-07-11	5.15	4.5165	4.54494
1979-07-19	3.91	4.5165	4.54494
1979-07-25	4.19	4.5165	4.54494
1979-08-02	4.37	4.5165	4.54494
1979-08-08	3.96	4.5165	4.54494
1979-08-16	4.29	4.5165	4.54494
1979-08-22	4.23	4.5165	4.54494
1979-08-30	4.04	4.5165	4.54494
1979-09-05	4.64	4.5165	4.54494
1979-09-13	4.38	4.5165	4.54494
1979-09-19	4.2	4.5165	4.54494
1979-09-27	4.57	4.5165	4.54494
1979-10-01	5.01	4.5165	4.54494
1979-10-11	4.67	4.5165	4.54494
1979-10-15	5.74	4.5165	4.54494
1979-10-25	5.42	4.5165	4.54494
1979-10-31	5.2	4.5165	4.54494
1979-11-08	4.74	4.5165	4.54494
1979-11-14	4.52	4.5165	4.54494
1979-11-22	4.44	4.5165	4.54494
1979-11-28	4.87	4.5165	4.54494
1979-12-06	4.75	4.5165	4.54494
1979-12-12	7.2	4.5165	4.54494
1979-12-20	3.72	4.5165	4.54494
1980-01-02	3.95	3.96034	4.37028
1980-01-10	3.99	3.96034	4.37028
1980-01-16	3.96	3.96034	4.37028
1980-01-24	4.83	3.96034	4.37028
1980-01-30	4.49	3.96034	4.37028
1980-02-07	3.96	3.96034	4.37028
1980-02-13	3.42	3.96034	4.37028
1980-02-21	3.99	3.96034	4.37028
1980-02-27	4.23	3.96034	4.37028
1980-03-06	4.58	3.96034	4.37028
1980-03-12	4.33	3.96034	4.37028
1980-03-20	3.76	3.96034	4.37028
1980-03-26	4.08	3.96034	4.37028
1980-04-02	4.11	3.96034	4.37028
1980-04-10	4.08	3.96034	4.37028
1980-04-17	3.83	3.96034	4.37028
1980-04-24	4.59	3.96034	4.37028
1980-05-08	4.27	3.96034	4.37028
1980-05-21	4.07	3.96034	4.37028
1980-05-29	4.16	3.96034	4.37028
1980-06-04	4.75	3.96034	4.37028
1980-06-12	4.15	3.96034	4.37028
1980-06-18	4.18	3.96034	4.37028
1980-06-26	4.48	3.96034	4.37028
1980-07-02	4.09	3.96034	4.37028
1980-07-07	3.12	3.96034	4.37028
1980-07-16	3.45	3.96034	4.37028
1980-07-24	3.22	3.96034	4.37028
1980-07-30	3.13	3.96034	4.37028
1980-08-07	3.67	3.96034	4.37028
1980-08-13	3.6	3.96034	4.37028
1980-08-21	3.64	3.96034	4.37028
1980-08-27	4.24	3.96034	4.37028
1980-09-04	4.11	3.96034	4.37028
1980-09-11	4.26	3.96034	4.37028
1980-09-18	4.35	3.96034	4.37028
1980-09-24	4.37	3.96034	4.37028
1980-10-02	4.87	3.96034	4.37028
1980-10-08	4.64	3.96034	4.37028
1980-10-16	4.53	3.96034	4.37028
1980-10-23	4.51	3.96034	4.37028
1980-10-30	3.65	3.96034	4.37028
1980-11-05	4.01	3.96034	4.37028
1980-11-13	4.48	3.96034	4.37028
1980-11-19	4.42	3.96034	4.37028
1980-11-27	3.77	3.96034	4.37028
1980-12-03	4.07	3.96034	4.37028
1980-12-11	4.46	3.96034	4.37028
1980-12-17	4.35	3.96034	4.37028
1980-12-22	4.28	3.96034	4.37028
1980-12-30	3.35	3.96034	4.37028
1981-01-08	4	4.12711	3.88212
1981-01-13	4.02	4.12711	3.88212
1981-01-19	#N/A	4.12711	3.88212
1981-01-22	3.65	4.12711	3.88212
1981-01-27	3.62	4.12711	3.88212
1981-02-05	4.34	4.12711	3.88212
1981-02-10	3.67	4.12711	3.88212
1981-02-19	4.1	4.12711	3.88212
1981-02-24	4.36	4.12711	3.88212
1981-03-05	4.64	4.12711	3.88212
1981-03-10	4.37	4.12711	3.88212
1981-03-19	3.48	4.12711	3.88212
1981-03-24	3.82	4.12711	3.88212
1981-04-02	3.63	4.12711	3.88212
1981-04-07	3.75	4.12711	3.88212
1981-04-15	4.11	4.12711	3.88212
1981-04-22	4.17	4.12711	3.88212
1981-04-28	4.23	4.12711	3.88212
1981-05-14	3.82	4.12711	3.88212
1981-05-19	3.61	4.12711	3.88212
1981-05-26	3.93	4.12711	3.88212
1981-06-02	4.06	4.12711	3.88212
1981-06-11	3.34	4.12711	3.88212
1981-06-16	3.56	4.12711	3.88212
1981-06-25	4.23	4.12711	3.88212
1981-06-30	6.01	4.12711	3.88212
1981-07-09	3.92	4.12711	3.88212
1981-07-14	4.36	4.12711	3.88212
1981-07-23	4.04	4.12711	3.88212
1981-07-27	3.42	4.12711	3.88212
1981-08-06	4.87	4.12711	3.88212
1981-08-11	3.93	4.12711	3.88212
1981-08-20	4.03	4.12711	3.88212
1981-08-25	3.89	4.12711	3.88212
1981-09-03	4.39	4.12711	3.88212
1981-09-08	4.06	4.12711	3.88212
1981-09-17	4.02	4.12711	3.88212
1981-09-22	4.52	4.12711	3.88212
1981-10-01	3.99	4.12711	3.88212
1981-10-06	4.15	4.12711	3.88212
1981-10-15	3.69	4.12711	3.88212
1981-10-20	3.95	4.12711	3.88212
1981-10-29	3.67	4.12711	3.88212
1981-11-04	3.7	4.12711	3.88212
1981-11-12	3.72	4.12711	3.88212
1981-11-17	4.01	4.12711	3.88212
1981-11-26	4.32	4.12711	3.88212
1981-12-01	6.07	4.12711	3.88212
1981-12-10	4	4.12711	3.88212
1981-12-15	3.92	4.12711	3.88212
1981-12-21	3.47	4.12711	3.88212
1981-12-29	3.59	4.12711	3.88212
1982-01-07	3.23	3.9894	4.97155
1982-01-19	3.74	3.9894	4.97155
1982-01-25	4.39	3.9894	4.97155
1982-02-04	3.63	3.9894	4.97155
1982-02-09	3.77	3.9894	4.97155
1982-02-16	4.19	3.9894	4.97155
1982-02-23	4.4	3.9894	4.97155
1982-03-04	4.85	3.9894	4.97155
1982-03-09	4.08	3.9894	4.97155
1982-03-18	4.89	3.9894	4.97155
1982-03-23	3.46	3.9894	4.97155
1982-03-30	3.84	3.9894	4.97155
1982-04-06	4.67	3.9894	4.97155
1982-04-15	3.79	3.9894	4.97155
1982-04-20	3.88	3.9894	4.97155
1982-04-27	3.96	3.9894	4.97155
1982-05-13	3.5	3.9894	4.97155
1982-05-18	4.02	3.9894	4.97155
1982-05-27	3.88	3.9894	4.97155
1982-06-02	3.65	3.9894	4.97155
1982-06-10	3.95	3.9894	4.97155
1982-06-15	3.8	3.9894	4.97155
1982-06-24	4.51	3.9894	4.97155
1982-06-29	4.52	3.9894	4.97155
1982-07-08	3.69	3.9894	4.97155
1982-07-13	3.73	3.9894	4.97155
1982-07-22	3.79	3.9894	4.97155
1982-07-27	3.97	3.9894	4.97155
1982-08-05	4.02	3.9894	4.97155
1982-08-10	4.21	3.9894	4.97155
1982-08-19	4.25	3.9894	4.97155
1982-08-24	3.8	3.9894	4.97155
1982-09-02	4.3	3.9894	4.97155
1982-09-07	4.32	3.9894	4.97155
1982-09-16	4.1	3.9894	4.97155
1982-09-21	4.57	3.9894	4.97155
1982-09-30	4.03	3.9894	4.97155
1982-10-05	3.86	3.9894	4.97155
1982-10-14	4.67	3.9894	4.97155
1982-10-19	3.99	3.9894	4.97155
1982-10-27	4.1	3.9894	4.97155
1982-11-02	4.25	3.9894	4.97155
1982-11-11	4.33	3.9894	4.97155
1982-11-16	4.48	3.9894	4.97155
1982-11-25	4.01	3.9894	4.97155
1982-12-01	3.84	3.9894	4.97155
1982-12-09	4.12	3.9894	4.97155
1982-12-14	4.66	3.9894	4.97155
1982-12-23	3.83	3.9894	4.97155
1982-12-28	3.45	3.9894	4.97155
1983-01-06	4.23	3.90942	4.36531
1983-01-11	3.74	3.90942	4.36531
1983-01-20	3.74	3.90942	4.36531
1983-01-25	3.87	3.90942	4.36531
1983-02-03	4.31	3.90942	4.36531
1983-02-08	3.77	3.90942	4.36531
1983-02-17	3.83	3.90942	4.36531
1983-02-22	4.25	3.90942	4.36531
1983-03-03	4.41	3.90942	4.36531
1983-03-08	3.81	3.90942	4.36531
1983-03-17	4.24	3.90942	4.36531
1983-03-30	3.82	3.90942	4.36531
1983-04-06	3.74	3.90942	4.36531
1983-04-14	2.99	3.90942	4.36531
1983-04-19	2.91	3.90942	4.36531
1983-04-28	3.28	3.90942	4.36531
1983-05-02	3.16	3.90942	4.36531
1983-05-17	3.47	3.90942	4.36531
1983-05-26	4.17	3.90942	4.36531
1983-06-01	2.92	3.90942	4.36531
1983-06-09	2.5	3.90942	4.36531
1983-06-14	3.71	3.90942	4.36531
1983-06-23	3.67	3.90942	4.36531
1983-06-28	3.78	3.90942	4.36531
1983-07-06	3.88	3.90942	4.36531
1983-07-12	4.05	3.90942	4.36531
1983-07-21	3.72	3.90942	4.36531
1983-07-26	3.58	3.90942	4.36531
1983-08-04	3.91	3.90942	4.36531
1983-08-09	4.3	3.90942	4.36531
1983-08-18	4.06	3.90942	4.36531
1983-08-23	4.42	3.90942	4.36531
1983-09-01	4.21	3.90942	4.36531
1983-09-06	4.43	3.90942	4.36531
1983-09-15	4.38	3.90942	4.36531
1983-09-20	4.34	3.90942	4.36531
1983-09-29	4.44	3.90942	4.36531
1983-10-04	4.64	3.90942	4.36531
1983-10-13	5.15	3.90942	4.36531
1983-10-18	6.13	3.90942	4.36531
1983-10-27	4.9	3.90942	4.36531
1983-11-01	5.23	3.90942	4.36531
1983-11-10	5.16	3.90942	4.36531
1983-11-15	5.28	3.90942	4.36531
1983-11-24	5.6	3.90942	4.36531
1983-11-29	6.13	3.90942	4.36531
1983-12-08	4.96	3.90942	4.36531
1983-12-13	5.07	3.90942	4.36531
1983-12-22	5.06	3.90942	4.36531
1983-12-28	6.24	3.90942	4.36531
1984-01-05	5.73	4.52601	4.23158
1984-01-10	4.77	4.52601	4.23158
1984-01-19	4.52	4.52601	4.23158
1984-01-24	4.25	4.52601	4.23158
1984-02-02	4.45	4.52601	4.23158
1984-02-07	5.36	4.52601	4.23158
1984-02-16	3.87	4.52601	4.23158
1984-02-21	4.34	4.52601	4.23158
1984-03-01	4.86	4.52601	4.23158
1984-03-08	4.46	4.52601	4.23158
1984-03-15	4.52	4.52601	4.23158
1984-03-20	4.8	4.52601	4.23158
1984-03-29	4.71	4.52601	4.23158
1984-04-03	4.09	4.52601	4.23158
1984-04-12	4.1	4.52601	4.23158
1984-04-17	4.33	4.52601	4.23158
1984-04-26	4.02	4.52601	4.23158
1984-05-02	3.94	4.52601	4.23158
1984-05-10	4.3	4.52601	4.23158
1984-05-15	4.2	4.52601	4.23158
1984-05-24	4.74	4.52601	4.23158
1984-05-29	4.75	4.52601	4.23158
1984-06-07	4.05	4.52601	4.23158
1984-06-13	4.24	4.52601	4.23158
1984-06-21	3.82	4.52601	4.23158
1984-06-26	3.89	4.52601	4.23158
1984-07-05	4.27	4.52601	4.23158
1984-07-10	3.86	4.52601	4.23158
1984-07-19	4.16	4.52601	4.23158
1984-07-24	3.99	4.52601	4.23158
1984-08-02	4.18	4.52601	4.23158
1984-08-07	4.07	4.52601	4.23158
1984-08-16	4.58	4.52601	4.23158
1984-08-21	4.14	4.52601	4.23158
1984-08-30	4.09	4.52601	4.23158
1984-09-04	4.24	4.52601	4.23158
1984-09-13	4.03	4.52601	4.23158
1984-09-18	4.3	4.52601	4.23158
1984-09-27	4.15	4.52601	4.23158
1984-10-02	5.58	4.52601	4.23158
1984-10-11	4.02	4.52601	4.23158
1984-10-16	4.19	4.52601	4.23158
1984-10-25	3.7	4.52601	4.23158
1984-10-30	3.8	4.52601	4.23158
1984-11-08	3.77	4.52601	4.23158
1984-11-13	4.13	4.52601	4.23158
1984-11-22	4.07	4.52601	4.23158
1984-11-27	4.2	4.52601	4.23158
1984-12-06	4.02	4.52601	4.23158
1984-12-11	4.18	4.52601	4.23158
1984-12-20	5.87	4.52601	4.23158
1985-01-03	4.32	4.63068	6.15165
1985-01-17	5.08	4.63068	6.15165
1985-01-22	5.96	4.63068	6.15165
1985-01-31	4.46	4.63068	6.15165
1985-02-05	4.32	4.63068	6.15165
1985-02-14	4.46	4.63068	6.15165
1985-02-21	4.81	4.63068	6.15165
1985-02-28	5.85	4.63068	6.15165
1985-03-05	4.91	4.63068	6.15165
1985-03-14	4.71	4.63068	6.15165
1985-03-19	4.73	4.63068	6.15165
1985-03-28	5.75	4.63068	6.15165
1985-04-02	4.69	4.63068	6.15165
1985-04-11	4.3	4.63068	6.15165
1985-04-16	4.97	4.63068	6.15165
1985-04-25	4.13	4.63068	6.15165
1985-05-02	4.18	4.63068	6.15165
1985-05-09	4.18	4.63068	6.15165
1985-05-14	4.31	4.63068	6.15165
1985-05-23	4.19	4.63068	6.15165
1985-05-28	3.77	4.63068	6.15165
1985-06-10	3.31	4.63068	6.15165
1985-06-20	3.89	4.63068	6.15165
1985-06-25	4.16	4.63068	6.15165
1985-07-04	4.08	4.63068	6.15165
1985-07-09	3.73	4.63068	6.15165
1985-07-18	3.81	4.63068	6.15165
1985-07-23	3.94	4.63068	6.15165
1985-08-01	4.08	4.63068	6.15165
1985-08-06	4.24	4.63068	6.15165
1985-08-15	4.17	4.63068	6.15165
1985-08-20	4.32	4.63068	6.15165
1985-08-29	4.13	4.63068	6.15165
1985-09-03	3.94	4.63068	6.15165
1985-09-12	4.4	4.63068	6.15165
1985-09-17	4.18	4.63068	6.15165
1985-09-26	4.35	4.63068	6.15165
1985-10-01	4.8	4.63068	6.15165
1985-10-10	5.78	4.63068	6.15165
1985-10-15	4.23	4.63068	6.15165
1985-10-24	5.1	4.63068	6.15165
1985-10-29	5.12	4.63068	6.15165
1985-11-12	5.83	4.63068	6.15165
1985-11-20	#N/A	4.63068	6.15165
1985-11-26	4.96	4.63068	6.15165
1985-12-05	5.19	4.63068	6.15165
1985-12-10	5.29	4.63068	6.15165
1986-01-07	5.37	5.14095	5.13268
1986-01-16	7.04	5.14095	5.13268
1986-01-21	6.7	5.14095	5.13268
1986-01-30	4.4	5.14095	5.13268
1986-02-04	4.51	5.14095	5.13268
1986-02-13	4.8	5.14095	5.13268
1986-02-18	5.01	5.14095	5.13268
1986-02-27	5.11	5.14095	5.13268
1986-03-04	5.5	5.14095	5.13268
1986-03-13	5.34	5.14095	5.13268
1986-03-18	4.99	5.14095	5.13268
1986-03-25	6.08	5.14095	5.13268
1986-04-01	7.3	5.14095	5.13268
1986-04-10	4.04	5.14095	5.13268
1986-04-15	4.19	5.14095	5.13268
1986-04-24	4.23	5.14095	5.13268
1986-04-28	4.21	5.14095	5.13268
1986-05-06	3.62	5.14095	5.13268
1986-05-13	3.87	5.14095	5.13268
1986-05-22	3.44	5.14095	5.13268
1986-05-27	3.89	5.14095	5.13268
1986-06-10	4.5	5.14095	5.13268
1986-06-19	3.69	5.14095	5.13268
1986-06-24	3.9	5.14095	5.13268
1986-07-03	3.56	5.14095	5.13268
1986-07-08	3.82	5.14095	5.13268
1986-07-18	3.71	5.14095	5.13268
1986-07-22	3.56	5.14095	5.13268
1986-07-31	3.84	5.14095	5.13268
1986-08-05	4.25	5.14095	5.13268
1986-08-14	3.98	5.14095	5.13268
1986-08-19	3.77	5.14095	5.13268
1986-08-28	4.13	5.14095	5.13268
1986-09-02	4.48	5.14095	5.13268
1986-09-11	4.16	5.14095	5.13268
1986-09-25	3.82	5.14095	5.13268
1986-09-30	3.86	5.14095	5.13268
1986-10-09	4.54	5.14095	5.13268
1986-10-14	4.69	5.14095	5.13268
1986-10-23	5.64	5.14095	5.13268
1986-10-28	4.45	5.14095	5.13268
1986-11-06	4.38	5.14095	5.13268
1986-11-12	4.33	5.14095	5.13268
1986-11-20	4.47	5.14095	5.13268
1986-11-25	4	5.14095	5.13268
1986-12-04	4.38	5.14095	5.13268
1986-12-09	4.69	5.14095	5.13268
1986-12-18	5.11	5.14095	5.13268
1987-01-13	4.46	4.48726	4.59773
1987-01-20	4.8	4.48726	4.59773
1987-02-03	5.83	4.48726	4.59773
1987-02-10	5.8	4.48726	4.59773
1987-02-17	5.24	4.48726	4.59773
1987-02-25	5.11	4.48726	4.59773
1987-03-03	5.4	4.48726	4.59773
1987-03-10	4.6	4.48726	4.59773
1987-03-17	4.69	4.48726	4.59773
1987-03-24	5.72	4.48726	4.59773
1987-03-31	4.6	4.48726	4.59773
1987-04-07	4.7	4.48726	4.59773
1987-04-14	4.56	4.48726	4.59773
1987-04-21	4.46	4.48726	4.59773
1987-04-28	4.27	4.48726	4.59773
1987-05-06	4.25	4.48726	4.59773
1987-05-12	4.33	4.48726	4.59773
1987-05-19	4.36	4.48726	4.59773
1987-05-26	3.98	4.48726	4.59773
1987-06-02	4.07	4.48726	4.59773
1987-06-09	4.21	4.48726	4.59773
1987-06-16	4.06	4.48726	4.59773
1987-06-23	4.28	4.48726	4.59773
1987-06-30	4.06	4.48726	4.59773
1987-07-07	4.18	4.48726	4.59773
1987-07-14	3.76	4.48726	4.59773
1987-07-21	4	4.48726	4.59773
1987-07-28	3.81	4.48726	4.59773
1987-08-04	3.74	4.48726	4.59773
1987-08-11	3.72	4.48726	4.59773
1987-08-18	3.88	4.48726	4.59773
1987-08-25	4.17	4.48726	4.59773
1987-09-01	4.19	4.48726	4.59773
1987-09-08	4.53	4.48726	4.59773
1987-09-16	4.01	4.48726	4.59773
1987-09-22	4.36	4.48726	4.59773
1987-09-29	3.9	4.48726	4.59773
1987-10-06	4.14	4.48726	4.59773
1987-10-13	3.95	4.48726	4.59773
1987-10-20	3.38	4.48726	4.59773
1987-10-27	3.83	4.48726	4.59773
1987-11-03	3.92	4.48726	4.59773
1987-11-10	4.49	4.48726	4.59773
1987-11-17	4.37	4.48726	4.59773
1987-11-24	4.36	4.48726	4.59773
1987-12-01	4.35	4.48726	4.59773
1987-12-08	4.21	4.48726	4.59773
1987-12-22	4.38	4.48726	4.59773
1987-12-29	4.32	4.48726	4.59773
1988-01-12	4.29	4.11727	4.68479
1988-01-26	5.01	4.11727	4.68479
1988-02-09	3.85	4.11727	4.68479
1988-02-23	4.03	4.11727	4.68479
1988-03-08	4.79	4.11727	4.68479
1988-03-22	3.79	4.11727	4.68479
1988-04-05	3.27	4.11727	4.68479
1988-04-19	4.24	4.11727	4.68479
1988-05-03	4.01	4.11727	4.68479
1988-05-17	4.12	4.11727	4.68479
1988-05-31	4.86	4.11727	4.68479
1988-06-28	4.2	4.11727	4.68479
1988-07-12	3.29	4.11727	4.68479
1988-07-26	3.89	4.11727	4.68479
1988-08-09	3.42	4.11727	4.68479
1988-08-23	4.04	4.11727	4.68479
1988-09-06	3.63	4.11727	4.68479
1988-09-20	3.18	4.11727	4.68479
1988-10-04	#N/A	4.11727	4.68479
1988-10-18	3.26	4.11727	4.68479
1988-11-01	3.58	4.11727	4.68479
1988-11-15	4.15	4.11727	4.68479
1988-11-29	4.74	4.11727	4.68479
1988-12-13	3.87	4.11727	4.68479
1988-12-27	3.97	4.11727	4.68479
1989-01-10	4.21	4.38965	6.26868
1989-01-24	4.47	4.38965	6.26868
1989-02-08	5.36	4.38965	6.26868
1989-02-21	4.89	4.38965	6.26868
1989-03-07	3.96	4.38965	6.26868
1989-03-21	4.36	4.38965	6.26868
1989-04-04	4.19	4.38965	6.26868
1989-04-18	4.27	4.38965	6.26868
1989-05-02	3.86	4.38965	6.26868
1989-05-16	3.68	4.38965	6.26868
1989-05-30	3.87	4.38965	6.26868
1989-06-13	4.74	4.38965	6.26868
1989-06-27	3.89	4.38965	6.26868
1989-07-11	4.13	4.38965	6.26868
1989-07-25	4.53	4.38965	6.26868
1989-08-08	4.53	4.38965	6.26868
1989-08-22	4.34	4.38965	6.26868
1989-09-19	4.08	4.38965	6.26868
1989-10-03	4.56	4.38965	6.26868
1989-10-18	4.95	4.38965	6.26868
1989-10-31	4.4	4.38965	6.26868
1989-11-14	4.08	4.38965	6.26868
1989-11-28	4.92	4.38965	6.26868
1989-12-12	6.01	4.38965	6.26868
1989-12-27	5.33	4.38965	6.26868
1990-01-09	5.04	4.23367	6.92717
1990-01-23	5.13	4.23367	6.92717
1990-02-06	4.05	4.23367	6.92717
1990-02-20	3.95	4.23367	6.92717
1990-03-06	4.04	4.23367	6.92717
1990-03-20	4.42	4.23367	6.92717
1990-04-03	4.22	4.23367	6.92717
1990-04-17	3.8	4.23367	6.92717
1990-05-02	3.77	4.23367	6.92717
1990-05-15	3.47	4.23367	6.92717
1990-05-29	3.67	4.23367	6.92717
1990-06-12	4.18	4.23367	6.92717
1990-06-26	4.07	4.23367	6.92717
1990-07-10	3.53	4.23367	6.92717
1990-07-24	3.87	4.23367	6.92717
1990-08-07	3.07	4.23367	6.92717
1990-08-29	3.93	4.23367	6.92717
1990-09-04	3.25	4.23367	6.92717
1990-09-18	3.64	4.23367	6.92717
1990-10-02	4.47	4.23367	6.92717
1990-10-16	4.28	4.23367	6.92717
1990-10-30	4.6	4.23367	6.92717
1990-11-13	4.54	4.23367	6.92717
1990-11-28	4.57	4.23367	6.92717
1990-12-11	5.09	4.23367	6.92717
1990-12-19	5.28	4.23367	6.92717
1991-01-08	4.03	4.32811	6.5799
1991-01-22	4.3	4.32811	6.5799
1991-02-05	5.16	4.32811	6.5799
1991-02-19	5.37	4.32811	6.5799
1991-03-05	4.71	4.32811	6.5799
1991-03-19	4.61	4.32811	6.5799
1991-04-02	4.39	4.32811	6.5799
1991-04-16	4.05	4.32811	6.5799
1991-05-02	3.86	4.32811	6.5799
1991-05-14	4.17	4.32811	6.5799
1991-05-28	3.57	4.32811	6.5799
1991-06-11	3.22	4.32811	6.5799
1991-06-25	4.09	4.32811	6.5799
1991-07-09	4.47	4.32811	6.5799
1991-07-23	5.13	4.32811	6.5799
1991-08-06	4	4.32811	6.5799
1991-08-20	3.49	4.32811	6.5799
1991-09-03	3.56	4.32811	6.5799
1991-09-17	4.33	4.32811	6.5799
1991-10-01	4.76	4.32811	6.5799
1991-10-15	4.77	4.32811	6.5799
1991-10-29	4.11	4.32811	6.5799
1991-11-12	5.14	4.32811	6.5799
1991-11-26	4.67	4.32811	6.5799
1991-12-10	5.3	4.32811	6.5799
1992-01-21	4.96	4.68963	6.47204
1992-02-04	5.81	4.68963	6.47204
1992-02-18	5	4.68963	6.47204
1992-03-03	4.95	4.68963	6.47204
1992-03-17	5.19	4.68963	6.47204
1992-03-31	4.82	4.68963	6.47204
1992-04-14	4.31	4.68963	6.47204
1992-04-28	4.71	4.68963	6.47204
1992-05-12	4.04	4.68963	6.47204
1992-05-26	3.6	4.68963	6.47204
1992-06-09	4.85	4.68963	6.47204
1992-06-23	3.85	4.68963	6.47204
1992-07-07	4.51	4.68963	6.47204
1992-07-21	4.53	4.68963	6.47204
1992-08-04	4.26	4.68963	6.47204
1992-08-18	3.77	4.68963	6.47204
1992-09-01	4.28	4.68963	6.47204
1992-09-15	4.01	4.68963	6.47204
1992-09-29	4.04	4.68963	6.47204
1992-10-13	4.78	4.68963	6.47204
1992-10-27	4.44	4.68963	6.47204
1992-11-10	4.56	4.68963	6.47204
1992-11-24	5.39	4.68963	6.47204
1992-12-08	4.37	4.68963	6.47204
1992-12-22	4.4	4.68963	6.47204
1993-01-05	4.9	5.4302	6.42594
1993-01-13	6.75	5.4302	6.42594
1993-01-19	4.66	5.4302	6.42594
1993-01-26	4.96	5.4302	6.42594
1993-02-02	4.39	5.4302	6.42594
1993-02-09	3.81	5.4302	6.42594
1993-02-16	4.87	5.4302	6.42594
1993-02-23	4.93	5.4302	6.42594
1993-03-02	5.33	5.4302	6.42594
1993-03-09	4.58	5.4302	6.42594
1993-03-16	4.44	5.4302	6.42594
1993-03-23	4.22	5.4302	6.42594
1993-03-30	4.33	5.4302	6.42594
1993-04-06	4.61	5.4302	6.42594
1993-04-13	5.11	5.4302	6.42594
1993-04-20	4.26	5.4302	6.42594
1993-04-27	4.39	5.4302	6.42594
1993-05-03	7.17	5.4302	6.42594
1993-05-11	4.46	5.4302	6.42594
1993-05-18	3.84	5.4302	6.42594
1993-05-25	3.72	5.4302	6.42594
1993-06-01	4.03	5.4302	6.42594
1993-06-08	4.29	5.4302	6.42594
1993-06-15	4.62	5.4302	6.42594
1993-06-22	4.26	5.4302	6.42594
1993-06-29	4.01	5.4302	6.42594
1993-07-06	5.09	5.4302	6.42594
1993-07-13	3.65	5.4302	6.42594
1993-07-20	4.03	5.4302	6.42594
1993-07-27	4.76	5.4302	6.42594
1993-08-03	3.57	5.4302	6.42594
1993-08-10	3.82	5.4302	6.42594
1993-08-17	3.44	5.4302	6.42594
1993-08-24	3.26	5.4302	6.42594
1993-08-31	3.56	5.4302	6.42594
1993-09-07	4.39	5.4302	6.42594
1993-09-14	5.32	5.4302	6.42594
1993-09-21	3.57	5.4302	6.42594
1993-09-28	4.28	5.4302	6.42594
1993-10-05	5.15	5.4302	6.42594
1993-10-12	3.88	5.4302	6.42594
1993-10-19	4.42	5.4302	6.42594
1993-10-26	4.13	5.4302	6.42594
1993-11-02	4.36	5.4302	6.42594
1993-11-09	5.08	5.4302	6.42594
1993-11-16	5.11	5.4302	6.42594
1993-11-23	5.07	5.4302	6.42594
1993-11-30	4.68	5.4302	6.42594
1993-12-07	5.45	5.4302	6.42594
1993-12-14	7.88	5.4302	6.42594
1993-12-28	4.63	5.4302	6.42594
1994-01-04	4.74	4.47457	4.91374
1994-02-01	4.48	4.47457	4.91374
1994-02-08	3.93	4.47457	4.91374
1994-02-15	5.15	4.47457	4.91374
1994-02-22	4.84	4.47457	4.91374
1994-03-01	5.9	4.47457	4.91374
1994-03-08	4.98	4.47457	4.91374
1994-03-15	4.46	4.47457	4.91374
1994-03-22	4.09	4.47457	4.91374
1994-03-29	4.77	4.47457	4.91374
1994-04-05	4.14	4.47457	4.91374
1994-04-12	5.28	4.47457	4.91374
1994-04-19	3.82	4.47457	4.91374
1994-04-26	3.62	4.47457	4.91374
1994-05-03	4.84	4.47457	4.91374
1994-05-10	4.94	4.47457	4.91374
1994-05-17	3.83	4.47457	4.91374
1994-05-24	4.18	4.47457	4.91374
1994-05-31	4.04	4.47457	4.91374
1994-06-07	3.86	4.47457	4.91374
1994-06-14	4.04	4.47457	4.91374
1994-06-21	4.29	4.47457	4.91374
1994-06-28	5.3	4.47457	4.91374
1994-07-05	3.54	4.47457	4.91374
1994-07-12	3.24	4.47457	4.91374
1994-07-19	4.3	4.47457	4.91374
1994-07-26	3.82	4.47457	4.91374
1994-08-02	3.46	4.47457	4.91374
1994-08-09	2.86	4.47457	4.91374
1994-08-16	3.7	4.47457	4.91374
1994-08-23	3.83	4.47457	4.91374
1994-08-30	3.51	4.47457	4.91374
1994-09-06	4.17	4.47457	4.91374
1994-09-13	3.54	4.47457	4.91374
1994-09-20	4.81	4.47457	4.91374
1994-09-27	4.7	4.47457	4.91374
1994-10-04	4.47	4.47457	4.91374
1994-10-11	4.32	4.47457	4.91374
1994-10-18	6.18	4.47457	4.91374
1994-10-25	5.98	4.47457	4.91374
1994-11-01	4.08	4.47457	4.91374
1994-11-08	3.99	4.47457	4.91374
1994-11-15	4.43	4.47457	4.91374
1994-11-22	4.19	4.47457	4.91374
1994-11-29	3.76	4.47457	4.91374
1994-12-06	4.64	4.47457	4.91374
1994-12-13	4.58	4.47457	4.91374
1994-12-20	4.55	4.47457	4.91374
1994-12-27	4.75	4.47457	4.91374
1995-01-03	4.62	4.74693	4.59308
1995-01-10	5.35	4.74693	4.59308
1995-01-17	5.39	4.74693	4.59308
1995-02-07	4.35	4.74693	4.59308
1995-02-14	#N/A	4.74693	4.59308
1995-02-21	5.97	4.74693	4.59308
1995-02-28	7.5	4.74693	4.59308
1995-03-07	3.62	4.74693	4.59308
1995-03-14	3.89	4.74693	4.59308
1995-03-21	5.26	4.74693	4.59308
1995-03-28	3.63	4.74693	4.59308
1995-04-04	3.59	4.74693	4.59308
1995-04-11	3.36	4.74693	4.59308
1995-04-18	4.56	4.74693	4.59308
1995-04-25	3.91	4.74693	4.59308
1995-05-02	3.73	4.74693	4.59308
1995-05-09	3.66	4.74693	4.59308
1995-05-16	4.11	4.74693	4.59308
1995-05-23	4.71	4.74693	4.59308
1995-05-30	4.4	4.74693	4.59308
1995-06-13	3.92	4.74693	4.59308
1995-06-20	4.23	4.74693	4.59308
1995-06-27	4.09	4.74693	4.59308
1995-07-04	4.08	4.74693	4.59308
1995-07-11	4.9	4.74693	4.59308
1995-07-18	4.21	4.74693	4.59308
1995-07-25	3.9	4.74693	4.59308
1995-08-01	4.17	4.74693	4.59308
1995-08-08	3.92	4.74693	4.59308
1995-08-22	4.87	4.74693	4.59308
1995-08-29	5.07	4.74693	4.59308
1995-09-05	4.53	4.74693	4.59308
1995-09-12	4.42	4.74693	4.59308
1995-09-19	3.79	4.74693	4.59308
1995-09-26	4.28	4.74693	4.59308
1995-10-03	4.36	4.74693	4.59308
1995-10-10	#N/A	4.74693	4.59308
1995-10-17	3.37	4.74693	4.59308
1995-10-24	4.23	4.74693	4.59308
1995-10-31	4.66	4.74693	4.59308
1995-11-07	4.4	4.74693	4.59308
1995-11-14	4.33	4.74693	4.59308
1995-11-21	4.78	4.74693	4.59308
1995-11-28	4.06	4.74693	4.59308
1995-12-05	4.91	4.74693	4.59308
1995-12-12	5.23	4.74693	4.59308
1995-12-27	5.94	4.74693	4.59308
1996-01-02	4.9	5.27405	9.27681
1996-01-09	5.26	5.27405	9.27681
1996-01-16	5.54	5.27405	9.27681
1996-01-23	5.02	5.27405	9.27681
1996-01-30	5.13	5.27405	9.27681
1996-02-06	5.32	5.27405	9.27681
1996-02-13	6.26	5.27405	9.27681
1996-02-20	7.18	5.27405	9.27681
1996-02-27	6.15	5.27405	9.27681
1996-03-05	5.11	5.27405	9.27681
1996-03-12	5	5.27405	9.27681
1996-03-19	4.85	5.27405	9.27681
1996-03-26	4.52	5.27405	9.27681
1996-04-02	4.79	5.27405	9.27681
1996-04-09	4.83	5.27405	9.27681
1996-04-16	4.26	5.27405	9.27681
1996-04-23	4.28	5.27405	9.27681
1996-04-29	4.34	5.27405	9.27681
1996-05-07	4.83	5.27405	9.27681
1996-05-14	4.42	5.27405	9.27681
1996-05-21	4.72	5.27405	9.27681
1996-05-28	4.38	5.27405	9.27681
1996-06-04	3.61	5.27405	9.27681
1996-06-11	4.25	5.27405	9.27681
1996-06-18	4.12	5.27405	9.27681
1996-06-25	4.62	5.27405	9.27681
1996-07-02	4.97	5.27405	9.27681
1996-07-09	4.24	5.27405	9.27681
1996-07-16	4.04	5.27405	9.27681
1996-07-23	5.41	5.27405	9.27681
1996-07-30	3.54	5.27405	9.27681
1996-08-06	3.87	5.27405	9.27681
1996-08-13	4.22	5.27405	9.27681
1996-08-20	3.5	5.27405	9.27681
1996-08-27	3.91	5.27405	9.27681
1996-09-03	5.17	5.27405	9.27681
1996-09-10	5.89	5.27405	9.27681
1996-09-17	7.34	5.27405	9.27681
1996-09-24	5.16	5.27405	9.27681
1996-10-01	5.94	5.27405	9.27681
1996-10-08	4.21	5.27405	9.27681
1996-10-15	4.56	5.27405	9.27681
1996-10-22	5.34	5.27405	9.27681
1996-10-29	5.13	5.27405	9.27681
1996-11-05	4.36	5.27405	9.27681
1996-11-12	4.36	5.27405	9.27681
1996-11-19	5.08	5.27405	9.27681
1996-11-26	5.25	5.27405	9.27681
1996-12-03	5.39	5.27405	9.27681
1996-12-10	5.22	5.27405	9.27681
1996-12-17	4.93	5.27405	9.27681
1996-12-24	4.62	5.27405	9.27681
1996-12-30	5.1	5.27405	9.27681
1997-01-07	4.96	4.71995	6.57191
1997-01-14	5.74	4.71995	6.57191
1997-01-21	5.33	4.71995	6.57191
1997-01-28	5.06	4.71995	6.57191
1997-02-04	5.08	4.71995	6.57191
1997-02-11	5.71	4.71995	6.57191
1997-02-18	5.92	4.71995	6.57191
1997-02-25	4.36	4.71995	6.57191
1997-03-04	5.1	4.71995	6.57191
1997-03-11	#N/A	4.71995	6.57191
1997-03-18	4.58	4.71995	6.57191
1997-03-25	4.62	4.71995	6.57191
1997-04-01	4.69	4.71995	6.57191
1997-04-08	4.4	4.71995	6.57191
1997-04-15	5.72	4.71995	6.57191
1997-04-22	4.12	4.71995	6.57191
1997-04-28	5.04	4.71995	6.57191
1997-05-06	#N/A	4.71995	6.57191
1997-05-13	3.58	4.71995	6.57191
1997-05-20	3.51	4.71995	6.57191
1997-05-27	3.59	4.71995	6.57191
1997-06-03	3.3	4.71995	6.57191
1997-06-10	2.57	4.71995	6.57191
1997-06-17	3.78	4.71995	6.57191
1997-06-24	3.84	4.71995	6.57191
1997-07-01	3.75	4.71995	6.57191
1997-07-08	3.21	4.71995	6.57191
1997-07-15	3.93	4.71995	6.57191
1997-07-22	3.97	4.71995	6.57191
1997-07-29	4	4.71995	6.57191
1997-08-05	3.64	4.71995	6.57191
1997-08-12	3.69	4.71995	6.57191
1997-08-19	3.7	4.71995	6.57191
1997-08-26	4.57	4.71995	6.57191
1997-09-02	5.68	4.71995	6.57191
1997-09-16	4.83	4.71995	6.57191
1997-09-23	5.19	4.71995	6.57191
1997-09-30	4.88	4.71995	6.57191
1997-10-07	#N/A	4.71995	6.57191
1997-10-14	4.81	4.71995	6.57191
1997-10-21	3.83	4.71995	6.57191
1997-11-04	5.64	4.71995	6.57191
1997-11-11	4.44	4.71995	6.57191
1997-11-18	3.63	4.71995	6.57191
1997-11-25	4.5	4.71995	6.57191
1997-12-02	4.84	4.71995	6.57191
1997-12-09	4.93	4.71995	6.57191
1997-12-16	5.01	4.71995	6.57191
1997-12-22	5.03	4.71995	6.57191
1997-12-23	5.03	4.71995	6.57191
1997-12-30	6.22	4.71995	6.57191
1998-01-06	5.48	4.89199	4.63733
1998-01-13	4.55	4.89199	4.63733
1998-01-20	4.7	4.89199	4.63733
1998-01-27	4.81	4.89199	4.63733
1998-02-03	4.83	4.89199	4.63733
1998-02-10	5.1	4.89199	4.63733
1998-02-17	5.59	4.89199	4.63733
1998-02-24	4.95	4.89199	4.63733
1998-03-03	5.53	4.89199	4.63733
1998-03-10	5.87	4.89199	4.63733
1998-03-17	5.13	4.89199	4.63733
1998-03-24	4.54	4.89199	4.63733
1998-03-31	4.84	4.89199	4.63733
1998-04-07	4.24	4.89199	4.63733
1998-04-14	4.41	4.89199	4.63733
1998-04-21	5.18	4.89199	4.63733
1998-04-28	4.74	4.89199	4.63733
1998-05-06	3.98	4.89199	4.63733
1998-05-12	3.49	4.89199	4.63733
1998-05-19	4.06	4.89199	4.63733
1998-05-26	4	4.89199	4.63733
1998-06-02	3.99	4.89199	4.63733
1998-06-09	3.66	4.89199	4.63733
1998-06-16	4.64	4.89199	4.63733
1998-06-23	4.13	4.89199	4.63733
1998-06-30	3.93	4.89199	4.63733
1998-07-07	4.25	4.89199	4.63733
1998-07-14	4.08	4.89199	4.63733
1998-07-21	6.81	4.89199	4.63733
1998-07-28	4.04	4.89199	4.63733
1998-08-04	4.43	4.89199	4.63733
1998-08-11	4.62	4.89199	4.63733
1998-08-18	4.31	4.89199	4.63733
1998-08-25	4.22	4.89199	4.63733
1998-09-01	3.72	4.89199	4.63733
1998-09-08	3.65	4.89199	4.63733
1998-09-15	5.71	4.89199	4.63733
1998-09-22	4.4	4.89199	4.63733
1998-09-29	4.85	4.89199	4.63733
1998-10-06	4.32	4.89199	4.63733
1998-10-13	4.45	4.89199	4.63733
1998-10-20	4.58	4.89199	4.63733
1998-10-27	5.59	4.89199	4.63733
1998-11-03	5.51	4.89199	4.63733
1998-11-10	4.29	4.89199	4.63733
1998-11-17	4.78	4.89199	4.63733
1998-11-24	4.65	4.89199	4.63733
1998-12-01	5.17	4.89199	4.63733
1998-12-08	5.03	4.89199	4.63733
1998-12-15	4.79	4.89199	4.63733
1998-12-22	4.54	4.89199	4.63733
1998-12-29	4.4	4.89199	4.63733
1999-01-05	4.23	3.91669	5.44847
1999-01-12	4.23	3.91669	5.44847
1999-01-19	4.35	3.91669	5.44847
1999-01-26	5.04	3.91669	5.44847
1999-02-02	4.83	3.91669	5.44847
1999-02-09	5.08	3.91669	5.44847
1999-02-16	4.4	3.91669	5.44847
1999-02-23	4.66	3.91669	5.44847
1999-03-02	3.98	3.91669	5.44847
1999-03-09	4.33	3.91669	5.44847
1999-03-16	3.9	3.91669	5.44847
1999-03-23	4.28	3.91669	5.44847
1999-03-30	4.34	3.91669	5.44847
1999-04-06	4.34	3.91669	5.44847
1999-04-13	4.72	3.91669	5.44847
1999-04-20	4.17	3.91669	5.44847
1999-04-27	4.41	3.91669	5.44847
1999-05-04	4.74	3.91669	5.44847
1999-05-11	5.33	3.91669	5.44847
1999-05-18	4.9	3.91669	5.44847
1999-05-25	3.94	3.91669	5.44847
1999-06-01	4.86	3.91669	5.44847
1999-06-08	4.54	3.91669	5.44847
1999-06-15	4.09	3.91669	5.44847
1999-06-22	4.34	3.91669	5.44847
1999-06-29	4.08	3.91669	5.44847
1999-07-06	4.18	3.91669	5.44847
1999-07-13	3.93	3.91669	5.44847
1999-07-20	4.88	3.91669	5.44847
1999-07-27	4.14	3.91669	5.44847
1999-08-03	4.19	3.91669	5.44847
1999-08-10	5.66	3.91669	5.44847
1999-08-17	4.72	3.91669	5.44847
1999-08-24	4.69	3.91669	5.44847
1999-08-31	5.45	3.91669	5.44847
1999-09-07	4.88	3.91669	5.44847
1999-09-14	4.89	3.91669	5.44847
1999-09-21	4.78	3.91669	5.44847
1999-09-28	4.32	3.91669	5.44847
1999-10-05	3.87	3.91669	5.44847
1999-10-12	3.3	3.91669	5.44847
1999-10-19	3.51	3.91669	5.44847
1999-10-26	3.49	3.91669	5.44847
1999-11-02	3.76	3.91669	5.44847
1999-11-09	3.28	3.91669	5.44847
1999-11-16	2.59	3.91669	5.44847
1999-11-23	1.76	3.91669	5.44847
1999-11-30	1.84	3.91669	5.44847
1999-12-07	2.1	3.91669	5.44847
1999-12-14	3.3	3.91669	5.44847
1999-12-21	1.63	3.91669	5.44847
1999-12-28	2.78	3.91669	5.44847
2000-01-04	1.83	4.13924	4.01647
2000-01-11	4.69	4.13924	4.01647
2000-01-18	4.26	4.13924	4.01647
2000-01-25	5.27	4.13924	4.01647
2000-02-01	5.28	4.13924	4.01647
2000-02-08	3.96	4.13924	4.01647
2000-02-15	4.28	4.13924	4.01647
2000-02-22	4	4.13924	4.01647
2000-02-29	3.84	4.13924	4.01647
2000-03-07	4.18	4.13924	4.01647
2000-03-14	3.58	4.13924	4.01647
2000-03-21	4.08	4.13924	4.01647
2000-03-28	4.51	4.13924	4.01647
2000-04-04	4.25	4.13924	4.01647
2000-04-11	4.44	4.13924	4.01647
2000-04-18	4.95	4.13924	4.01647
2000-04-25	3.97	4.13924	4.01647
2000-05-02	4	4.13924	4.01647
2000-05-09	4.35	4.13924	4.01647
2000-05-16	4	4.13924	4.01647
2000-05-23	4.09	4.13924	4.01647
2000-05-30	4.14	4.13924	4.01647
2000-06-06	4.53	4.13924	4.01647
2000-06-13	4.17	4.13924	4.01647
2000-06-20	3.47	4.13924	4.01647
2000-06-27	3.98	4.13924	4.01647
2000-07-04	4.19	4.13924	4.01647
2000-07-11	3.03	4.13924	4.01647
2000-07-18	3.75	4.13924	4.01647
2000-07-25	4.06	4.13924	4.01647
2000-08-01	3.3	4.13924	4.01647
2000-08-08	3.33	4.13924	4.01647
2000-08-15	3.59	4.13924	4.01647
2000-08-22	4.35	4.13924	4.01647
2000-08-29	3.66	4.13924	4.01647
2000-09-05	3.96	4.13924	4.01647
2000-09-12	3.84	4.13924	4.01647
2000-09-19	6.44	4.13924	4.01647
2000-09-26	4.26	4.13924	4.01647
2000-10-03	4.45	4.13924	4.01647
2000-10-10	4.41	4.13924	4.01647
2000-10-17	4.01	4.13924	4.01647
2000-10-24	4.08	4.13924	4.01647
2000-10-31	4.54	4.13924	4.01647
2000-11-07	3.85	4.13924	4.01647
2000-11-14	6.74	4.13924	4.01647
2000-11-21	4.67	4.13924	4.01647
2000-11-28	3.87	4.13924	4.01647
2000-12-05	3.79	4.13924	4.01647
2000-12-12	4.07	4.13924	4.01647
2000-12-19	3.89	4.13924	4.01647
2000-12-27	3.93	4.13924	4.01647
2001-01-02	3.84	3.94525	#N/A
2001-01-09	3.5	3.94525	#N/A
2001-01-16	4	3.94525	#N/A
2001-01-23	4.3	3.94525	#N/A
2001-01-30	3.58	3.94525	#N/A
2001-02-06	4.6	3.94525	#N/A
2001-02-13	3.77	3.94525	#N/A
2001-02-20	4.46	3.94525	#N/A
2001-02-27	4.69	3.94525	#N/A
2001-03-06	4.85	3.94525	#N/A
2001-03-13	3.86	3.94525	#N/A
2001-03-20	3.69	3.94525	#N/A
2001-03-27	3.42	3.94525	#N/A
2001-04-03	3.26	3.94525	#N/A
2001-04-10	3.69	3.94525	#N/A
2001-04-17	3.47	3.94525	#N/A
2001-04-24	3.8	3.94525	#N/A
2001-05-01	3.83	3.94525	#N/A
2001-05-08	3.525	3.94525	#N/A
2001-05-15	3.81	3.94525	#N/A
2001-05-22	3.24	3.94525	#N/A
2001-05-29	3.88	3.94525	#N/A
2001-06-05	3.71	3.94525	#N/A
2001-06-12	3.64	3.94525	#N/A
2001-06-19	3.8	3.94525	#N/A
2001-06-26	3.7	3.94525	#N/A
2001-07-03	3.6	3.94525	#N/A
2001-07-10	3.6	3.94525	#N/A
2001-07-17	3.5	3.94525	#N/A
2001-07-24	3.8	3.94525	#N/A
2001-07-31	3.6	3.94525	#N/A
2001-08-07	3.1	3.94525	#N/A
2001-08-14	3.5	3.94525	#N/A
2001-08-21	3.6	3.94525	#N/A
2001-08-28	3.79	3.94525	#N/A
2001-09-04	3.6	3.94525	#N/A
2001-09-11	3.6	3.94525	#N/A
2001-09-18	3.3	3.94525	#N/A
2001-09-25	3.84	3.94525	#N/A
2001-10-02	3.88	3.94525	#N/A
2001-10-09	4.2	3.94525	#N/A
2001-10-16	3.37	3.94525	#N/A
2001-10-23	4.34	3.94525	#N/A
2001-10-30	4.28	3.94525	#N/A
2001-11-06	4.38	3.94525	#N/A
2001-11-13	4.5	3.94525	#N/A
2001-11-20	4.58	3.94525	#N/A
2001-11-27	4.9	3.94525	#N/A
2001-12-04	3.93	3.94525	#N/A
2001-12-11	3.92	3.94525	#N/A
2001-12-18	4.65	3.94525	#N/A
2001-12-27	6.3	3.94525	#N/A
2002-01-02	4.52	4.46852	#N/A
2002-01-08	4.83	4.46852	#N/A
2002-01-15	4.91	4.46852	#N/A
2002-01-22	4.6	4.46852	#N/A
2002-01-29	5.36	4.46852	#N/A
2002-02-05	4.03	4.46852	#N/A
2002-02-12	4	4.46852	#N/A
2002-02-19	3.94	4.46852	#N/A
2002-02-26	3.46	4.46852	#N/A
2002-03-05	3.76	4.46852	#N/A
2002-03-12	4.25	4.46852	#N/A
2002-03-19	4.34	4.46852	#N/A
2002-03-26	3.88	4.46852	#N/A
2002-04-02	3.92	4.46852	#N/A
2002-04-09	4.93	4.46852	#N/A
2002-04-16	4.62	4.46852	#N/A
2002-04-23	1.4	4.46852	#N/A
2002-05-01	4.18	4.46852	#N/A
2002-05-07	3.58	4.46852	#N/A
2002-05-14	4.1	4.46852	#N/A
2002-05-21	4.1	4.46852	#N/A
2002-05-28	3.76	4.46852	#N/A
2002-06-04	3.64	4.46852	#N/A
2002-06-11	5.49	4.46852	#N/A
2002-06-18	6.21	4.46852	#N/A
2002-06-25	5.21	4.46852	#N/A
2002-07-02	4.14	4.46852	#N/A
2002-07-09	4.61	4.46852	#N/A
2002-07-16	3.49	4.46852	#N/A
2002-07-23	4.86	4.46852	#N/A
2002-07-30	4.38	4.46852	#N/A
2002-08-06	3.87	4.46852	#N/A
2002-08-13	4.3	4.46852	#N/A
2002-08-20	4.79	4.46852	#N/A
2002-08-27	4.16	4.46852	#N/A
2002-09-03	4.69	4.46852	#N/A
2002-09-10	4.15	4.46852	#N/A
2002-09-17	4.41	4.46852	#N/A
2002-09-24	5.06	4.46852	#N/A
2002-10-01	4.47	4.46852	#N/A
2002-10-08	4.7	4.46852	#N/A
2002-10-15	4.52	4.46852	#N/A
2002-10-22	3.88	4.46852	#N/A
2002-10-29	3.63	4.46852	#N/A
2002-11-05	5.21	4.46852	#N/A
2002-11-12	6.19	4.46852	#N/A
2002-11-19	3.75	4.46852	#N/A
2002-11-26	3.72	4.46852	#N/A
2002-12-03	4.24	4.46852	#N/A
2002-12-10	4.16	4.46852	#N/A
2002-12-17	3.95	4.46852	#N/A
2002-12-23	5.03	4.46852	#N/A
2002-12-30	5.28	4.46852	#N/A
2003-01-07	4.28	4.34933	#N/A
2003-01-14	4.35	4.34933	#N/A
2003-01-21	3.96	4.34933	#N/A
2003-01-28	3.97	4.34933	#N/A
2003-02-04	4.53	4.34933	#N/A
2003-02-11	4.46	4.34933	#N/A
2003-02-18	4.61	4.34933	#N/A
2003-02-25	4.92	4.34933	#N/A
2003-03-04	4.17	4.34933	#N/A
2003-03-11	3.69	4.34933	#N/A
2003-03-18	4	4.34933	#N/A
2003-03-25	4.26	4.34933	#N/A
2003-04-01	3.98	4.34933	#N/A
2003-04-08	4.43	4.34933	#N/A
2003-04-15	4.15	4.34933	#N/A
2003-04-22	4.24	4.34933	#N/A
2003-04-28	4.42	4.34933	#N/A
2003-05-06	4.54	4.34933	#N/A
2003-05-13	4.15	4.34933	#N/A
2003-05-20	4.19	4.34933	#N/A
2003-05-27	4.68	4.34933	#N/A
2003-06-03	4.62	4.34933	#N/A
2003-06-10	3.42	4.34933	#N/A
2003-06-17	3.61	4.34933	#N/A
2003-06-24	3.64	4.34933	#N/A
2003-07-01	4.03	4.34933	#N/A
2003-07-08	3.95	4.34933	#N/A
2003-07-15	4.11	4.34933	#N/A
2003-07-22	4.07	4.34933	#N/A
2003-07-29	4.07	4.34933	#N/A
2003-08-05	3.35	4.34933	#N/A
2003-08-12	3.24	4.34933	#N/A
2003-08-19	3.62	4.34933	#N/A
2003-08-26	3.8	4.34933	#N/A
2003-09-02	4.4	4.34933	#N/A
2003-09-09	3.99	4.34933	#N/A
2003-09-16	5.41	4.34933	#N/A
2003-09-23	4.43	4.34933	#N/A
2003-09-30	4.58	4.34933	#N/A
2003-10-07	5.05	4.34933	#N/A
2003-10-14	4.41	4.34933	#N/A
2003-10-21	4.13	4.34933	#N/A
2003-10-28	5.58	4.34933	#N/A
2003-11-04	4.88	4.34933	#N/A
2003-11-11	4.39	4.34933	#N/A
2003-11-18	5.34	4.34933	#N/A
2003-11-25	4.9	4.34933	#N/A
2003-12-02	5.55	4.34933	#N/A
2003-12-09	4.85	4.34933	#N/A
2003-12-16	4.62	4.34933	#N/A
2003-12-23	4.56	4.34933	#N/A
2003-12-30	5.59	4.34933	#N/A
2004-01-06	#N/A	#N/A	#N/A
2004-01-13	#N/A	#N/A	#N/A
2004-01-20	#N/A	#N/A	#N/A
2004-01-27	#N/A	#N/A	#N/A
2004-02-03	#N/A	#N/A	#N/A
2004-02-10	#N/A	#N/A	#N/A
2004-02-17	#N/A	#N/A	#N/A
2004-02-24	#N/A	#N/A	#N/A
2004-03-02	#N/A	#N/A	#N/A
2004-03-09	#N/A	#N/A	#N/A
2004-03-16	#N/A	#N/A	#N/A
2004-03-23	#N/A	#N/A	#N/A
2004-03-30	#N/A	#N/A	#N/A
2004-04-06	#N/A	#N/A	#N/A
2004-04-13	#N/A	#N/A	#N/A
2004-04-20	#N/A	#N/A	#N/A
2004-04-27	#N/A	#N/A	#N/A
2004-05-06	#N/A	#N/A	#N/A
2004-05-11	#N/A	#N/A	#N/A
2004-05-18	#N/A	#N/A	#N/A
2004-05-25	#N/A	#N/A	#N/A
2004-06-01	#N/A	#N/A	#N/A
2004-06-08	#N/A	#N/A	#N/A
2004-06-15	#N/A	#N/A	#N/A
2004-06-22	#N/A	#N/A	#N/A
2004-06-29	#N/A	#N/A	#N/A
2004-07-06	#N/A	#N/A	#N/A
2004-07-13	#N/A	#N/A	#N/A
2004-07-20	#N/A	#N/A	#N/A
2004-07-27	#N/A	#N/A	#N/A
2004-08-03	#N/A	#N/A	#N/A
2004-08-10	#N/A	#N/A	#N/A
2004-08-17	#N/A	#N/A	#N/A
2004-08-24	#N/A	#N/A	#N/A
2004-08-31	#N/A	#N/A	#N/A
2004-09-07	#N/A	#N/A	#N/A
2004-09-14	#N/A	#N/A	#N/A
2004-09-21	#N/A	#N/A	#N/A
2004-09-28	#N/A	#N/A	#N/A
2004-10-05	#N/A	#N/A	#N/A
2004-10-12	#N/A	#N/A	#N/A
2004-10-19	#N/A	#N/A	#N/A
2004-10-26	#N/A	#N/A	#N/A
2004-11-02	#N/A	#N/A	#N/A
2004-11-10	#N/A	#N/A	#N/A
2004-11-16	#N/A	#N/A	#N/A
2004-11-23	#N/A	#N/A	#N/A
2004-11-30	#N/A	#N/A	#N/A
2004-12-07	#N/A	#N/A	#N/A
2004-12-14	#N/A	#N/A	#N/A
2004-12-21	#N/A	#N/A	#N/A
2004-12-28	#N/A	#N/A	#N/A
2005-01-04	4.6	4.51005	#N/A
2005-01-11	4.6	4.51005	#N/A
2005-01-18	4.7	4.51005	#N/A
2005-01-25	5.4	4.51005	#N/A
2005-02-01	4.9	4.51005	#N/A
2005-02-08	4.8	4.51005	#N/A
2005-02-15	5.6	4.51005	#N/A
2005-02-22	4.5	4.51005	#N/A
2005-03-01	4.2	4.51005	#N/A
2005-03-08	4.8	4.51005	#N/A
2005-03-15	5	4.51005	#N/A
2005-03-22	4	4.51005	#N/A
2005-03-29	4.1	4.51005	#N/A
2005-04-05	4.1	4.51005	#N/A
2005-04-12	4.2	4.51005	#N/A
2005-04-19	3.5	4.51005	#N/A
2005-04-26	4.18	4.51005	#N/A
2005-05-03	3.41	4.51005	#N/A
2005-05-10	3.31	4.51005	#N/A
2005-05-17	3.82	4.51005	#N/A
2005-05-24	3.51	4.51005	#N/A
2005-05-31	4.37	4.51005	#N/A
2005-06-07	3.96	4.51005	#N/A
2005-06-14	1.91	4.51005	#N/A
2005-06-21	4.07	4.51005	#N/A
2005-06-28	2.98	4.51005	#N/A
2005-07-05	3.89	4.51005	#N/A
2005-07-12	3.52	4.51005	#N/A
2005-07-19	3.83	4.51005	#N/A
2005-07-26	3.95	4.51005	#N/A
2005-08-02	3.52	4.51005	#N/A
2005-08-09	3.86	4.51005	#N/A
2005-08-16	3.29	4.51005	#N/A
2005-08-23	3.72	4.51005	#N/A
2005-08-30	3.67	4.51005	#N/A
2005-09-06	3.61	4.51005	#N/A
2005-09-13	4.23	4.51005	#N/A
2005-09-20	3.64	4.51005	#N/A
2005-09-27	4.44	4.51005	#N/A
2005-10-04	3.24	4.51005	#N/A
2005-10-11	3.67	4.51005	#N/A
2005-10-18	3.72	4.51005	#N/A
2005-10-25	3.83	4.51005	#N/A
2005-11-01	4.37	4.51005	#N/A
2005-11-08	4.21	4.51005	#N/A
2005-11-15	4.14	4.51005	#N/A
2005-11-22	4.19	4.51005	#N/A
2005-11-29	4.13	4.51005	#N/A
2005-12-06	3.77	4.51005	#N/A
2005-12-13	4.8	4.51005	#N/A
2005-12-20	4.89	4.51005	#N/A
2005-12-27	5.31	4.51005	#N/A
2006-01-03	5.2	4.72548	#N/A
2006-01-10	4.7	4.72548	#N/A
2006-01-17	4.94	4.72548	#N/A
2006-01-24	4.27	4.72548	#N/A
2006-01-31	4.75	4.72548	#N/A
2006-02-07	5.07	4.72548	#N/A
2006-02-14	5.16	4.72548	#N/A
2006-02-21	5.96	4.72548	#N/A
2006-02-28	5.02	4.72548	#N/A
2006-03-07	4.86	4.72548	#N/A
2006-03-14	5.89	4.72548	#N/A
2006-03-21	6.16	4.72548	#N/A
2006-03-28	4.63	4.72548	#N/A
2006-04-04	4.36	4.72548	#N/A
2006-04-11	4.31	4.72548	#N/A
2006-04-18	4.84	4.72548	#N/A
2006-04-25	4.38	4.72548	#N/A
2006-05-02	4.23	4.72548	#N/A
2006-05-09	3.72	4.72548	#N/A
2006-05-16	4.14	4.72548	#N/A
2006-05-23	3.19	4.72548	#N/A
2006-05-30	4.26	4.72548	#N/A
2006-06-06	4.32	4.72548	#N/A
2006-06-13	#N/A	4.72548	#N/A
2006-06-20	3.63	4.72548	#N/A
2006-06-27	4.8	4.72548	#N/A
2006-07-04	3.98	4.72548	#N/A
2006-07-11	4.06	4.72548	#N/A
2006-07-18	4.11	4.72548	#N/A
2006-07-25	3.09	4.72548	#N/A
2006-08-01	4.27	4.72548	#N/A
2006-08-08	3.83	4.72548	#N/A
2006-08-15	4.37	4.72548	#N/A
2006-08-22	4.41	4.72548	#N/A
2006-08-29	4.29	4.72548	#N/A
2006-09-05	5	4.72548	#N/A
2006-09-12	4.04	4.72548	#N/A
2006-09-19	4.66	4.72548	#N/A
2006-09-26	4.91	4.72548	#N/A
2006-10-03	4.72	4.72548	#N/A
2006-10-10	3.94	4.72548	#N/A
2006-10-17	3.93	4.72548	#N/A
2006-10-24	4.67	4.72548	#N/A
2006-10-31	4.42	4.72548	#N/A
2006-11-07	4.8	4.72548	#N/A
2006-11-14	4.86	4.72548	#N/A
2006-11-21	4.82	4.72548	#N/A
2006-11-28	4.5	4.72548	#N/A
2006-12-05	4.58	4.72548	#N/A
2006-12-12	4.91	4.72548	#N/A
2006-12-19	5.8	4.72548	#N/A
2006-12-27	5.77	4.72548	#N/A
2007-01-02	4.62	4.03998	#N/A
2007-01-09	4.41	4.03998	#N/A
2007-01-16	3.96	4.03998	#N/A
2007-01-23	4.56	4.03998	#N/A
2007-01-30	4.43	4.03998	#N/A
2007-02-06	4.56	4.03998	#N/A
2007-02-13	4.56	4.03998	#N/A
2007-02-20	3.73	4.03998	#N/A
2007-02-27	4.23	4.03998	#N/A
2007-03-06	3.54	4.03998	#N/A
2007-03-13	3.32	4.03998	#N/A
2007-03-20	3.75	4.03998	#N/A
2007-03-27	3.58	4.03998	#N/A
2007-04-03	3.74	4.03998	#N/A
2007-04-10	4.42	4.03998	#N/A
2007-04-17	4.59	4.03998	#N/A
2007-04-24	3.75	4.03998	#N/A
2007-05-01	4.54	4.03998	#N/A
2007-05-08	4.08	4.03998	#N/A
2007-05-15	3.88	4.03998	#N/A
2007-05-22	4.83	4.03998	#N/A
2007-05-29	3	4.03998	#N/A
2007-06-05	3.62	4.03998	#N/A
2007-06-12	3.26	4.03998	#N/A
2007-06-19	3.34	4.03998	#N/A
2007-06-26	3.75	4.03998	#N/A
2007-07-03	2.98	4.03998	#N/A
2007-07-10	3.41	4.03998	#N/A
2007-07-17	3.02	4.03998	#N/A
2007-07-24	3.74	4.03998	#N/A
2007-07-31	3.05	4.03998	#N/A
2007-08-07	4.69	4.03998	#N/A
2007-08-14	3.77	4.03998	#N/A
2007-08-21	2.78	4.03998	#N/A
2007-08-28	3.58	4.03998	#N/A
2007-09-04	3.44	4.03998	#N/A
2007-09-11	4.04	4.03998	#N/A
2007-09-18	4.02	4.03998	#N/A
2007-09-25	3.77	4.03998	#N/A
2007-10-02	4.21	4.03998	#N/A
2007-10-09	3.15	4.03998	#N/A
2007-10-16	4.35	4.03998	#N/A
2007-10-23	4.57	4.03998	#N/A
2007-10-30	4.98	4.03998	#N/A
2007-11-06	3.99	4.03998	#N/A
2007-11-13	3.83	4.03998	#N/A
2007-11-20	4.65	4.03998	#N/A
2007-11-27	4.89	4.03998	#N/A
2007-12-04	4.93	4.03998	#N/A
2007-12-11	3.68	4.03998	#N/A
2007-12-18	3.5	4.03998	#N/A
2007-12-27	4.75	4.03998	#N/A
2008-01-02	4.32	3.85681	#N/A
2008-01-08	4.83	3.85681	#N/A
2008-01-15	3.92	3.85681	#N/A
2008-01-22	3.56	3.85681	#N/A
2008-01-29	3.88	3.85681	#N/A
2008-02-05	3.89	3.85681	#N/A
2008-02-12	3.76	3.85681	#N/A
2008-02-19	4.05	3.85681	#N/A
2008-02-26	4.48	3.85681	#N/A
2008-03-04	3.95	3.85681	#N/A
2008-03-11	4.09	3.85681	#N/A
2008-03-18	3.62	3.85681	#N/A
2008-03-25	3.91	3.85681	#N/A
2008-04-01	3.59	3.85681	#N/A
2008-04-08	3.49	3.85681	#N/A
2008-04-15	3.82	3.85681	#N/A
2008-04-22	3.42	3.85681	#N/A
2008-04-29	3.6	3.85681	#N/A
2008-05-06	4.14	3.85681	#N/A
2008-05-13	3.48	3.85681	#N/A
2008-05-20	3.81	3.85681	#N/A
2008-05-27	3.74	3.85681	#N/A
2008-06-03	4.18	3.85681	#N/A
2008-06-10	3.79	3.85681	#N/A
2008-06-17	4.24	3.85681	#N/A
2008-06-24	3.6	3.85681	#N/A
2008-07-01	3.57	3.85681	#N/A
2008-07-08	4.21	3.85681	#N/A
2008-07-15	3.36	3.85681	#N/A
2008-07-22	3.9	3.85681	#N/A
2008-07-29	3.54	3.85681	#N/A
2008-08-05	3.76	3.85681	#N/A
2008-08-12	4.26	3.85681	#N/A
2008-08-19	4.06	3.85681	#N/A
2008-08-26	3.72	3.85681	#N/A
2008-09-02	4.22	3.85681	#N/A
2008-09-09	3.5	3.85681	#N/A
2008-09-16	3.75	3.85681	#N/A
2008-09-23	3.87	3.85681	#N/A
2008-09-30	3.79	3.85681	#N/A
2008-10-07	4.52	3.85681	#N/A
2008-10-14	3.28	3.85681	#N/A
2008-10-21	3.38	3.85681	#N/A
2008-10-28	4.17	3.85681	#N/A
2008-11-04	3.71	3.85681	#N/A
2008-11-11	2.84	3.85681	#N/A
2008-11-18	3.68	3.85681	#N/A
2008-11-25	3.87	3.85681	#N/A
2008-12-02	4.43	3.85681	#N/A
2008-12-09	3.91	3.85681	#N/A
2008-12-16	3.78	3.85681	#N/A
2008-12-23	3.93	3.85681	#N/A
2008-12-30	3.98	3.85681	#N/A
2009-01-06	4.51	3.92776	#N/A
2009-01-13	4.89	3.92776	#N/A
2009-01-20	4.62	3.92776	#N/A
2009-01-27	4.13	3.92776	#N/A
2009-02-03	4.57	3.92776	#N/A
2009-02-10	4.65	3.92776	#N/A
2009-02-17	4.47	3.92776	#N/A
2009-02-24	3.99	3.92776	#N/A
2009-03-03	4.15	3.92776	#N/A
2009-03-10	3.85	3.92776	#N/A
2009-03-17	3.89	3.92776	#N/A
2009-03-24	4.06	3.92776	#N/A
2009-03-31	3.96	3.92776	#N/A
2009-04-07	3.68	3.92776	#N/A
2009-04-14	3.67	3.92776	#N/A
2009-04-21	3.69	3.92776	#N/A
2009-04-28	3.37	3.92776	#N/A
2009-05-06	3.44	3.92776	#N/A
2009-05-12	3.64	3.92776	#N/A
2009-05-19	3.61	3.92776	#N/A
2009-05-26	3.88	3.92776	#N/A
2009-06-02	3.39	3.92776	#N/A
2009-06-09	3.32	3.92776	#N/A
2009-06-16	3.37	3.92776	#N/A
2009-06-23	3.32	3.92776	#N/A
2009-06-30	3.22	3.92776	#N/A
2009-07-07	3.28	3.92776	#N/A
2009-07-14	3.31	3.92776	#N/A
2009-07-21	3.18	3.92776	#N/A
2009-07-28	2.86	3.92776	#N/A
2009-08-04	3.36	3.92776	#N/A
2009-08-11	3.41	3.92776	#N/A
2009-08-18	3	3.92776	#N/A
2009-08-25	3.18	3.92776	#N/A
2009-09-01	3.41	3.92776	#N/A
2009-09-08	3.19	3.92776	#N/A
2009-09-15	3.23	3.92776	#N/A
2009-09-22	3.58	3.92776	#N/A
2009-09-29	3.51	3.92776	#N/A
2009-10-06	3.46	3.92776	#N/A
2009-10-13	3.81	3.92776	#N/A
2009-10-20	3.68	3.92776	#N/A
2009-10-27	3.59	3.92776	#N/A
2009-11-03	3.38	3.92776	#N/A
2009-11-10	2.72	3.92776	#N/A
2009-11-17	2.92	3.92776	#N/A
2009-11-24	3.07	3.92776	#N/A
2009-12-01	3.65	3.92776	#N/A
2009-12-08	3.99	3.92776	#N/A
2009-12-15	3.8	3.92776	#N/A
2009-12-22	4.31	3.92776	#N/A
2009-12-29	3.94	3.92776	#N/A
2010-01-05	3.78	3.98419	#N/A
2010-01-12	4.49	3.98419	#N/A
2010-01-19	4.23	3.98419	#N/A
2010-01-26	4.12	3.98419	#N/A
2010-02-02	6.1	3.98419	#N/A
2010-02-09	3.96	3.98419	#N/A
2010-02-16	3.9	3.98419	#N/A
2010-02-23	4.62	3.98419	#N/A
2010-03-02	3.81	3.98419	#N/A
2010-03-09	3.6	3.98419	#N/A
2010-03-16	3.93	3.98419	#N/A
2010-03-23	3.76	3.98419	#N/A
2010-03-30	3.86	3.98419	#N/A
2010-04-06	3.67	3.98419	#N/A
2010-04-13	4.02	3.98419	#N/A
2010-04-20	4.31	3.98419	#N/A
2010-04-27	3.5	3.98419	#N/A
2010-05-03	2.93	3.98419	#N/A
2010-05-11	3.45	3.98419	#N/A
2010-05-18	3.47	3.98419	#N/A
2010-05-25	3.72	3.98419	#N/A
2010-06-01	3.72	3.98419	#N/A
2010-06-08	3.64	3.98419	#N/A
2010-06-15	3.51	3.98419	#N/A
2010-06-22	3.42	3.98419	#N/A
2010-06-29	3.02	3.98419	#N/A
2010-07-06	3.44	3.98419	#N/A
2010-07-13	2.97	3.98419	#N/A
2010-07-20	2.97	3.98419	#N/A
2010-07-27	2.76	3.98419	#N/A
2010-08-03	3.84	3.98419	#N/A
2010-08-10	2.83	3.98419	#N/A
2010-08-17	3.03	3.98419	#N/A
2010-08-24	3.11	3.98419	#N/A
2010-08-31	3.24	3.98419	#N/A
2010-09-07	3.1	3.98419	#N/A
2010-09-14	3.35	3.98419	#N/A
2010-09-21	3.21	3.98419	#N/A
2010-09-28	3.13	3.98419	#N/A
2010-10-05	3.01	3.98419	#N/A
2010-10-12	3.53	3.98419	#N/A
2010-10-19	3.88	3.98419	#N/A
2010-10-26	3.37	3.98419	#N/A
2010-11-02	3.57	3.98419	#N/A
2010-11-09	3.51	3.98419	#N/A
2010-11-16	4.52	3.98419	#N/A
2010-11-23	3.97	3.98419	#N/A
2010-11-30	4.02	3.98419	#N/A
2010-12-07	4.29	3.98419	#N/A
2010-12-14	4.92	3.98419	#N/A
2010-12-21	4.42	3.98419	#N/A
2010-12-28	4.04	3.98419	#N/A
2011-01-04	4.34	4.22871	#N/A
2011-01-11	4.2	4.22871	#N/A
2011-01-18	4.22	4.22871	#N/A
2011-01-25	4.53	4.22871	#N/A
2011-02-01	4.56	4.22871	#N/A
2011-02-08	4.37	4.22871	#N/A
2011-02-15	4.63	4.22871	#N/A
2011-02-22	4.28	4.22871	#N/A
2011-03-01	4.41	4.22871	#N/A
2011-03-08	4.45	4.22871	#N/A
2011-03-15	4.39	4.22871	#N/A
2011-03-22	3.98	4.22871	#N/A
2011-03-29	4.2	4.22871	#N/A
2011-04-05	4.2	4.22871	#N/A
2011-04-12	4.02	4.22871	#N/A
2011-04-19	4.05	4.22871	#N/A
2011-04-26	3.32	4.22871	#N/A
2011-05-03	3.61	4.22871	#N/A
2011-05-10	3.22	4.22871	#N/A
2011-05-17	3	4.22871	#N/A
2011-05-24	3.13	4.22871	#N/A
2011-05-31	3.29	4.22871	#N/A
2011-06-07	3.24	4.22871	#N/A
2011-06-14	3.24	4.22871	#N/A
2011-06-21	3	4.22871	#N/A
2011-06-28	2.99	4.22871	#N/A
2011-07-05	3.05	4.22871	#N/A
2011-07-12	3.32	4.22871	#N/A
2011-07-19	3.01	4.22871	#N/A
2011-07-26	3.02	4.22871	#N/A
2011-08-02	3.18	4.22871	#N/A
2011-08-09	3.14	4.22871	#N/A
2011-08-16	3.43	4.22871	#N/A
2011-08-23	3.75	4.22871	#N/A
2011-08-30	3.56	4.22871	#N/A
2011-09-06	3.19	4.22871	#N/A
2011-09-13	3.32	4.22871	#N/A
2011-09-20	3.45	4.22871	#N/A
2011-09-27	3.65	4.22871	#N/A
2011-10-04	3.61	4.22871	#N/A
2011-10-11	3.43	4.22871	#N/A
2011-10-18	3.42	4.22871	#N/A
2011-10-25	3.19	4.22871	#N/A
2011-11-01	3.77	4.22871	#N/A
2011-11-08	3.87	4.22871	#N/A
2011-11-15	4.03	4.22871	#N/A
2011-11-22	3.67	4.22871	#N/A
2011-11-29	3.85	4.22871	#N/A
2011-12-06	3.44	4.22871	#N/A
2011-12-13	4.58	4.22871	#N/A
2011-12-20	4.62	4.22871	#N/A
2011-12-27	3.42	4.22871	#N/A
2012-01-03	4.23	#N/A	#N/A
2012-01-10	3.72	#N/A	#N/A
2012-01-17	3.87	#N/A	#N/A
2012-01-24	4.16	#N/A	#N/A
2012-01-31	4.11	#N/A	#N/A
2012-02-07	4.39	#N/A	#N/A
2012-02-14	5.15	#N/A	#N/A
2012-02-21	5.07	#N/A	#N/A
2012-02-28	4.33	#N/A	#N/A
2012-03-06	4.06	#N/A	#N/A
2012-03-13	3.84	#N/A	#N/A
2012-03-20	4.03	#N/A	#N/A
2012-03-27	3.45	#N/A	#N/A
2012-04-03	4.2	#N/A	#N/A
2012-04-10	3.82	#N/A	#N/A
2012-04-17	3.41	#N/A	#N/A
2012-04-24	3.12	#N/A	#N/A
2012-05-01	3.21	#N/A	#N/A
2012-05-08	3.42	#N/A	#N/A
2012-05-15	3.5	#N/A	#N/A
2012-05-22	3.58	#N/A	#N/A
2012-05-29	3.15	#N/A	#N/A
2012-06-05	3.03	#N/A	#N/A
2012-06-12	3.41	#N/A	#N/A
2012-06-19	3.37	#N/A	#N/A
2012-06-26	2.67	#N/A	#N/A
2012-07-03	3.88	#N/A	#N/A
2012-07-10	3.52	#N/A	#N/A
2012-07-17	3.19	#N/A	#N/A
2012-07-24	2.9	#N/A	#N/A
2012-07-31	3.38	#N/A	#N/A
2012-08-07	3.09	#N/A	#N/A
2012-08-14	2.83	#N/A	#N/A
2012-08-21	3.2	#N/A	#N/A
2012-08-28	3.35	#N/A	#N/A
2012-09-04	2.73	#N/A	#N/A
2012-09-11	3.4	#N/A	#N/A
2012-09-18	3.5	#N/A	#N/A
2012-09-25	3.66	#N/A	#N/A
2012-10-02	3.47	#N/A	#N/A
2012-10-09	3.61	#N/A	#N/A
2012-10-16	3.2	#N/A	#N/A
2012-10-23	3.01	#N/A	#N/A
2012-10-30	3.68	#N/A	#N/A
2012-11-06	3.84	#N/A	#N/A
2012-11-13	3.29	#N/A	#N/A
2012-11-20	3.97	#N/A	#N/A
2012-11-27	3.92	#N/A	#N/A
2012-12-04	4.4	#N/A	#N/A
2012-12-11	4.35	#N/A	#N/A
2012-12-18	4.4	#N/A	#N/A
2012-12-27	3.97	#N/A	#N/A

## Sheet: figure 6HI
year	Simulation	Observation	Residue
1970	4.2124	4.57975	0.367349
1971	6.02369	4.97576	-1.04793
1972	5.45054	4.3347	-1.11583
1973	6.34476	5.19796	-1.1468
1974	4.86194	4.56304	-0.298899
1975	5.516	4.20115	-1.31486
1976	7.62231	5.20144	-2.42087
1977	5.60518	4.71502	-0.89016
1978	5.23756	4.12302	-1.11455
1979	4.54494	4.5165	-0.0284346
1980	4.37028	3.96034	-0.409942
1981	3.88212	4.12711	0.244989
1982	4.97155	3.9894	-0.982147
1983	4.36531	3.90942	-0.455889
1984	4.23158	4.52601	0.294431
1985	6.15165	4.63068	-1.52097
1986	5.13268	5.14095	0.00826299
1987	4.59773	4.48726	-0.110474
1988	4.68479	4.11727	-0.567516
1989	6.26868	4.38965	-1.87904
1990	6.92717	4.23367	-2.6935
1991	6.5799	4.32811	-2.25179
1992	6.47204	4.68963	-1.78242
1993	6.42594	5.4302	-0.995736
1994	4.91374	4.47457	-0.439168
1995	4.59308	4.74693	0.153851
1996	9.27681	5.27405	-4.00275
1997	6.57191	4.71995	-1.85196
1998	4.63733	4.89199	0.254666
1999	5.44847	3.91669	-1.53178
2000	4.01647	4.13924	0.122774

## Sheet: figure 7A
sample_dt	Observation	Year observation	Simulated
1974-10-11	0.08	0.0851209	0.0938357
1974-11-07	0.11	0.0851209	0.0938357
1975-01-09	0.13	0.168682	0.101751
1975-02-14	0.27	0.168682	0.101751
1975-03-11	0.05	0.168682	0.101751
1975-04-04	0.12	0.168682	0.101751
1975-05-06	0.09	0.168682	0.101751
1975-07-16	0.3	0.168682	0.101751
1975-07-24	0.15	0.168682	0.101751
1975-08-13	0.17	0.168682	0.101751
1975-09-09	0.12	0.168682	0.101751
1975-10-02	0.23	0.168682	0.101751
1975-11-17	0.44	0.168682	0.101751
1975-12-18	0.17	0.168682	0.101751
1976-01-22	0.23	0.200447	0.127266
1976-02-24	0.24	0.200447	0.127266
1976-03-25	0.2	0.200447	0.127266
1976-04-05	0.29	0.200447	0.127266
1976-04-13	0.21	0.200447	0.127266
1976-05-27	0.2	0.200447	0.127266
1976-06-02	0.2	0.200447	0.127266
1976-07-15	0.24	0.200447	0.127266
1976-08-14	0.11	0.200447	0.127266
1976-10-27	0.11	0.200447	0.127266
1976-11-03	0.31	0.200447	0.127266
1976-12-01	0.09	0.200447	0.127266
1977-01-10	0.22	0.278612	0.145025
1977-02-07	0.11	0.278612	0.145025
1977-03-03	0.35	0.278612	0.145025
1977-04-04	0.18	0.278612	0.145025
1977-05-02	0.26	0.278612	0.145025
1977-06-01	0.15	0.278612	0.145025
1977-07-13	0.31	0.278612	0.145025
1977-08-08	0.16	0.278612	0.145025
1977-09-02	0.8	0.278612	0.145025
1977-10-18	0.27	0.278612	0.145025
1977-11-07	0.3	0.278612	0.145025
1977-12-08	0.25	0.278612	0.145025
1978-01-13	0.17	0.241011	0.132163
1978-02-13	0.34	0.241011	0.132163
1978-03-06	0.25	0.241011	0.132163
1978-04-25	0.28	0.241011	0.132163
1978-05-08	0.29	0.241011	0.132163
1978-06-05	0.05	0.241011	0.132163
1978-07-12	0.19	0.241011	0.132163
1978-08-15	0.34	0.241011	0.132163
1978-09-14	0.16	0.241011	0.132163
1978-10-23	0.2	0.241011	0.132163
1978-11-13	0.17	0.241011	0.132163
1978-12-12	0.4	0.241011	0.132163
1979-01-08	0.31	0.192317	0.105387
1979-02-08	0.21	0.192317	0.105387
1979-03-06	0.1	0.192317	0.105387
1979-04-02	0.16	0.192317	0.105387
1979-05-07	0.14	0.192317	0.105387
1979-06-11	0.16	0.192317	0.105387
1979-07-20	0.26	0.192317	0.105387
1979-08-06	0.24	0.192317	0.105387
1979-09-07	0.25	0.192317	0.105387
1979-10-01	0.32	0.192317	0.105387
1979-11-02	0.18	0.192317	0.105387
1979-12-19	0.22	0.192317	0.105387
1980-01-07	0.23	0.226194	0.110615
1980-02-04	0.16	0.226194	0.110615
1980-03-11	0.17	0.226194	0.110615
1980-04-10	0.21	0.226194	0.110615
1980-05-09	0.21	0.226194	0.110615
1980-06-10	0.22	0.226194	0.110615
1980-07-07	0.35	0.226194	0.110615
1980-08-04	0.22	0.226194	0.110615
1980-10-17	0.31	0.226194	0.110615
1980-11-13	0.24	0.226194	0.110615
1980-12-01	0.28	0.226194	0.110615
1981-01-12	0.21	0.325086	0.14208
1981-02-03	0.28	0.325086	0.14208
1981-03-13	0.14	0.325086	0.14208
1981-05-04	0.31	0.325086	0.14208
1981-06-01	0.6	0.325086	0.14208
1981-07-08	0.42	0.325086	0.14208
1981-08-06	0.43	0.325086	0.14208
1981-09-03	0.29	0.325086	0.14208
1981-10-09	0.23	0.325086	0.14208
1981-12-07	0.1	0.325086	0.14208
1982-02-17	0.13	0.186922	0.12265
1982-04-09	0.14	0.186922	0.12265
1982-06-10	0.29	0.186922	0.12265
1982-08-05	0.2	0.186922	0.12265
1982-10-07	0.13	0.186922	0.12265
1982-12-11	0.23	0.186922	0.12265
1983-01-25	0.22	0.183968	0.100536
1983-04-26	0.16	0.183968	0.100536
1983-06-22	0.11	0.183968	0.100536
1983-08-15	0.34	0.183968	0.100536
1983-10-03	0.14	0.183968	0.100536
1983-11-14	0.14	0.183968	0.100536
1983-12-06	0.29	0.183968	0.100536
1984-01-09	0.2	0.139125	0.107895
1984-02-14	0.09	0.139125	0.107895
1984-03-07	0.25	0.139125	0.107895
1984-04-16	0.11	0.139125	0.107895
1984-04-30	0.1	0.139125	0.107895
1984-06-26	0.15	0.139125	0.107895
1984-07-19	0.13	0.139125	0.107895
1984-08-21	0.19	0.139125	0.107895
1984-09-04	0.09	0.139125	0.107895
1984-10-15	0.11	0.139125	0.107895
1984-11-05	0.05	0.139125	0.107895
1984-12-03	0.16	0.139125	0.107895
1985-04-11	0.13	0.153049	0.108098
1985-06-06	0.08	0.153049	0.108098
1985-08-13	0.11	0.153049	0.108098
1985-10-01	0.16	0.153049	0.108098
1985-11-18	0.35	0.153049	0.108098
1985-12-03	0.22	0.153049	0.108098
1986-01-28	0.16	0.245759	0.116166
1986-02-18	0.12	0.245759	0.116166
1986-03-17	0.23	0.245759	0.116166
1986-04-15	0.21	0.245759	0.116166
1986-05-06	0.16	0.245759	0.116166
1986-06-16	0.29	0.245759	0.116166
1986-07-21	0.4	0.245759	0.116166
1986-08-12	0.29	0.245759	0.116166
1986-09-02	0.31	0.245759	0.116166
1987-10-20	0.08	0.0957098	0.113469
1987-12-02	0.14	0.0957098	0.113469
1988-01-05	0.52	0.265044	0.114583
1988-02-22	0.18	0.265044	0.114583
1988-03-15	0.37	0.265044	0.114583
1988-04-05	0.18	0.265044	0.114583
1988-05-10	0.24	0.265044	0.114583
1988-06-09	0.07	0.265044	0.114583
1988-07-05	0.11	0.265044	0.114583
1988-08-02	0.07	0.265044	0.114583
1988-10-12	0.2	0.265044	0.114583
1988-11-14	0.2	0.265044	0.114583
1988-12-22	0.14	0.265044	0.114583
1989-01-17	0.44	0.223492	0.0983327
1989-02-15	0.24	0.223492	0.0983327
1989-03-14	0.18	0.223492	0.0983327
1989-03-30	0.09	0.223492	0.0983327
1989-05-19	0.31	0.223492	0.0983327
1989-06-26	0.1	0.223492	0.0983327
1989-07-11	0.23	0.223492	0.0983327
1989-08-08	0.19	0.223492	0.0983327
1989-09-11	0.2	0.223492	0.0983327
1989-10-06	0.14	0.223492	0.0983327
1989-12-01	0.28	0.223492	0.0983327
1990-01-08	0.27	0.140931	0.0960036
1990-02-20	0.11	0.140931	0.0960036
1990-03-05	0.16	0.140931	0.0960036
1990-04-17	0.11	0.140931	0.0960036
1990-06-25	0.11	0.140931	0.0960036
1990-07-17	0.29	0.140931	0.0960036
1990-08-14	0.13	0.140931	0.0960036
1990-09-17	0.21	0.140931	0.0960036
1990-10-30	0.14	0.140931	0.0960036
1990-11-13	0.16	0.140931	0.0960036
1990-12-12	0.08	0.140931	0.0960036
1991-01-15	0.21	0.218863	0.0906207
1991-02-25	0.26	0.218863	0.0906207
1991-04-02	0.21	0.218863	0.0906207
1991-05-06	0.22	0.218863	0.0906207
1991-06-17	0.13	0.218863	0.0906207
1991-07-23	0.2	0.218863	0.0906207
1991-09-23	0.13	0.218863	0.0906207
1991-11-05	0.16	0.218863	0.0906207
1991-11-19	0.15	0.218863	0.0906207
1991-12-10	0.41	0.218863	0.0906207
1992-01-28	0.22	0.241938	0.114759
1992-02-26	0.2	0.241938	0.114759
1992-03-25	0.28	0.241938	0.114759
1992-05-14	0.44	0.241938	0.114759
1992-05-26	0.25	0.241938	0.114759
1992-06-17	0.25	0.241938	0.114759
1992-07-15	0.24	0.241938	0.114759
1992-08-18	0.15	0.241938	0.114759
1992-09-15	0.2	0.241938	0.114759
1992-10-14	0.24	0.241938	0.114759
1992-11-17	0.18	0.241938	0.114759
1992-12-15	0.24	0.241938	0.114759
1993-01-26	0.21	0.173385	0.0944085
1993-03-03	0.28	0.173385	0.0944085
1993-04-20	0.07	0.173385	0.0944085
1993-05-24	0.09	0.173385	0.0944085
1993-06-22	0.28	0.173385	0.0944085
1993-07-28	0.27	0.173385	0.0944085
1993-08-23	0.11	0.173385	0.0944085
1993-09-20	0.18	0.173385	0.0944085
1993-11-08	0.17	0.173385	0.0944085
1994-01-24	0.22	0.164588	0.0959775
1994-03-14	0.19	0.164588	0.0959775
1994-06-28	0.2	0.164588	0.0959775
1994-08-30	0.13	0.164588	0.0959775
1994-10-20	0.09	0.164588	0.0959775
1995-01-23	0.28	0.260997	0.106966
1995-02-21	0.18	0.260997	0.106966
1995-04-24	0.45	0.260997	0.106966
1995-06-14	0.13	0.260997	0.106966
1995-08-07	0.16	0.260997	0.106966
1995-10-12	0.12	0.260997	0.106966
1995-10-17	0.17	0.260997	0.106966
1995-12-06	0.15	0.260997	0.106966
1996-02-07	0.42	0.222484	0.1173
1996-03-27	0.07	0.222484	0.1173
1996-04-16	0.11	0.222484	0.1173
1996-05-01	0.37	0.222484	0.1173
1996-05-17	0.22	0.222484	0.1173
1996-05-31	0.11	0.222484	0.1173
1996-06-11	0.2	0.222484	0.1173
1996-06-21	0.17	0.222484	0.1173
1996-06-25	0.08	0.222484	0.1173
1996-07-23	0.18	0.222484	0.1173
1996-09-03	0.15	0.222484	0.1173
1996-09-17	0.18	0.222484	0.1173
1996-11-25	0.2	0.222484	0.1173
1997-01-15	0.2	0.154996	0.0992478
1997-02-03	0.17	0.154996	0.0992478
1997-02-20	0.21	0.154996	0.0992478
1997-03-14	0.06	0.154996	0.0992478
1997-03-26	0.15	0.154996	0.0992478
1997-04-08	0.1	0.154996	0.0992478
1997-04-24	0.23	0.154996	0.0992478
1997-05-06	0.2	0.154996	0.0992478
1997-06-09	0.25	0.154996	0.0992478
1997-06-19	0.1	0.154996	0.0992478
1997-07-09	0.15	0.154996	0.0992478
1997-08-04	0.15	0.154996	0.0992478
1997-08-26	0.13	0.154996	0.0992478
1997-09-23	0.15	0.154996	0.0992478
1997-11-17	0.11	0.154996	0.0992478
1997-12-16	0.08	0.154996	0.0992478
1998-01-28	0.17	0.172149	0.0933099
1998-02-27	0.23	0.172149	0.0933099
1998-03-18	0.15	0.172149	0.0933099
1998-04-30	0.14	0.172149	0.0933099
1998-05-13	0.06	0.172149	0.0933099
1998-05-28	0.15	0.172149	0.0933099
1998-06-09	0.24	0.172149	0.0933099
1998-06-25	0.3	0.172149	0.0933099
1998-07-09	0.16	0.172149	0.0933099
1998-07-30	0.35	0.172149	0.0933099
1998-08-19	0.22	0.172149	0.0933099
1998-09-28	0.11	0.172149	0.0933099
1998-11-18	0.13	0.172149	0.0933099
1998-12-08	0.09	0.172149	0.0933099
1999-01-12	0.24	0.246029	0.0997771
1999-02-10	0.27	0.246029	0.0997771
1999-03-15	0.28	0.246029	0.0997771
1999-03-30	0.2	0.246029	0.0997771
1999-04-19	0.171	0.246029	0.0997771
1999-04-28	0.27	0.246029	0.0997771
1999-05-06	0.27	0.246029	0.0997771
1999-05-26	0.2	0.246029	0.0997771
1999-06-10	0.36	0.246029	0.0997771
1999-06-24	0.34	0.246029	0.0997771
1999-07-21	0.3	0.246029	0.0997771
1999-08-05	0.23	0.246029	0.0997771
1999-09-14	0.18	0.246029	0.0997771
1999-11-11	0.155	0.246029	0.0997771
1999-12-01	0.138	0.246029	0.0997771
2000-01-27	0.187	0.220251	0.125931
2000-02-17	0.133	0.220251	0.125931
2000-03-14	0.2	0.220251	0.125931
2000-03-29	0.23	0.220251	0.125931
2000-05-10	0.156	0.220251	0.125931
2000-05-23	0.28	0.220251	0.125931
2000-06-06	0.204	0.220251	0.125931
2000-06-23	0.23	0.220251	0.125931
2000-07-18	0.29	0.220251	0.125931
2000-08-25	0.28	0.220251	0.125931
2000-09-21	0.189	0.220251	0.125931
2000-11-28	0.24	0.220251	0.125931
2000-12-14	0.177	0.220251	0.125931
2001-01-24	0.45	0.301025	#N/A
2001-02-27	0.43	0.301025	#N/A
2001-03-14	0.31	0.301025	#N/A
2001-04-02	0.36	0.301025	#N/A
2001-04-16	0.24	0.301025	#N/A
2001-04-23	0.36	0.301025	#N/A
2001-05-07	0.26	0.301025	#N/A
2001-05-21	0.24	0.301025	#N/A
2001-06-25	0.29	0.301025	#N/A
2001-07-10	0.33	0.301025	#N/A
2001-07-18	0.21	0.301025	#N/A
2001-08-27	0.172	0.301025	#N/A
2001-09-19	0.178	0.301025	#N/A
2001-10-30	0.21	0.301025	#N/A
2001-12-18	0.28	0.301025	#N/A
2002-01-22	0.181	0.219667	#N/A
2002-02-04	0.36	0.219667	#N/A
2002-02-18	0.23	0.219667	#N/A
2002-03-13	0.17	0.219667	#N/A
2002-03-25	0.38	0.219667	#N/A
2002-04-10	0.174	0.219667	#N/A
2002-04-22	0.167	0.219667	#N/A
2002-05-07	0.29	0.219667	#N/A
2002-05-28	0.2	0.219667	#N/A
2002-08-05	0.171	0.219667	#N/A
2002-08-19	0.186	0.219667	#N/A
2002-09-09	0.21	0.219667	#N/A
2002-11-12	0.21	0.219667	#N/A
2003-01-14	0.22	0.238341	#N/A
2003-01-28	0.173	0.238341	#N/A
2003-02-12	0.2	0.238341	#N/A
2003-02-24	0.43	0.238341	#N/A
2003-03-10	0.25	0.238341	#N/A
2003-03-24	0.184	0.238341	#N/A
2003-04-15	0.24	0.238341	#N/A
2003-04-29	0.174	0.238341	#N/A
2003-05-12	0.3	0.238341	#N/A
2003-05-27	0.21	0.238341	#N/A
2003-06-16	0.2	0.238341	#N/A
2003-07-14	0.169	0.238341	#N/A
2003-08-12	0.193	0.238341	#N/A
2003-09-23	0.196	0.238341	#N/A
2003-10-27	0.154	0.238341	#N/A
2003-12-09	0.35	0.238341	#N/A
2004-01-13	0.23	0.243509	#N/A
2004-01-29	0.25	0.243509	#N/A
2004-02-17	0.26	0.243509	#N/A
2004-03-02	0.2	0.243509	#N/A
2004-03-16	0.37	0.243509	#N/A
2004-03-30	0.22	0.243509	#N/A
2004-05-06	0.21	0.243509	#N/A
2004-05-18	0.24	0.243509	#N/A
2004-06-08	0.39	0.243509	#N/A
2004-06-22	0.25	0.243509	#N/A
2004-07-20	0.177	0.243509	#N/A
2004-08-17	0.172	0.243509	#N/A
2004-09-14	0.28	0.243509	#N/A
2004-10-26	0.184	0.243509	#N/A
2004-11-16	0.27	0.243509	#N/A
2004-12-21	0.22	0.243509	#N/A
2005-02-02	0.159	0.17629	#N/A
2005-03-22	0.174	0.17629	#N/A
2005-04-27	0.199	0.17629	#N/A
2005-05-10	0.22	0.17629	#N/A
2005-05-24	0.166	0.17629	#N/A
2005-06-14	0.167	0.17629	#N/A
2005-06-28	0.27	0.17629	#N/A
2005-07-12	0.19	0.17629	#N/A
2005-08-10	0.129	0.17629	#N/A
2005-09-07	0.21	0.17629	#N/A
2005-10-11	0.19	0.17629	#N/A
2005-11-16	0.161	0.17629	#N/A
2006-01-10	0.141	0.21537	#N/A
2006-02-14	0.24	0.21537	#N/A
2006-03-15	0.19	0.21537	#N/A
2006-04-05	0.22	0.21537	#N/A
2006-04-18	0.2	0.21537	#N/A
2006-05-09	0.21	0.21537	#N/A
2006-05-31	0.141	0.21537	#N/A
2006-06-14	0.16	0.21537	#N/A
2006-06-26	0.181	0.21537	#N/A
2006-07-17	0.172	0.21537	#N/A
2006-08-21	0.189	0.21537	#N/A
2006-09-19	0.18	0.21537	#N/A
2006-10-18	0.268	0.21537	#N/A
2006-11-13	0.271	0.21537	#N/A
2007-01-23	0.305	0.286594	#N/A
2007-02-26	0.181	0.286594	#N/A
2007-03-19	0.33	0.286594	#N/A
2007-04-02	0.359	0.286594	#N/A
2007-04-16	0.286	0.286594	#N/A
2007-04-30	0.268	0.286594	#N/A
2007-05-14	0.36	0.286594	#N/A
2007-06-11	0.282	0.286594	#N/A
2007-06-27	0.288	0.286594	#N/A
2007-07-25	0.323	0.286594	#N/A
2007-08-13	0.231	0.286594	#N/A
2007-08-29	0.219	0.286594	#N/A
2007-11-07	0.299	0.286594	#N/A
2007-12-11	0.186	0.286594	#N/A
2008-02-11	0.272	0.230759	#N/A
2008-04-07	0.188	0.230759	#N/A
2008-05-05	0.157	0.230759	#N/A
2008-05-27	0.207	0.230759	#N/A
2008-06-09	0.218	0.230759	#N/A
2008-06-23	0.37	0.230759	#N/A
2008-07-08	0.296	0.230759	#N/A
2008-08-18	0.26	0.230759	#N/A
2008-10-20	0.2	0.230759	#N/A
2008-11-17	0.236	0.230759	#N/A
2009-01-19	0.23	0.235599	#N/A
2009-02-03	0.193	0.235599	#N/A
2009-03-02	0.283	0.235599	#N/A
2009-04-06	0.249	0.235599	#N/A
2009-04-23	0.225	0.235599	#N/A
2009-05-04	0.184	0.235599	#N/A
2009-05-20	0.172	0.235599	#N/A
2009-06-01	0.163	0.235599	#N/A
2009-06-18	0.224	0.235599	#N/A
2009-08-13	0.23	0.235599	#N/A
2009-10-08	0.253	0.235599	#N/A
2009-12-02	0.286	0.235599	#N/A
2010-01-12	0.223	0.222653	#N/A
2010-02-16	0.173	0.222653	#N/A
2010-02-23	0.148	0.222653	#N/A
2010-03-11	0.16	0.222653	#N/A
2010-03-22	0.221	0.222653	#N/A
2010-04-07	0.176	0.222653	#N/A
2010-04-21	0.199	0.222653	#N/A
2010-05-05	0.212	0.222653	#N/A
2010-05-19	0.205	0.222653	#N/A
2010-06-02	0.168	0.222653	#N/A
2010-06-16	0.218	0.222653	#N/A
2010-08-11	0.343	0.222653	#N/A
2010-10-27	0.209	0.222653	#N/A
2010-12-08	0.242	0.222653	#N/A
2011-01-10	0.192	0.259295	#N/A
2011-02-09	0.163	0.259295	#N/A
2011-02-22	0.15	0.259295	#N/A
2011-03-08	0.541	0.259295	#N/A
2011-03-21	0.253	0.259295	#N/A
2011-04-06	0.147	0.259295	#N/A
2011-04-20	0.227	0.259295	#N/A
2011-06-27	0.253	0.259295	#N/A
2011-07-11	0.269	0.259295	#N/A
2011-07-25	0.261	0.259295	#N/A
2011-08-22	0.274	0.259295	#N/A
2011-10-24	0.181	0.259295	#N/A
2011-12-06	0.339	0.259295	#N/A
2012-01-17	0.181	0.197798	#N/A
2012-02-06	0.259	0.197798	#N/A
2012-02-22	0.193	0.197798	#N/A
2012-03-05	0.149	0.197798	#N/A
2012-03-19	0.229	0.197798	#N/A
2012-04-02	0.175	0.197798	#N/A
2012-04-16	0.183	0.197798	#N/A
2012-04-30	0.176	0.197798	#N/A
2012-05-14	0.246	0.197798	#N/A
2012-06-11	0.192	0.197798	#N/A
2012-06-25	0.187	0.197798	#N/A
2012-08-06	0.197	0.197798	#N/A
2012-10-22	0.181	0.197798	#N/A
2012-12-03	0.15	0.197798	#N/A
2013-01-15	0.322	0.257672	#N/A
2013-02-05	0.31	0.257672	#N/A
2013-02-18	0.301	0.257672	#N/A
2013-03-04	0.286	0.257672	#N/A
2013-03-18	0.172	0.257672	#N/A
2013-04-08	0.231	0.257672	#N/A
2013-04-22	0.275	0.257672	#N/A
2013-05-06	0.285	0.257672	#N/A
2013-05-20	0.164	0.257672	#N/A
2013-06-03	0.186	0.257672	#N/A
2013-06-17	0.317	0.257672	#N/A
2013-07-15	0.298	0.257672	#N/A
2013-07-30	0.23	0.257672	#N/A
2013-08-19	0.247	0.257672	#N/A

## Sheet: figure 7BC
Year	Simulation	Observation	Residue
1974	0.0938357	0.0851209	-0.00871483
1975	0.101751	0.168682	0.0669309
1976	0.127266	0.200447	0.0731804
1977	0.145025	0.278612	0.133586
1978	0.132163	0.241011	0.108847
1979	0.105387	0.192317	0.0869299
1980	0.110615	0.226194	0.115579
1981	0.14208	0.325086	0.183006
1982	0.12265	0.186922	0.0642721
1983	0.100536	0.183968	0.0834312
1984	0.107895	0.139125	0.0312301
1985	0.108098	0.153049	0.0449514
1986	0.116166	0.245759	0.129593
1987	0.113469	0.0957098	-0.017759
1988	0.114583	0.265044	0.15046
1989	0.0983327	0.223492	0.12516
1990	0.0960036	0.140931	0.0449272
1991	0.0906207	0.218863	0.128242
1992	0.114759	0.241938	0.127178
1993	0.0944085	0.173385	0.0789768
1994	0.0959775	0.164588	0.068611
1995	0.106966	0.260997	0.15403
1996	0.1173	0.222484	0.105184
1997	0.0992478	0.154996	0.0557483
1998	0.0933099	0.172149	0.0788392
1999	0.0997771	0.246029	0.146252
2000	0.125931	0.220251	0.0943205

## Sheet: figure 7D
datum	Observation	Year observation	Simulation
1970-01-12	0.95	0.478969	0.604384
1970-01-19	0.68	0.478969	0.604384
1970-01-29	1.4	0.478969	0.604384
1970-02-03	0.72	0.478969	0.604384
1970-02-14	0.49	0.478969	0.604384
1970-02-18	0.39	0.478969	0.604384
1970-02-24	0.72	0.478969	0.604384
1970-03-03	0.2	0.478969	0.604384
1970-03-12	0.28	0.478969	0.604384
1970-03-17	0.24	0.478969	0.604384
1970-03-22	0.59	0.478969	0.604384
1970-03-31	0.36	0.478969	0.604384
1970-04-10	0.44	0.478969	0.604384
1970-04-14	0.39	0.478969	0.604384
1970-04-19	0.29	0.478969	0.604384
1970-04-27	0.29	0.478969	0.604384
1970-05-06	0.39	0.478969	0.604384
1970-05-13	0.36	0.478969	0.604384
1970-05-22	0.42	0.478969	0.604384
1970-05-28	0.39	0.478969	0.604384
1970-06-04	0.52	0.478969	0.604384
1970-06-10	0.39	0.478969	0.604384
1970-06-19	0.31	0.478969	0.604384
1970-06-25	0.24	0.478969	0.604384
1970-07-01	0.52	0.478969	0.604384
1970-07-09	0.52	0.478969	0.604384
1970-07-14	0.46	0.478969	0.604384
1970-07-22	0.39	0.478969	0.604384
1970-07-28	0.62	0.478969	0.604384
1970-08-10	0.49	0.478969	0.604384
1970-08-19	0.24	0.478969	0.604384
1970-08-28	0.39	0.478969	0.604384
1970-09-01	0.39	0.478969	0.604384
1970-09-10	0.49	0.478969	0.604384
1970-09-15	0.52	0.478969	0.604384
1970-09-23	0.31	0.478969	0.604384
1970-09-29	0.72	0.478969	0.604384
1970-10-05	0.55	0.478969	0.604384
1970-10-13	0.39	0.478969	0.604384
1970-10-18	0.27	0.478969	0.604384
1970-10-28	0.52	0.478969	0.604384
1970-11-07	0.67	0.478969	0.604384
1970-11-16	0.38	0.478969	0.604384
1970-11-23	1	0.478969	0.604384
1970-12-02	0.49	0.478969	0.604384
1970-12-10	0.65	0.478969	0.604384
1970-12-19	0.65	0.478969	0.604384
1970-12-21	0.84	0.478969	0.604384
1970-12-29	0.62	0.478969	0.604384
1971-01-07	0.95	0.898528	0.872168
1971-01-13	0.95	0.898528	0.872168
1971-01-22	1.1	0.898528	0.872168
1971-01-28	0.26	0.898528	0.872168
1971-02-01	0.82	0.898528	0.872168
1971-02-10	0.72	0.898528	0.872168
1971-02-18	0.82	0.898528	0.872168
1971-02-25	0.78	0.898528	0.872168
1971-03-06	0.91	0.898528	0.872168
1971-03-10	0.98	0.898528	0.872168
1971-03-16	0.98	0.898528	0.872168
1971-03-24	0.95	0.898528	0.872168
1971-03-31	0.91	0.898528	0.872168
1971-04-05	0.82	0.898528	0.872168
1971-04-17	0.98	0.898528	0.872168
1971-04-22	0.78	0.898528	0.872168
1971-04-29	1	0.898528	0.872168
1971-05-05	0.98	0.898528	0.872168
1971-05-14	1.1	0.898528	0.872168
1971-05-18	0.95	0.898528	0.872168
1971-05-26	0.98	0.898528	0.872168
1971-06-02	0.68	0.898528	0.872168
1971-06-11	1.4	0.898528	0.872168
1971-06-16	0.78	0.898528	0.872168
1971-06-22	0.68	0.898528	0.872168
1971-06-30	0.59	0.898528	0.872168
1971-07-04	0.55	0.898528	0.872168
1971-07-15	0.88	0.898528	0.872168
1971-07-20	0.91	0.898528	0.872168
1971-07-26	0.72	0.898528	0.872168
1971-08-02	0.88	0.898528	0.872168
1971-08-09	0.82	0.898528	0.872168
1971-08-20	0.99	0.898528	0.872168
1971-08-25	0.88	0.898528	0.872168
1971-08-29	0.82	0.898528	0.872168
1971-09-08	0.91	0.898528	0.872168
1971-09-13	0.84	0.898528	0.872168
1971-09-20	0.55	0.898528	0.872168
1971-09-29	0.42	0.898528	0.872168
1971-10-04	0.95	0.898528	0.872168
1971-10-16	1.5	0.898528	0.872168
1971-10-20	1.6	0.898528	0.872168
1971-10-25	1.5	0.898528	0.872168
1971-11-02	1.1	0.898528	0.872168
1971-11-09	1.6	0.898528	0.872168
1971-11-15	1.3	0.898528	0.872168
1971-11-21	1.3	0.898528	0.872168
1971-11-30	1.1	0.898528	0.872168
1971-12-09	1.3	0.898528	0.872168
1971-12-15	1.1	0.898528	0.872168
1971-12-22	1.1	0.898528	0.872168
1971-12-27	0.88	0.898528	0.872168
1972-01-04	1	0.83213	0.869686
1972-01-11	1.2	0.83213	0.869686
1972-01-17	1.3	0.83213	0.869686
1972-01-26	1.2	0.83213	0.869686
1972-02-01	1.2	0.83213	0.869686
1972-02-09	1.4	0.83213	0.869686
1972-02-17	0.95	0.83213	0.869686
1972-02-23	1.2	0.83213	0.869686
1972-02-29	1.4	0.83213	0.869686
1972-03-09	1.2	0.83213	0.869686
1972-03-15	1.2	0.83213	0.869686
1972-03-22	1.1	0.83213	0.869686
1972-03-27	1.1	0.83213	0.869686
1972-04-04	0.78	0.83213	0.869686
1972-04-11	0.91	0.83213	0.869686
1972-04-20	0.72	0.83213	0.869686
1972-04-26	0.72	0.83213	0.869686
1972-05-03	0.88	0.83213	0.869686
1972-05-12	0.91	0.83213	0.869686
1972-05-18	1	0.83213	0.869686
1972-05-24	0.75	0.83213	0.869686
1972-05-31	0.72	0.83213	0.869686
1972-06-10	0.82	0.83213	0.869686
1972-06-15	0.75	0.83213	0.869686
1972-06-23	0.72	0.83213	0.869686
1972-06-28	0.72	0.83213	0.869686
1972-07-08	0.72	0.83213	0.869686
1972-07-13	0.84	0.83213	0.869686
1972-07-19	0.65	0.83213	0.869686
1972-07-25	0.62	0.83213	0.869686
1972-07-30	0.62	0.83213	0.869686
1972-08-10	0.55	0.83213	0.869686
1972-08-18	0.84	0.83213	0.869686
1972-08-23	0.72	0.83213	0.869686
1972-08-27	0.62	0.83213	0.869686
1972-09-10	0.88	0.83213	0.869686
1972-09-20	0.68	0.83213	0.869686
1972-09-25	0.82	0.83213	0.869686
1972-10-05	1.1	0.83213	0.869686
1972-10-12	0.98	0.83213	0.869686
1972-10-18	1	0.83213	0.869686
1972-10-28	1.1	0.83213	0.869686
1972-11-02	1	0.83213	0.869686
1972-11-06	1	0.83213	0.869686
1972-11-15	1.1	0.83213	0.869686
1972-11-24	0.68	0.83213	0.869686
1972-11-29	0.52	0.83213	0.869686
1972-12-09	0.72	0.83213	0.869686
1972-12-13	0.68	0.83213	0.869686
1972-12-21	0.73	0.83213	0.869686
1973-01-05	0.88	0.934792	0.804482
1973-01-15	1.3	0.934792	0.804482
1973-01-25	1.3	0.934792	0.804482
1973-01-28	1	0.934792	0.804482
1973-02-07	1.1	0.934792	0.804482
1973-02-14	1.7	0.934792	0.804482
1973-02-22	0.91	0.934792	0.804482
1973-03-01	0.95	0.934792	0.804482
1973-03-07	0.82	0.934792	0.804482
1973-03-13	0.95	0.934792	0.804482
1973-03-22	0.91	0.934792	0.804482
1973-03-31	1	0.934792	0.804482
1973-04-04	0.84	0.934792	0.804482
1973-04-12	0.82	0.934792	0.804482
1973-04-16	0.62	0.934792	0.804482
1973-04-25	0.88	0.934792	0.804482
1973-05-01	0.65	0.934792	0.804482
1973-05-07	0.68	0.934792	0.804482
1973-05-16	0.49	0.934792	0.804482
1973-05-25	0.62	0.934792	0.804482
1973-05-28	0.65	0.934792	0.804482
1973-06-04	1.5	0.934792	0.804482
1973-06-14	0.72	0.934792	0.804482
1973-06-25	1.4	0.934792	0.804482
1973-07-03	0.84	0.934792	0.804482
1973-07-12	0.68	0.934792	0.804482
1973-07-15	0.78	0.934792	0.804482
1973-07-25	0.82	0.934792	0.804482
1973-08-02	0.75	0.934792	0.804482
1973-08-08	0.72	0.934792	0.804482
1973-08-15	0.84	0.934792	0.804482
1973-08-22	0.84	0.934792	0.804482
1973-08-30	1.1	0.934792	0.804482
1973-09-06	1.2	0.934792	0.804482
1973-09-10	1	0.934792	0.804482
1973-09-19	0.75	0.934792	0.804482
1973-09-29	1.5	0.934792	0.804482
1973-10-04	0.78	0.934792	0.804482
1973-10-09	1.21	0.934792	0.804482
1973-10-17	1.6	0.934792	0.804482
1973-10-27	1.3	0.934792	0.804482
1973-11-01	0.78	0.934792	0.804482
1973-11-09	1.8	0.934792	0.804482
1973-11-14	1.5	0.934792	0.804482
1973-11-18	1.3	0.934792	0.804482
1973-11-29	0.82	0.934792	0.804482
1973-12-07	1.2	0.934792	0.804482
1973-12-12	0.84	0.934792	0.804482
1973-12-21	0.88	0.934792	0.804482
1973-12-27	0.59	0.934792	0.804482
1974-01-05	0.95	0.789947	0.727252
1974-01-15	0.88	0.789947	0.727252
1974-01-19	0.93	0.789947	0.727252
1974-01-24	0.52	0.789947	0.727252
1974-02-01	0.82	0.789947	0.727252
1974-02-05	0.65	0.789947	0.727252
1974-02-15	0.72	0.789947	0.727252
1974-02-20	0.42	0.789947	0.727252
1974-03-02	0.89	0.789947	0.727252
1974-03-05	0.62	0.789947	0.727252
1974-03-14	1.24	0.789947	0.727252
1974-03-20	0.76	0.789947	0.727252
1974-03-27	0.83	0.789947	0.727252
1974-04-02	0.78	0.789947	0.727252
1974-04-08	0.83	0.789947	0.727252
1974-04-18	0.84	0.789947	0.727252
1974-04-21	1.11	0.789947	0.727252
1974-05-01	1.66	0.789947	0.727252
1974-05-06	1.14	0.789947	0.727252
1974-05-16	0.78	0.789947	0.727252
1974-05-22	0.96	0.789947	0.727252
1974-05-29	0.89	0.789947	0.727252
1974-06-07	1.32	0.789947	0.727252
1974-06-13	0.84	0.789947	0.727252
1974-06-19	1.04	0.789947	0.727252
1974-06-26	0.84	0.789947	0.727252
1974-07-05	0.91	0.789947	0.727252
1974-07-10	0.69	0.789947	0.727252
1974-07-15	0.74	0.789947	0.727252
1974-07-23	0.73	0.789947	0.727252
1974-07-30	0.7	0.789947	0.727252
1974-08-07	0.69	0.789947	0.727252
1974-08-17	0.78	0.789947	0.727252
1974-08-21	0.8	0.789947	0.727252
1974-08-29	0.81	0.789947	0.727252
1974-09-05	0.76	0.789947	0.727252
1974-09-10	0.96	0.789947	0.727252
1974-09-18	0.85	0.789947	0.727252
1974-09-22	0.95	0.789947	0.727252
1974-09-30	1.02	0.789947	0.727252
1974-10-08	0.92	0.789947	0.727252
1974-10-14	0.87	0.789947	0.727252
1974-10-24	1.07	0.789947	0.727252
1974-10-29	0.74	0.789947	0.727252
1974-11-06	0.57	0.789947	0.727252
1974-11-13	0.63	0.789947	0.727252
1974-11-21	0.62	0.789947	0.727252
1974-11-25	0.57	0.789947	0.727252
1974-12-03	0.73	0.789947	0.727252
1974-12-10	0.46	0.789947	0.727252
1974-12-15	0.69	0.789947	0.727252
1975-01-07	0.5	0.694438	0.628379
1975-01-08	0.6	0.694438	0.628379
1975-01-17	0.64	0.694438	0.628379
1975-01-21	0.6	0.694438	0.628379
1975-01-28	0.77	0.694438	0.628379
1975-02-04	0.44	0.694438	0.628379
1975-02-14	0.63	0.694438	0.628379
1975-02-18	0.6	0.694438	0.628379
1975-02-24	0.7	0.694438	0.628379
1975-03-05	0.77	0.694438	0.628379
1975-03-10	0.86	0.694438	0.628379
1975-03-19	0.93	0.694438	0.628379
1975-03-25	0.88	0.694438	0.628379
1975-04-02	0.57	0.694438	0.628379
1975-04-16	0.69	0.694438	0.628379
1975-04-25	0.56	0.694438	0.628379
1975-05-01	0.73	0.694438	0.628379
1975-05-10	0.73	0.694438	0.628379
1975-05-15	0.76	0.694438	0.628379
1975-05-24	0.84	0.694438	0.628379
1975-05-28	0.71	0.694438	0.628379
1975-06-05	0.8	0.694438	0.628379
1975-06-09	0.62	0.694438	0.628379
1975-06-15	0.83	0.694438	0.628379
1975-06-23	0.65	0.694438	0.628379
1975-06-29	0.7	0.694438	0.628379
1975-07-10	0.68	0.694438	0.628379
1975-07-15	0.6	0.694438	0.628379
1975-07-21	0.56	0.694438	0.628379
1975-07-31	0.55	0.694438	0.628379
1975-08-07	0.67	0.694438	0.628379
1975-08-11	0.66	0.694438	0.628379
1975-08-19	#N/A	0.694438	0.628379
1975-08-27	0.71	0.694438	0.628379
1975-09-02	0.49	0.694438	0.628379
1975-09-12	0.65	0.694438	0.628379
1975-09-16	0.71	0.694438	0.628379
1975-09-25	0.73	0.694438	0.628379
1975-10-02	0.52	0.694438	0.628379
1975-10-11	0.69	0.694438	0.628379
1975-10-15	0.89	0.694438	0.628379
1975-10-22	0.85	0.694438	0.628379
1975-10-30	0.88	0.694438	0.628379
1975-11-05	0.92	0.694438	0.628379
1975-11-12	1.01	0.694438	0.628379
1975-11-17	1.3	0.694438	0.628379
1975-11-27	0.95	0.694438	0.628379
1975-11-30	0.8	0.694438	0.628379
1975-12-10	0.74	0.694438	0.628379
1975-12-18	0.9	0.694438	0.628379
1975-12-23	0.95	0.694438	0.628379
1976-01-04	1.16	0.917062	0.845957
1976-01-08	0.62	0.917062	0.845957
1976-01-13	0.96	0.917062	0.845957
1976-01-21	0.47	0.917062	0.845957
1976-02-01	0.62	0.917062	0.845957
1976-02-05	0.8	0.917062	0.845957
1976-02-09	0.71	0.917062	0.845957
1976-02-18	0.84	0.917062	0.845957
1976-02-25	0.77	0.917062	0.845957
1976-03-04	0.84	0.917062	0.845957
1976-03-14	0.99	0.917062	0.845957
1976-03-17	0.96	0.917062	0.845957
1976-03-27	1.1	0.917062	0.845957
1976-04-01	1.02	0.917062	0.845957
1976-04-08	1.19	0.917062	0.845957
1976-04-14	1.03	0.917062	0.845957
1976-04-23	1.05	0.917062	0.845957
1976-04-26	1.08	0.917062	0.845957
1976-05-06	1.28	0.917062	0.845957
1976-05-12	1.05	0.917062	0.845957
1976-05-22	1	0.917062	0.845957
1976-05-25	0.9	0.917062	0.845957
1976-06-05	0.98	0.917062	0.845957
1976-06-09	0.84	0.917062	0.845957
1976-06-19	0.97	0.917062	0.845957
1976-06-23	0.7	0.917062	0.845957
1976-07-01	1.04	0.917062	0.845957
1976-07-06	0.98	0.917062	0.845957
1976-07-16	1	0.917062	0.845957
1976-07-20	1.02	0.917062	0.845957
1976-07-26	1.12	0.917062	0.845957
1976-08-03	0.54	0.917062	0.845957
1976-08-10	0.76	0.917062	0.845957
1976-08-17	0.91	0.917062	0.845957
1976-08-25	0.98	0.917062	0.845957
1976-08-31	0.86	0.917062	0.845957
1976-09-07	1.02	0.917062	0.845957
1976-09-14	0.99	0.917062	0.845957
1976-09-22	1.06	0.917062	0.845957
1976-09-29	0.94	0.917062	0.845957
1976-10-05	1.04	0.917062	0.845957
1976-10-14	1.08	0.917062	0.845957
1976-10-18	1.05	0.917062	0.845957
1976-10-27	1	0.917062	0.845957
1976-11-05	1.17	0.917062	0.845957
1976-11-11	1.25	0.917062	0.845957
1976-11-15	1.1	0.917062	0.845957
1976-11-24	1.12	0.917062	0.845957
1976-12-02	1.28	0.917062	0.845957
1976-12-09	0.78	0.917062	0.845957
1976-12-15	0.83	0.917062	0.845957
1976-12-22	0.83	0.917062	0.845957
1977-01-06	0.98	0.751961	0.6378
1977-01-11	1.11	0.751961	0.6378
1977-01-22	1.07	0.751961	0.6378
1977-01-25	0.87	0.751961	0.6378
1977-02-05	0.74	0.751961	0.6378
1977-02-09	0.72	0.751961	0.6378
1977-02-14	0.7	0.751961	0.6378
1977-02-23	1.05	0.751961	0.6378
1977-03-05	0.55	0.751961	0.6378
1977-03-09	0.52	0.751961	0.6378
1977-03-16	0.69	0.751961	0.6378
1977-03-23	0.71	0.751961	0.6378
1977-03-30	0.82	0.751961	0.6378
1977-04-06	1.1	0.751961	0.6378
1977-04-12	0.62	0.751961	0.6378
1977-04-20	0.61	0.751961	0.6378
1977-04-25	0.63	0.751961	0.6378
1977-05-04	0.57	0.751961	0.6378
1977-05-10	0.54	0.751961	0.6378
1977-05-17	0.66	0.751961	0.6378
1977-05-26	0.68	0.751961	0.6378
1977-06-01	0.64	0.751961	0.6378
1977-06-10	0.76	0.751961	0.6378
1977-06-15	0.8	0.751961	0.6378
1977-06-21	0.76	0.751961	0.6378
1977-06-29	0.7	0.751961	0.6378
1977-07-07	0.65	0.751961	0.6378
1977-07-13	0.75	0.751961	0.6378
1977-07-22	0.63	0.751961	0.6378
1977-07-27	0.73	0.751961	0.6378
1977-08-02	0.69	0.751961	0.6378
1977-08-10	0.53	0.751961	0.6378
1977-08-21	0.72	0.751961	0.6378
1977-08-24	0.7	0.751961	0.6378
1977-09-04	0.64	0.751961	0.6378
1977-09-07	0.65	0.751961	0.6378
1977-09-18	0.73	0.751961	0.6378
1977-09-21	0.83	0.751961	0.6378
1977-09-26	0.76	0.751961	0.6378
1977-10-05	0.9	0.751961	0.6378
1977-10-15	1.14	0.751961	0.6378
1977-10-19	0.87	0.751961	0.6378
1977-10-26	0.96	0.751961	0.6378
1977-11-02	1.04	0.751961	0.6378
1977-11-09	1.22	0.751961	0.6378
1977-11-16	0.83	0.751961	0.6378
1977-11-21	0.83	0.751961	0.6378
1977-11-30	0.58	0.751961	0.6378
1977-12-09	0.81	0.751961	0.6378
1977-12-14	0.74	0.751961	0.6378
1977-12-23	0.7	0.751961	0.6378
1977-12-29	0.73	0.751961	0.6378
1978-01-02	0.58	0.679718	0.602402
1978-01-05	0.65	0.679718	0.602402
1978-01-11	0.69	0.679718	0.602402
1978-01-17	0.66	0.679718	0.602402
1978-01-25	0.85	0.679718	0.602402
1978-01-30	0.42	0.679718	0.602402
1978-02-03	0.73	0.679718	0.602402
1978-02-08	0.64	0.679718	0.602402
1978-02-13	0.72	0.679718	0.602402
1978-02-17	0.77	0.679718	0.602402
1978-02-22	0.78	0.679718	0.602402
1978-02-27	0.58	0.679718	0.602402
1978-03-02	0.81	0.679718	0.602402
1978-03-08	0.52	0.679718	0.602402
1978-03-13	0.6	0.679718	0.602402
1978-03-13	0.58	0.679718	0.602402
1978-03-22	0.6	0.679718	0.602402
1978-03-27	0.42	0.679718	0.602402
1978-03-29	0.47	0.679718	0.602402
1978-04-05	0.48	0.679718	0.602402
1978-04-10	0.56	0.679718	0.602402
1978-04-10	0.47	0.679718	0.602402
1978-04-19	0.59	0.679718	0.602402
1978-04-24	0.65	0.679718	0.602402
1978-04-24	0.65	0.679718	0.602402
1978-05-10	0.63	0.679718	0.602402
1978-05-17	0.63	0.679718	0.602402
1978-05-22	0.58	0.679718	0.602402
1978-05-27	1.25	0.679718	0.602402
1978-05-31	0.83	0.679718	0.602402
1978-06-05	0.5	0.679718	0.602402
1978-06-11	0.57	0.679718	0.602402
1978-06-14	0.53	0.679718	0.602402
1978-06-19	0.49	0.679718	0.602402
1978-06-21	0.53	0.679718	0.602402
1978-06-28	0.56	0.679718	0.602402
1978-07-03	0.49	0.679718	0.602402
1978-07-04	0.64	0.679718	0.602402
1978-07-12	0.56	0.679718	0.602402
1978-07-17	0.54	0.679718	0.602402
1978-07-18	0.49	0.679718	0.602402
1978-07-26	0.52	0.679718	0.602402
1978-07-31	0.56	0.679718	0.602402
1978-08-08	0.65	0.679718	0.602402
1978-08-19	0.51	0.679718	0.602402
1978-08-23	0.58	0.679718	0.602402
1978-08-28	0.71	0.679718	0.602402
1978-09-01	0.7	0.679718	0.602402
1978-09-06	0.71	0.679718	0.602402
1978-09-11	0.74	0.679718	0.602402
1978-09-16	0.8	0.679718	0.602402
1978-09-20	0.79	0.679718	0.602402
1978-09-25	0.85	0.679718	0.602402
1978-09-27	0.82	0.679718	0.602402
1978-10-04	0.74	0.679718	0.602402
1978-10-09	0.88	0.679718	0.602402
1978-10-12	0.86	0.679718	0.602402
1978-10-18	0.9	0.679718	0.602402
1978-10-23	1.16	0.679718	0.602402
1978-10-29	0.9	0.679718	0.602402
1978-11-01	0.97	0.679718	0.602402
1978-11-06	0.98	0.679718	0.602402
1978-11-11	0.92	0.679718	0.602402
1978-11-15	0.98	0.679718	0.602402
1978-11-20	0.82	0.679718	0.602402
1978-11-23	1.12	0.679718	0.602402
1978-11-29	1.21	0.679718	0.602402
1978-12-04	1.11	0.679718	0.602402
1978-12-10	1.3	0.679718	0.602402
1978-12-13	1.32	0.679718	0.602402
1978-12-18	0.9	0.679718	0.602402
1978-12-22	0.89	0.679718	0.602402
1978-12-28	0.92	0.679718	0.602402
1979-01-01	0.8	0.666102	0.578584
1979-01-02	1.04	0.666102	0.578584
1979-01-11	0.69	0.666102	0.578584
1979-01-15	0.7	0.666102	0.578584
1979-01-17	0.72	0.666102	0.578584
1979-01-25	1.15	0.666102	0.578584
1979-01-29	0.78	0.666102	0.578584
1979-01-31	0.86	0.666102	0.578584
1979-02-06	0.95	0.666102	0.578584
1979-02-12	0.44	0.666102	0.578584
1979-02-19	0.43	0.666102	0.578584
1979-02-26	0.56	0.666102	0.578584
1979-02-26	0.54	0.666102	0.578584
1979-03-05	0.68	0.666102	0.578584
1979-03-12	0.6	0.666102	0.578584
1979-03-12	0.64	0.666102	0.578584
1979-03-20	0.46	0.666102	0.578584
1979-03-26	0.48	0.666102	0.578584
1979-03-28	0.53	0.666102	0.578584
1979-04-06	0.56	0.666102	0.578584
1979-04-09	0.54	0.666102	0.578584
1979-04-11	0.54	0.666102	0.578584
1979-04-21	0.69	0.666102	0.578584
1979-04-23	0.74	0.666102	0.578584
1979-04-25	0.7	0.666102	0.578584
1979-05-06	0.69	0.666102	0.578584
1979-05-07	0.55	0.666102	0.578584
1979-05-09	0.6	0.666102	0.578584
1979-05-14	0.57	0.666102	0.578584
1979-05-21	0.56	0.666102	0.578584
1979-05-21	0.55	0.666102	0.578584
1979-05-31	0.61	0.666102	0.578584
1979-06-04	0.53	0.666102	0.578584
1979-06-06	0.57	0.666102	0.578584
1979-06-16	0.55	0.666102	0.578584
1979-06-18	0.52	0.666102	0.578584
1979-06-20	0.61	0.666102	0.578584
1979-06-26	0.55	0.666102	0.578584
1979-07-04	0.62	0.666102	0.578584
1979-07-11	0.69	0.666102	0.578584
1979-07-16	0.77	0.666102	0.578584
1979-07-18	0.81	0.666102	0.578584
1979-07-29	0.74	0.666102	0.578584
1979-07-30	0.84	0.666102	0.578584
1979-08-01	0.83	0.666102	0.578584
1979-08-10	0.93	0.666102	0.578584
1979-08-13	0.8	0.666102	0.578584
1979-08-15	0.81	0.666102	0.578584
1979-08-25	0.73	0.666102	0.578584
1979-08-27	0.68	0.666102	0.578584
1979-08-29	0.73	0.666102	0.578584
1979-09-07	0.78	0.666102	0.578584
1979-09-10	0.88	0.666102	0.578584
1979-09-12	0.75	0.666102	0.578584
1979-09-23	0.98	0.666102	0.578584
1979-09-24	0.86	0.666102	0.578584
1979-09-26	1.02	0.666102	0.578584
1979-10-03	0.86	0.666102	0.578584
1979-10-08	0.96	0.666102	0.578584
1979-10-10	0.99	0.666102	0.578584
1979-10-15	0.93	0.666102	0.578584
1979-10-22	0.87	0.666102	0.578584
1979-10-24	0.91	0.666102	0.578584
1979-11-02	1.03	0.666102	0.578584
1979-11-05	0.81	0.666102	0.578584
1979-11-07	0.92	0.666102	0.578584
1979-11-13	0.81	0.666102	0.578584
1979-11-19	0.62	0.666102	0.578584
1979-11-21	0.56	0.666102	0.578584
1979-11-28	0.73	0.666102	0.578584
1979-12-03	0.75	0.666102	0.578584
1979-12-05	0.82	0.666102	0.578584
1979-12-12	0.97	0.666102	0.578584
1979-12-17	0.5	0.666102	0.578584
1979-12-19	0.52	0.666102	0.578584
1979-12-29	0.51	0.666102	0.578584
1979-12-31	0.51	0.666102	0.578584
1980-01-04	0.5	0.610082	0.574165
1980-01-09	0.56	0.610082	0.574165
1980-01-14	0.65	0.610082	0.574165
1980-01-19	0.64	0.610082	0.574165
1980-01-23	0.75	0.610082	0.574165
1980-01-28	0.64	0.610082	0.574165
1980-02-01	0.7	0.610082	0.574165
1980-02-06	0.77	0.610082	0.574165
1980-02-11	0.42	0.610082	0.574165
1980-02-14	0.44	0.610082	0.574165
1980-02-20	0.46	0.610082	0.574165
1980-02-25	0.55	0.610082	0.574165
1980-02-26	0.52	0.610082	0.574165
1980-03-05	0.67	0.610082	0.574165
1980-03-10	0.79	0.610082	0.574165
1980-03-11	0.75	0.610082	0.574165
1980-03-19	0.72	0.610082	0.574165
1980-03-24	0.76	0.610082	0.574165
1980-03-25	0.77	0.610082	0.574165
1980-04-02	0.78	0.610082	0.574165
1980-04-07	0.55	0.610082	0.574165
1980-04-08	0.5	0.610082	0.574165
1980-04-16	0.67	0.610082	0.574165
1980-04-21	0.64	0.610082	0.574165
1980-04-24	0.67	0.610082	0.574165
1980-05-01	0.67	0.610082	0.574165
1980-05-05	0.57	0.610082	0.574165
1980-05-07	0.64	0.610082	0.574165
1980-05-12	0.59	0.610082	0.574165
1980-05-19	0.69	0.610082	0.574165
1980-05-22	0.66	0.610082	0.574165
1980-05-28	0.66	0.610082	0.574165
1980-06-02	0.66	0.610082	0.574165
1980-06-05	0.68	0.610082	0.574165
1980-06-11	0.69	0.610082	0.574165
1980-06-16	0.56	0.610082	0.574165
1980-06-19	0.65	0.610082	0.574165
1980-06-25	0.54	0.610082	0.574165
1980-06-30	0.5	0.610082	0.574165
1980-06-30	0.56	0.610082	0.574165
1980-07-09	0.44	0.610082	0.574165
1980-07-14	0.42	0.610082	0.574165
1980-07-16	0.44	0.610082	0.574165
1980-07-23	0.39	0.610082	0.574165
1980-07-28	0.43	0.610082	0.574165
1980-07-28	0.4	0.610082	0.574165
1980-08-06	0.53	0.610082	0.574165
1980-08-11	0.54	0.610082	0.574165
1980-08-20	0.59	0.610082	0.574165
1980-08-25	0.6	0.610082	0.574165
1980-08-28	0.55	0.610082	0.574165
1980-09-03	0.64	0.610082	0.574165
1980-09-08	0.67	0.610082	0.574165
1980-09-11	0.72	0.610082	0.574165
1980-09-17	0.73	0.610082	0.574165
1980-09-22	0.52	0.610082	0.574165
1980-09-25	0.76	0.610082	0.574165
1980-10-01	0.87	0.610082	0.574165
1980-10-06	0.84	0.610082	0.574165
1980-10-06	0.85	0.610082	0.574165
1980-10-15	0.82	0.610082	0.574165
1980-10-20	0.67	0.610082	0.574165
1980-10-23	0.79	0.610082	0.574165
1980-10-29	0.7	0.610082	0.574165
1980-11-03	0.74	0.610082	0.574165
1980-11-05	0.7	0.610082	0.574165
1980-11-12	0.79	0.610082	0.574165
1980-11-17	0.75	0.610082	0.574165
1980-11-20	0.8	0.610082	0.574165
1980-11-26	0.78	0.610082	0.574165
1980-12-01	0.74	0.610082	0.574165
1980-12-04	0.8	0.610082	0.574165
1980-12-10	0.78	0.610082	0.574165
1980-12-15	0.62	0.610082	0.574165
1980-12-18	0.94	0.610082	0.574165
1980-12-22	0.63	0.610082	0.574165
1981-01-07	0.79	0.562991	0.496196
1981-01-12	0.5	0.562991	0.496196
1981-01-15	0.58	0.562991	0.496196
1981-01-21	0.56	0.562991	0.496196
1981-01-26	0.56	0.562991	0.496196
1981-01-29	0.73	0.562991	0.496196
1981-02-04	0.68	0.562991	0.496196
1981-02-09	0.49	0.562991	0.496196
1981-02-12	0.62	0.562991	0.496196
1981-02-18	0.53	0.562991	0.496196
1981-02-23	0.61	0.562991	0.496196
1981-02-26	0.61	0.562991	0.496196
1981-03-04	0.79	0.562991	0.496196
1981-03-12	0.74	0.562991	0.496196
1981-03-18	0.46	0.562991	0.496196
1981-03-23	0.46	0.562991	0.496196
1981-03-26	0.45	0.562991	0.496196
1981-04-01	0.44	0.562991	0.496196
1981-04-09	0.5	0.562991	0.496196
1981-04-15	0.57	0.562991	0.496196
1981-04-20	0.62	0.562991	0.496196
1981-04-23	0.58	0.562991	0.496196
1981-04-28	0.59	0.562991	0.496196
1981-05-04	0.65	0.562991	0.496196
1981-05-07	0.61	0.562991	0.496196
1981-05-13	0.8	0.562991	0.496196
1981-05-18	0.71	0.562991	0.496196
1981-05-21	0.7	0.562991	0.496196
1981-05-26	0.71	0.562991	0.496196
1981-06-01	0.55	0.562991	0.496196
1981-06-04	0.58	0.562991	0.496196
1981-06-10	0.57	0.562991	0.496196
1981-06-16	0.66	0.562991	0.496196
1981-06-18	0.64	0.562991	0.496196
1981-06-24	0.65	0.562991	0.496196
1981-06-29	0.65	0.562991	0.496196
1981-07-02	0.64	0.562991	0.496196
1981-07-08	0.67	0.562991	0.496196
1981-07-13	0.61	0.562991	0.496196
1981-07-16	0.64	0.562991	0.496196
1981-07-21	0.62	0.562991	0.496196
1981-07-27	0.48	0.562991	0.496196
1981-07-30	0.49	0.562991	0.496196
1981-08-05	0.47	0.562991	0.496196
1981-08-10	0.54	0.562991	0.496196
1981-08-13	0.69	0.562991	0.496196
1981-08-19	0.59	0.562991	0.496196
1981-08-24	0.61	0.562991	0.496196
1981-08-27	0.61	0.562991	0.496196
1981-09-02	0.66	0.562991	0.496196
1981-09-07	0.68	0.562991	0.496196
1981-09-10	0.81	0.562991	0.496196
1981-09-16	0.71	0.562991	0.496196
1981-09-21	0.63	0.562991	0.496196
1981-09-24	0.78	0.562991	0.496196
1981-09-30	0.78	0.562991	0.496196
1981-10-05	0.65	0.562991	0.496196
1981-10-08	0.58	0.562991	0.496196
1981-10-14	0.71	0.562991	0.496196
1981-10-19	0.46	0.562991	0.496196
1981-10-22	0.48	0.562991	0.496196
1981-10-28	0.41	0.562991	0.496196
1981-11-02	0.38	0.562991	0.496196
1981-11-05	0.44	0.562991	0.496196
1981-11-11	0.48	0.562991	0.496196
1981-11-16	0.53	0.562991	0.496196
1981-11-19	0.56	0.562991	0.496196
1981-11-25	0.61	0.562991	0.496196
1981-11-30	0.48	0.562991	0.496196
1981-12-03	0.63	0.562991	0.496196
1981-12-09	0.47	0.562991	0.496196
1981-12-14	0.37	0.562991	0.496196
1981-12-17	0.48	0.562991	0.496196
1981-12-23	0.42	0.562991	0.496196
1981-12-28	0.44	0.562991	0.496196
1981-12-30	0.44	0.562991	0.496196
1982-01-06	0.43	0.525497	0.518161
1982-01-11	0.36	0.525497	0.518161
1982-01-14	0.36	0.525497	0.518161
1982-01-20	0.34	0.525497	0.518161
1982-01-25	0.42	0.525497	0.518161
1982-01-28	0.44	0.525497	0.518161
1982-02-03	0.53	0.525497	0.518161
1982-02-08	0.41	0.525497	0.518161
1982-02-10	0.38	0.525497	0.518161
1982-02-17	0.45	0.525497	0.518161
1982-02-22	0.5	0.525497	0.518161
1982-02-25	0.49	0.525497	0.518161
1982-03-03	0.58	0.525497	0.518161
1982-03-08	0.52	0.525497	0.518161
1982-03-10	0.53	0.525497	0.518161
1982-03-22	0.54	0.525497	0.518161
1982-03-25	0.48	0.525497	0.518161
1982-03-31	0.53	0.525497	0.518161
1982-04-05	0.45	0.525497	0.518161
1982-04-07	0.58	0.525497	0.518161
1982-04-14	0.44	0.525497	0.518161
1982-04-19	0.53	0.525497	0.518161
1982-04-22	0.58	0.525497	0.518161
1982-04-28	0.63	0.525497	0.518161
1982-05-03	0.68	0.525497	0.518161
1982-05-06	0.66	0.525497	0.518161
1982-05-12	0.6	0.525497	0.518161
1982-05-17	0.56	0.525497	0.518161
1982-05-26	0.53	0.525497	0.518161
1982-05-31	0.52	0.525497	0.518161
1982-06-03	0.57	0.525497	0.518161
1982-06-09	0.52	0.525497	0.518161
1982-06-14	0.49	0.525497	0.518161
1982-06-16	0.53	0.525497	0.518161
1982-06-23	0.51	0.525497	0.518161
1982-06-28	0.47	0.525497	0.518161
1982-07-01	0.5	0.525497	0.518161
1982-07-07	0.46	0.525497	0.518161
1982-07-12	0.5	0.525497	0.518161
1982-07-15	0.52	0.525497	0.518161
1982-07-21	0.53	0.525497	0.518161
1982-07-26	0.5	0.525497	0.518161
1982-07-29	0.64	0.525497	0.518161
1982-08-04	0.48	0.525497	0.518161
1982-08-09	0.54	0.525497	0.518161
1982-08-12	0.52	0.525497	0.518161
1982-08-18	0.55	0.525497	0.518161
1982-08-23	0.52	0.525497	0.518161
1982-08-26	0.51	0.525497	0.518161
1982-09-01	0.63	0.525497	0.518161
1982-09-06	0.56	0.525497	0.518161
1982-09-09	0.63	0.525497	0.518161
1982-09-15	0.61	0.525497	0.518161
1982-09-20	0.76	0.525497	0.518161
1982-09-23	0.71	0.525497	0.518161
1982-09-29	0.69	0.525497	0.518161
1982-10-04	0.76	0.525497	0.518161
1982-10-07	0.78	0.525497	0.518161
1982-10-13	0.67	0.525497	0.518161
1982-10-18	0.58	0.525497	0.518161
1982-10-21	0.54	0.525497	0.518161
1982-10-27	0.53	0.525497	0.518161
1982-11-01	0.63	0.525497	0.518161
1982-11-04	0.61	0.525497	0.518161
1982-11-10	0.68	0.525497	0.518161
1982-11-15	0.7	0.525497	0.518161
1982-11-18	0.7	0.525497	0.518161
1982-11-24	0.61	0.525497	0.518161
1982-11-29	0.59	0.525497	0.518161
1982-12-02	0.59	0.525497	0.518161
1982-12-08	0.65	0.525497	0.518161
1982-12-13	0.62	0.525497	0.518161
1982-12-16	0.69	0.525497	0.518161
1982-12-22	0.66	0.525497	0.518161
1982-12-27	0.39	0.525497	0.518161
1982-12-30	0.35	0.525497	0.518161
1983-01-05	0.47	0.508549	0.51857
1983-01-10	0.44	0.508549	0.51857
1983-01-13	0.42	0.508549	0.51857
1983-01-19	0.45	0.508549	0.51857
1983-01-24	0.45	0.508549	0.51857
1983-01-27	0.43	0.508549	0.51857
1983-02-02	0.56	0.508549	0.51857
1983-02-07	0.4	0.508549	0.51857
1983-02-10	0.4	0.508549	0.51857
1983-02-24	0.56	0.508549	0.51857
1983-03-02	0.61	0.508549	0.51857
1983-03-07	0.52	0.508549	0.51857
1983-03-10	0.5	0.508549	0.51857
1983-03-16	0.6	0.508549	0.51857
1983-03-21	0.38	0.508549	0.51857
1983-03-24	0.54	0.508549	0.51857
1983-03-30	0.46	0.508549	0.51857
1983-04-04	0.44	0.508549	0.51857
1983-04-07	0.47	0.508549	0.51857
1983-04-13	0.62	0.508549	0.51857
1983-04-18	0.36	0.508549	0.51857
1983-04-21	0.33	0.508549	0.51857
1983-04-27	0.4	0.508549	0.51857
1983-05-02	0.43	0.508549	0.51857
1983-05-03	0.42	0.508549	0.51857
1983-05-10	0.42	0.508549	0.51857
1983-05-16	0.48	0.508549	0.51857
1983-05-19	0.41	0.508549	0.51857
1983-05-25	0.41	0.508549	0.51857
1983-05-30	0.38	0.508549	0.51857
1983-06-02	0.28	0.508549	0.51857
1983-06-08	0.38	0.508549	0.51857
1983-06-13	0.42	0.508549	0.51857
1983-06-16	0.58	0.508549	0.51857
1983-06-22	0.42	0.508549	0.51857
1983-06-27	0.48	0.508549	0.51857
1983-06-30	0.54	0.508549	0.51857
1983-07-06	0.56	0.508549	0.51857
1983-07-11	0.54	0.508549	0.51857
1983-07-14	0.58	0.508549	0.51857
1983-07-20	0.59	0.508549	0.51857
1983-07-25	0.5	0.508549	0.51857
1983-07-28	0.65	0.508549	0.51857
1983-08-03	0.61	0.508549	0.51857
1983-08-08	0.57	0.508549	0.51857
1983-08-11	0.58	0.508549	0.51857
1983-08-17	0.57	0.508549	0.51857
1983-08-22	0.65	0.508549	0.51857
1983-08-25	0.61	0.508549	0.51857
1983-08-31	0.69	0.508549	0.51857
1983-09-05	0.62	0.508549	0.51857
1983-09-08	0.62	0.508549	0.51857
1983-09-14	0.78	0.508549	0.51857
1983-09-19	0.57	0.508549	0.51857
1983-09-22	0.54	0.508549	0.51857
1983-09-28	0.62	0.508549	0.51857
1983-10-03	0.65	0.508549	0.51857
1983-10-06	0.67	0.508549	0.51857
1983-10-12	0.67	0.508549	0.51857
1983-10-17	0.7	0.508549	0.51857
1983-10-20	0.75	0.508549	0.51857
1983-10-26	0.68	0.508549	0.51857
1983-10-31	0.77	0.508549	0.51857
1983-11-03	0.79	0.508549	0.51857
1983-11-09	0.94	0.508549	0.51857
1983-11-14	0.97	0.508549	0.51857
1983-11-17	1.04	0.508549	0.51857
1983-11-23	1	0.508549	0.51857
1983-11-28	0.81	0.508549	0.51857
1983-12-07	0.7	0.508549	0.51857
1983-12-12	0.78	0.508549	0.51857
1983-12-15	0.73	0.508549	0.51857
1983-12-21	0.83	0.508549	0.51857
1983-12-26	0.64	0.508549	0.51857
1983-12-29	0.8	0.508549	0.51857
1984-01-04	0.72	0.550173	0.542758
1984-01-09	0.57	0.550173	0.542758
1984-01-11	0.57	0.550173	0.542758
1984-01-18	0.97	0.550173	0.542758
1984-01-23	0.47	0.550173	0.542758
1984-01-25	0.25	0.550173	0.542758
1984-02-01	0.47	0.550173	0.542758
1984-02-06	0.48	0.550173	0.542758
1984-02-08	0.66	0.550173	0.542758
1984-02-15	0.4	0.550173	0.542758
1984-02-20	0.49	0.550173	0.542758
1984-02-22	0.46	0.550173	0.542758
1984-02-29	0.52	0.550173	0.542758
1984-03-05	0.59	0.550173	0.542758
1984-03-07	0.57	0.550173	0.542758
1984-03-14	0.64	0.550173	0.542758
1984-03-19	0.69	0.550173	0.542758
1984-03-21	0.69	0.550173	0.542758
1984-03-28	0.69	0.550173	0.542758
1984-04-02	0.52	0.550173	0.542758
1984-04-04	0.65	0.550173	0.542758
1984-04-11	0.53	0.550173	0.542758
1984-04-16	0.55	0.550173	0.542758
1984-04-18	0.56	0.550173	0.542758
1984-04-25	0.62	0.550173	0.542758
1984-04-30	0.55	0.550173	0.542758
1984-05-02	0.58	0.550173	0.542758
1984-05-09	0.55	0.550173	0.542758
1984-05-14	0.6	0.550173	0.542758
1984-05-16	0.58	0.550173	0.542758
1984-05-23	0.66	0.550173	0.542758
1984-05-28	0.44	0.550173	0.542758
1984-05-29	0.63	0.550173	0.542758
1984-06-06	0.47	0.550173	0.542758
1984-06-11	0.49	0.550173	0.542758
1984-06-13	0.49	0.550173	0.542758
1984-06-20	0.54	0.550173	0.542758
1984-06-25	0.48	0.550173	0.542758
1984-06-27	0.57	0.550173	0.542758
1984-07-04	0.52	0.550173	0.542758
1984-07-09	0.56	0.550173	0.542758
1984-07-11	0.54	0.550173	0.542758
1984-07-18	0.53	0.550173	0.542758
1984-07-23	0.5	0.550173	0.542758
1984-07-25	0.52	0.550173	0.542758
1984-08-01	0.53	0.550173	0.542758
1984-08-06	0.55	0.550173	0.542758
1984-08-08	0.55	0.550173	0.542758
1984-08-15	0.63	0.550173	0.542758
1984-08-20	0.61	0.550173	0.542758
1984-08-22	0.51	0.550173	0.542758
1984-08-29	0.58	0.550173	0.542758
1984-09-03	0.67	0.550173	0.542758
1984-09-05	0.63	0.550173	0.542758
1984-09-12	0.59	0.550173	0.542758
1984-09-17	0.5	0.550173	0.542758
1984-09-19	0.5	0.550173	0.542758
1984-09-26	0.44	0.550173	0.542758
1984-10-01	0.39	0.550173	0.542758
1984-10-03	0.4	0.550173	0.542758
1984-10-10	0.44	0.550173	0.542758
1984-10-15	0.45	0.550173	0.542758
1984-10-17	0.45	0.550173	0.542758
1984-10-24	0.55	0.550173	0.542758
1984-10-29	0.66	0.550173	0.542758
1984-10-31	0.53	0.550173	0.542758
1984-11-07	0.56	0.550173	0.542758
1984-11-14	0.61	0.550173	0.542758
1984-11-21	0.7	0.550173	0.542758
1984-11-26	0.54	0.550173	0.542758
1984-11-28	0.6	0.550173	0.542758
1984-12-05	0.53	0.550173	0.542758
1984-12-10	0.8	0.550173	0.542758
1984-12-12	0.58	0.550173	0.542758
1984-12-19	0.86	0.550173	0.542758
1984-12-24	0.56	0.550173	0.542758
1985-01-02	0.52	0.561183	0.621535
1985-01-07	0.7	0.561183	0.621535
1985-01-09	0.64	0.561183	0.621535
1985-01-16	0.67	0.561183	0.621535
1985-01-21	0.57	0.561183	0.621535
1985-01-23	0.89	0.561183	0.621535
1985-01-30	0.54	0.561183	0.621535
1985-02-04	0.45	0.561183	0.621535
1985-02-06	0.55	0.561183	0.621535
1985-02-13	0.46	0.561183	0.621535
1985-02-18	0.5	0.561183	0.621535
1985-02-20	0.44	0.561183	0.621535
1985-02-27	0.6	0.561183	0.621535
1985-03-04	0.56	0.561183	0.621535
1985-03-06	0.63	0.561183	0.621535
1985-03-13	0.58	0.561183	0.621535
1985-03-18	0.56	0.561183	0.621535
1985-03-20	0.61	0.561183	0.621535
1985-03-27	0.63	0.561183	0.621535
1985-04-01	0.5	0.561183	0.621535
1985-04-03	0.54	0.561183	0.621535
1985-04-10	0.52	0.561183	0.621535
1985-04-15	0.44	0.561183	0.621535
1985-04-17	0.5	0.561183	0.621535
1985-04-24	0.44	0.561183	0.621535
1985-04-29	0.5	0.561183	0.621535
1985-05-02	0.5	0.561183	0.621535
1985-05-08	0.48	0.561183	0.621535
1985-05-13	0.44	0.561183	0.621535
1985-05-14	0.47	0.561183	0.621535
1985-05-22	0.52	0.561183	0.621535
1985-05-27	0.46	0.561183	0.621535
1985-05-29	0.45	0.561183	0.621535
1985-06-05	0.52	0.561183	0.621535
1985-06-10	0.45	0.561183	0.621535
1985-06-12	0.71	0.561183	0.621535
1985-06-19	0.42	0.561183	0.621535
1985-06-24	0.4	0.561183	0.621535
1985-06-26	0.45	0.561183	0.621535
1985-07-03	0.42	0.561183	0.621535
1985-07-08	0.46	0.561183	0.621535
1985-07-10	0.47	0.561183	0.621535
1985-07-17	0.48	0.561183	0.621535
1985-07-22	0.5	0.561183	0.621535
1985-07-24	0.5	0.561183	0.621535
1985-07-31	0.53	0.561183	0.621535
1985-08-05	0.54	0.561183	0.621535
1985-08-07	0.57	0.561183	0.621535
1985-08-14	0.51	0.561183	0.621535
1985-08-19	0.53	0.561183	0.621535
1985-08-21	0.65	0.561183	0.621535
1985-08-28	0.55	0.561183	0.621535
1985-09-02	0.53	0.561183	0.621535
1985-09-04	0.61	0.561183	0.621535
1985-09-11	0.56	0.561183	0.621535
1985-09-16	0.62	0.561183	0.621535
1985-09-18	0.6	0.561183	0.621535
1985-09-25	0.67	0.561183	0.621535
1985-09-30	0.76	0.561183	0.621535
1985-10-02	0.72	0.561183	0.621535
1985-10-09	0.95	0.561183	0.621535
1985-10-14	0.79	0.561183	0.621535
1985-10-16	0.82	0.561183	0.621535
1985-10-23	0.97	0.561183	0.621535
1985-10-28	1.06	0.561183	0.621535
1985-10-30	0.92	0.561183	0.621535
1985-11-06	1.01	0.561183	0.621535
1985-11-11	0.62	0.561183	0.621535
1985-11-13	0.93	0.561183	0.621535
1985-11-21	0.81	0.561183	0.621535
1985-11-25	0.81	0.561183	0.621535
1985-11-27	0.86	0.561183	0.621535
1985-12-04	0.84	0.561183	0.621535
1985-12-09	0.74	0.561183	0.621535
1985-12-11	0.72	0.561183	0.621535
1985-12-23	0.68	0.561183	0.621535
1986-01-02	0.71	0.48249	0.497788
1986-01-06	0.72	0.48249	0.497788
1986-01-08	0.71	0.48249	0.497788
1986-01-15	0.75	0.48249	0.497788
1986-01-20	0.49	0.48249	0.497788
1986-01-22	0.59	0.48249	0.497788
1986-01-29	0.5	0.48249	0.497788
1986-02-03	0.48	0.48249	0.497788
1986-02-05	0.43	0.48249	0.497788
1986-02-12	0.51	0.48249	0.497788
1986-02-17	0.58	0.48249	0.497788
1986-02-19	0.6	0.48249	0.497788
1986-02-26	0.64	0.48249	0.497788
1986-03-03	0.52	0.48249	0.497788
1986-03-05	0.7	0.48249	0.497788
1986-03-12	0.73	0.48249	0.497788
1986-03-17	0.63	0.48249	0.497788
1986-03-19	0.63	0.48249	0.497788
1986-03-26	0.62	0.48249	0.497788
1986-03-31	0.42	0.48249	0.497788
1986-04-02	0.49	0.48249	0.497788
1986-04-09	0.39	0.48249	0.497788
1986-04-14	0.38	0.48249	0.497788
1986-04-16	0.37	0.48249	0.497788
1986-04-23	0.41	0.48249	0.497788
1986-04-28	0.36	0.48249	0.497788
1986-05-01	0.37	0.48249	0.497788
1986-05-06	0.38	0.48249	0.497788
1986-05-12	0.38	0.48249	0.497788
1986-05-14	0.39	0.48249	0.497788
1986-05-21	0.39	0.48249	0.497788
1986-05-26	0.38	0.48249	0.497788
1986-05-28	0.43	0.48249	0.497788
1986-06-04	0.38	0.48249	0.497788
1986-06-09	0.46	0.48249	0.497788
1986-06-11	0.39	0.48249	0.497788
1986-06-18	0.34	0.48249	0.497788
1986-06-23	0.37	0.48249	0.497788
1986-06-25	0.44	0.48249	0.497788
1986-07-02	0.37	0.48249	0.497788
1986-07-07	0.44	0.48249	0.497788
1986-07-09	0.44	0.48249	0.497788
1986-07-16	0.44	0.48249	0.497788
1986-07-21	0.43	0.48249	0.497788
1986-07-23	0.45	0.48249	0.497788
1986-07-30	0.42	0.48249	0.497788
1986-08-04	0.48	0.48249	0.497788
1986-08-06	0.49	0.48249	0.497788
1986-08-13	0.5	0.48249	0.497788
1986-08-18	0.46	0.48249	0.497788
1986-08-20	0.6	0.48249	0.497788
1986-08-27	0.51	0.48249	0.497788
1986-09-01	0.45	0.48249	0.497788
1986-09-03	0.42	0.48249	0.497788
1986-09-10	0.47	0.48249	0.497788
1986-09-15	0.57	0.48249	0.497788
1986-09-17	0.63	0.48249	0.497788
1986-09-24	0.56	0.48249	0.497788
1986-09-29	0.52	0.48249	0.497788
1986-10-01	0.63	0.48249	0.497788
1986-10-08	0.59	0.48249	0.497788
1986-10-13	0.64	0.48249	0.497788
1986-10-15	0.62	0.48249	0.497788
1986-10-22	0.78	0.48249	0.497788
1986-10-27	0.48	0.48249	0.497788
1986-10-29	0.52	0.48249	0.497788
1986-11-05	0.38	0.48249	0.497788
1986-11-10	0.49	0.48249	0.497788
1986-11-12	0.52	0.48249	0.497788
1986-11-19	0.53	0.48249	0.497788
1986-11-24	0.5	0.48249	0.497788
1986-11-26	0.52	0.48249	0.497788
1986-12-03	0.51	0.48249	0.497788
1986-12-08	0.52	0.48249	0.497788
1986-12-10	0.52	0.48249	0.497788
1986-12-17	0.6	0.48249	0.497788
1987-01-05	0.4	0.375704	0.430391
1987-01-07	0.41	0.375704	0.430391
1987-01-14	0.34	0.375704	0.430391
1987-01-19	0.45	0.375704	0.430391
1987-01-21	0.4	0.375704	0.430391
1987-01-28	0.41	0.375704	0.430391
1987-02-02	0.49	0.375704	0.430391
1987-02-04	0.51	0.375704	0.430391
1987-02-11	0.55	0.375704	0.430391
1987-02-16	0.4	0.375704	0.430391
1987-02-18	0.43	0.375704	0.430391
1987-02-25	0.42	0.375704	0.430391
1987-03-02	0.46	0.375704	0.430391
1987-03-04	0.71	0.375704	0.430391
1987-03-11	0.33	0.375704	0.430391
1987-03-16	0.44	0.375704	0.430391
1987-03-18	0.41	0.375704	0.430391
1987-03-25	0.47	0.375704	0.430391
1987-03-30	0.33	0.375704	0.430391
1987-04-01	0.34	0.375704	0.430391
1987-04-08	0.33	0.375704	0.430391
1987-04-13	0.62	0.375704	0.430391
1987-04-15	0.33	0.375704	0.430391
1987-04-22	0.34	0.375704	0.430391
1987-04-27	0.31	0.375704	0.430391
1987-04-28	0.29	0.375704	0.430391
1987-05-06	0.33	0.375704	0.430391
1987-05-11	0.34	0.375704	0.430391
1987-05-13	0.42	0.375704	0.430391
1987-05-20	0.31	0.375704	0.430391
1987-05-25	0.3	0.375704	0.430391
1987-05-26	0.33	0.375704	0.430391
1987-06-03	0.35	0.375704	0.430391
1987-06-08	0.32	0.375704	0.430391
1987-06-10	0.29	0.375704	0.430391
1987-06-17	0.35	0.375704	0.430391
1987-06-22	0.3	0.375704	0.430391
1987-06-24	0.29	0.375704	0.430391
1987-07-01	0.3	0.375704	0.430391
1987-07-06	0.3	0.375704	0.430391
1987-07-08	0.28	0.375704	0.430391
1987-07-15	0.26	0.375704	0.430391
1987-07-20	0.26	0.375704	0.430391
1987-07-22	0.35	0.375704	0.430391
1987-07-29	0.26	0.375704	0.430391
1987-08-03	0.26	0.375704	0.430391
1987-08-05	0.27	0.375704	0.430391
1987-08-12	0.33	0.375704	0.430391
1987-08-17	0.3	0.375704	0.430391
1987-08-19	0.32	0.375704	0.430391
1987-08-26	0.32	0.375704	0.430391
1987-08-31	0.37	0.375704	0.430391
1987-09-02	0.3	0.375704	0.430391
1987-09-09	0.34	0.375704	0.430391
1987-09-14	0.34	0.375704	0.430391
1987-09-16	0.39	0.375704	0.430391
1987-09-23	0.44	0.375704	0.430391
1987-09-28	0.69	0.375704	0.430391
1987-09-30	0.46	0.375704	0.430391
1987-10-07	0.48	0.375704	0.430391
1987-10-12	0.39	0.375704	0.430391
1987-10-14	0.47	0.375704	0.430391
1987-10-21	0.4	0.375704	0.430391
1987-10-26	0.35	0.375704	0.430391
1987-10-28	0.42	0.375704	0.430391
1987-11-04	0.42	0.375704	0.430391
1987-11-09	0.38	0.375704	0.430391
1987-11-11	0.44	0.375704	0.430391
1987-11-18	0.42	0.375704	0.430391
1987-11-23	0.32	0.375704	0.430391
1987-11-25	0.38	0.375704	0.430391
1987-12-02	0.33	0.375704	0.430391
1987-12-07	0.36	0.375704	0.430391
1987-12-09	0.38	0.375704	0.430391
1987-12-16	0.39	0.375704	0.430391
1987-12-21	0.33	0.375704	0.430391
1987-12-23	0.63	0.375704	0.430391
1987-12-30	0.29	0.375704	0.430391
1988-01-13	0.3	0.325068	0.416267
1988-01-27	0.42	0.325068	0.416267
1988-02-10	0.35	0.325068	0.416267
1988-02-24	0.28	0.325068	0.416267
1988-03-09	0.32	0.325068	0.416267
1988-04-06	0.25	0.325068	0.416267
1988-04-20	0.26	0.325068	0.416267
1988-05-03	0.29	0.325068	0.416267
1988-05-18	0.27	0.325068	0.416267
1988-06-01	0.31	0.325068	0.416267
1988-06-29	0.44	0.325068	0.416267
1988-07-13	0.31	0.325068	0.416267
1988-07-27	0.34	0.325068	0.416267
1988-08-10	0.34	0.325068	0.416267
1988-08-24	0.39	0.325068	0.416267
1988-09-07	0.41	0.325068	0.416267
1988-09-21	0.37	0.325068	0.416267
1988-10-05	0.43	0.325068	0.416267
1988-10-19	0.34	0.325068	0.416267
1988-11-02	0.37	0.325068	0.416267
1988-11-16	0.42	0.325068	0.416267
1988-11-30	0.46	0.325068	0.416267
1988-12-14	0.31	0.325068	0.416267
1988-12-28	0.25	0.325068	0.416267
1989-01-11	0.34	0.328233	0.523662
1989-01-26	0.24	0.328233	0.523662
1989-02-08	0.39	0.328233	0.523662
1989-02-22	0.4	0.328233	0.523662
1989-03-08	0.36	0.328233	0.523662
1989-03-22	0.29	0.328233	0.523662
1989-03-27	0.14	0.328233	0.523662
1989-04-04	0.32	0.328233	0.523662
1989-04-10	0.23	0.328233	0.523662
1989-04-19	0.29	0.328233	0.523662
1989-04-24	0.33	0.328233	0.523662
1989-05-02	0.3	0.328233	0.523662
1989-05-08	0.25	0.328233	0.523662
1989-05-17	0.29	0.328233	0.523662
1989-05-22	0.27	0.328233	0.523662
1989-05-31	0.3	0.328233	0.523662
1989-06-05	0.28	0.328233	0.523662
1989-06-14	#N/A	0.328233	0.523662
1989-06-19	0.32	0.328233	0.523662
1989-06-28	0.39	0.328233	0.523662
1989-07-03	0.33	0.328233	0.523662
1989-07-12	0.38	0.328233	0.523662
1989-07-17	0.36	0.328233	0.523662
1989-07-26	0.32	0.328233	0.523662
1989-07-31	0.69	0.328233	0.523662
1989-08-09	0.33	0.328233	0.523662
1989-08-14	0.24	0.328233	0.523662
1989-08-23	0.28	0.328233	0.523662
1989-08-28	0.31	0.328233	0.523662
1989-09-06	0.28	0.328233	0.523662
1989-09-11	0.31	0.328233	0.523662
1989-09-20	0.39	0.328233	0.523662
1989-09-25	0.35	0.328233	0.523662
1989-10-04	0.4	0.328233	0.523662
1989-10-18	0.33	0.328233	0.523662
1989-10-23	0.37	0.328233	0.523662
1989-11-01	0.42	0.328233	0.523662
1989-11-15	0.36	0.328233	0.523662
1989-11-20	0.32	0.328233	0.523662
1989-11-29	0.38	0.328233	0.523662
1989-12-04	0.38	0.328233	0.523662
1989-12-13	0.43	0.328233	0.523662
1989-12-18	0.45	0.328233	0.523662
1989-12-27	0.36	0.328233	0.523662
1990-01-10	0.33	0.291424	0.480341
1990-01-24	0.43	0.291424	0.480341
1990-02-07	0.29	0.291424	0.480341
1990-02-21	0.32	0.291424	0.480341
1990-03-07	0.26	0.291424	0.480341
1990-03-21	0.26	0.291424	0.480341
1990-04-04	0.25	0.291424	0.480341
1990-04-18	0.26	0.291424	0.480341
1990-05-02	0.26	0.291424	0.480341
1990-05-16	0.32	0.291424	0.480341
1990-05-30	0.31	0.291424	0.480341
1990-06-13	0.32	0.291424	0.480341
1990-06-27	0.27	0.291424	0.480341
1990-07-11	0.27	0.291424	0.480341
1990-07-25	0.24	0.291424	0.480341
1990-08-08	0.27	0.291424	0.480341
1990-08-22	0.31	0.291424	0.480341
1990-09-05	0.34	0.291424	0.480341
1990-09-19	0.34	0.291424	0.480341
1990-10-03	0.29	0.291424	0.480341
1990-10-17	0.3	0.291424	0.480341
1990-10-31	0.34	0.291424	0.480341
1990-11-14	0.24	0.291424	0.480341
1990-11-28	0.28	0.291424	0.480341
1990-12-12	0.28	0.291424	0.480341
1991-01-09	0.24	0.258809	0.521416
1991-01-23	0.2	0.258809	0.521416
1991-02-20	0.19	0.258809	0.521416
1991-03-06	0.24	0.258809	0.521416
1991-03-20	0.24	0.258809	0.521416
1991-04-03	0.27	0.258809	0.521416
1991-04-17	0.2	0.258809	0.521416
1991-05-01	0.25	0.258809	0.521416
1991-05-15	0.37	0.258809	0.521416
1991-05-29	0.24	0.258809	0.521416
1991-06-12	0.36	0.258809	0.521416
1991-06-26	0.22	0.258809	0.521416
1991-07-10	0.18	0.258809	0.521416
1991-08-07	0.25	0.258809	0.521416
1991-08-21	0.26	0.258809	0.521416
1991-09-04	0.21	0.258809	0.521416
1991-09-18	0.4	0.258809	0.521416
1991-10-02	0.27	0.258809	0.521416
1991-10-16	0.24	0.258809	0.521416
1991-10-30	0.46	0.258809	0.521416
1991-11-13	0.33	0.258809	0.521416
1991-11-27	0.22	0.258809	0.521416
1991-12-11	0.31	0.258809	0.521416
1991-12-17	0.33	0.258809	0.521416
1992-01-08	0.2	0.234263	0.433579
1992-01-22	0.25	0.234263	0.433579
1992-02-05	0.27	0.234263	0.433579
1992-02-19	0.2	0.234263	0.433579
1992-03-04	0.21	0.234263	0.433579
1992-03-18	0.28	0.234263	0.433579
1992-04-01	0.2	0.234263	0.433579
1992-04-15	0.17	0.234263	0.433579
1992-04-28	0.22	0.234263	0.433579
1992-05-13	0.18	0.234263	0.433579
1992-05-27	0.19	0.234263	0.433579
1992-06-10	0.23	0.234263	0.433579
1992-06-24	0.23	0.234263	0.433579
1992-07-08	0.22	0.234263	0.433579
1992-07-22	0.18	0.234263	0.433579
1992-08-05	0.32	0.234263	0.433579
1992-08-19	0.38	0.234263	0.433579
1992-09-02	0.25	0.234263	0.433579
1992-09-16	0.22	0.234263	0.433579
1992-09-30	0.26	0.234263	0.433579
1992-10-14	0.3	0.234263	0.433579
1992-10-28	0.33	0.234263	0.433579
1992-11-11	0.24	0.234263	0.433579
1992-12-02	0.25	0.234263	0.433579
1992-12-09	0.23	0.234263	0.433579
1992-12-15	0.23	0.234263	0.433579
1993-01-06	0.25	0.259098	0.420179
1993-01-20	0.3	0.259098	0.420179
1993-02-03	0.18	0.259098	0.420179
1993-02-17	0.2	0.259098	0.420179
1993-03-03	0.24	0.259098	0.420179
1993-03-17	0.21	0.259098	0.420179
1993-03-31	0.23	0.259098	0.420179
1993-04-14	0.19	0.259098	0.420179
1993-04-28	0.2	0.259098	0.420179
1993-05-12	0.21	0.259098	0.420179
1993-05-26	0.22	0.259098	0.420179
1993-06-09	0.23	0.259098	0.420179
1993-06-23	0.2	0.259098	0.420179
1993-07-07	0.18	0.259098	0.420179
1993-07-21	0.27	0.259098	0.420179
1993-08-04	0.2	0.259098	0.420179
1993-08-18	0.15	0.259098	0.420179
1993-09-01	0.24	0.259098	0.420179
1993-09-15	0.27	0.259098	0.420179
1993-09-29	0.21	0.259098	0.420179
1993-10-13	0.21	0.259098	0.420179
1993-10-27	0.17	0.259098	0.420179
1993-11-10	0.18	0.259098	0.420179
1993-11-24	0.16	0.259098	0.420179
1993-12-08	0.16	0.259098	0.420179
1993-12-22	0.58	0.259098	0.420179
1994-01-05	0.27	0.223099	0.336188
1994-02-02	0.2	0.223099	0.336188
1994-02-16	0.16	0.223099	0.336188
1994-03-02	0.26	0.223099	0.336188
1994-03-16	0.32	0.223099	0.336188
1994-03-30	0.17	0.223099	0.336188
1994-04-13	0.17	0.223099	0.336188
1994-04-27	0.36	0.223099	0.336188
1994-05-11	0.23	0.223099	0.336188
1994-05-25	0.44	0.223099	0.336188
1994-06-08	0.18	0.223099	0.336188
1994-06-22	0.1	0.223099	0.336188
1994-07-06	0.21	0.223099	0.336188
1994-07-20	0.14	0.223099	0.336188
1994-08-03	0.24	0.223099	0.336188
1994-08-17	0.14	0.223099	0.336188
1994-08-31	0.19	0.223099	0.336188
1994-09-14	0.26	0.223099	0.336188
1994-09-28	0.15	0.223099	0.336188
1994-10-12	0.15	0.223099	0.336188
1994-10-26	0.18	0.223099	0.336188
1994-11-09	0.19	0.223099	0.336188
1994-11-23	0.21	0.223099	0.336188
1994-12-07	0.2	0.223099	0.336188
1994-12-21	0.14	0.223099	0.336188
1995-01-04	0.3	0.208137	0.309608
1995-01-18	0.26	0.208137	0.309608
1995-02-01	0.32	0.208137	0.309608
1995-02-15	0.21	0.208137	0.309608
1995-03-01	0.17	0.208137	0.309608
1995-03-15	0.11	0.208137	0.309608
1995-03-29	0.1	0.208137	0.309608
1995-04-12	0.11	0.208137	0.309608
1995-04-26	0.16	0.208137	0.309608
1995-05-10	0.11	0.208137	0.309608
1995-05-24	0.14	0.208137	0.309608
1995-06-07	0.18	0.208137	0.309608
1995-06-21	0.15	0.208137	0.309608
1995-07-05	0.17	0.208137	0.309608
1995-07-19	0.15	0.208137	0.309608
1995-08-02	0.21	0.208137	0.309608
1995-08-16	0.46	0.208137	0.309608
1995-08-30	0.19	0.208137	0.309608
1995-09-13	0.19	0.208137	0.309608
1995-09-27	0.16	0.208137	0.309608
1995-10-11	0.19	0.208137	0.309608
1995-10-25	0.19	0.208137	0.309608
1995-11-08	0.23	0.208137	0.309608
1995-11-22	0.28	0.208137	0.309608
1995-12-06	0.22	0.208137	0.309608
1995-12-20	0.23	0.208137	0.309608
1996-01-03	0.23	0.22124	0.429879
1996-01-17	0.19	0.22124	0.429879
1996-01-31	0.17	0.22124	0.429879
1996-02-14	0.26	0.22124	0.429879
1996-02-28	0.24	0.22124	0.429879
1996-03-13	0.22	0.22124	0.429879
1996-03-27	0.18	0.22124	0.429879
1996-04-10	0.15	0.22124	0.429879
1996-04-24	0.2	0.22124	0.429879
1996-05-08	0.21	0.22124	0.429879
1996-05-22	0.2	0.22124	0.429879
1996-06-05	0.2	0.22124	0.429879
1996-06-19	0.2	0.22124	0.429879
1996-07-03	0.22	0.22124	0.429879
1996-07-17	0.21	0.22124	0.429879
1996-07-31	0.18	0.22124	0.429879
1996-08-14	0.2	0.22124	0.429879
1996-08-28	0.17	0.22124	0.429879
1996-09-11	0.23	0.22124	0.429879
1996-09-25	0.51	0.22124	0.429879
1996-10-09	0.21	0.22124	0.429879
1996-10-23	0.23	0.22124	0.429879
1996-11-06	0.17	0.22124	0.429879
1996-11-20	0.25	0.22124	0.429879
1996-12-04	0.31	0.22124	0.429879
1996-12-18	0.13	0.22124	0.429879
1996-12-30	0.25	0.22124	0.429879
1997-01-29	0.46	0.21266	0.381993
1997-02-12	0.26	0.21266	0.381993
1997-02-26	0.28	0.21266	0.381993
1997-03-12	0.22	0.21266	0.381993
1997-03-26	0.11	0.21266	0.381993
1997-04-09	0.27	0.21266	0.381993
1997-04-23	0.18	0.21266	0.381993
1997-05-06	0.15	0.21266	0.381993
1997-05-21	0.17	0.21266	0.381993
1997-06-04	0.11	0.21266	0.381993
1997-06-18	0.27	0.21266	0.381993
1997-07-02	0.24	0.21266	0.381993
1997-07-16	0.12	0.21266	0.381993
1997-07-30	0.15	0.21266	0.381993
1997-08-13	0.13	0.21266	0.381993
1997-08-27	0.17	0.21266	0.381993
1997-09-10	0.17	0.21266	0.381993
1997-09-24	0.15	0.21266	0.381993
1997-10-08	0.2	0.21266	0.381993
1997-10-22	0.16	0.21266	0.381993
1997-11-05	0.23	0.21266	0.381993
1997-11-19	0.22	0.21266	0.381993
1997-12-03	0.22	0.21266	0.381993
1997-12-17	0.31	0.21266	0.381993
1998-01-14	0.22	0.24755	0.328218
1998-01-28	0.2	0.24755	0.328218
1998-02-11	0.16	0.24755	0.328218
1998-02-25	0.14	0.24755	0.328218
1998-03-11	0.24	0.24755	0.328218
1998-03-25	0.26	0.24755	0.328218
1998-04-08	0.17	0.24755	0.328218
1998-04-22	0.26	0.24755	0.328218
1998-05-06	0.15	0.24755	0.328218
1998-05-18	0.19	0.24755	0.328218
1998-06-03	0.31	0.24755	0.328218
1998-06-17	0.24	0.24755	0.328218
1998-07-01	0.2	0.24755	0.328218
1998-07-15	0.17	0.24755	0.328218
1998-07-29	0.19	0.24755	0.328218
1998-08-12	0.17	0.24755	0.328218
1998-08-26	0.27	0.24755	0.328218
1998-09-09	0.21	0.24755	0.328218
1998-09-23	0.2	0.24755	0.328218
1998-10-07	0.18	0.24755	0.328218
1998-10-21	0.2	0.24755	0.328218
1998-11-04	0.45	0.24755	0.328218
1998-11-18	0.22	0.24755	0.328218
1998-12-02	0.16	0.24755	0.328218
1998-12-16	0.31	0.24755	0.328218
1998-12-28	0.14	0.24755	0.328218
1999-01-13	0.2	0.211879	0.2979
1999-01-27	0.18	0.211879	0.2979
1999-02-10	0.18	0.211879	0.2979
1999-02-24	0.47	0.211879	0.2979
1999-03-10	0.17	0.211879	0.2979
1999-03-24	0.11	0.211879	0.2979
1999-04-07	0.12	0.211879	0.2979
1999-04-21	0.11	0.211879	0.2979
1999-05-03	0.12	0.211879	0.2979
1999-05-19	0.21	0.211879	0.2979
1999-06-02	0.13	0.211879	0.2979
1999-06-16	0.12	0.211879	0.2979
1999-06-30	0.12	0.211879	0.2979
1999-07-14	0.15	0.211879	0.2979
1999-07-28	0.13	0.211879	0.2979
1999-08-11	0.17	0.211879	0.2979
1999-08-25	0.11	0.211879	0.2979
1999-09-08	0.12	0.211879	0.2979
1999-09-22	0.16	0.211879	0.2979
1999-10-06	0.16	0.211879	0.2979
1999-10-20	0.14	0.211879	0.2979
1999-11-03	0.14	0.211879	0.2979
1999-11-17	0.12	0.211879	0.2979
1999-12-01	0.14	0.211879	0.2979
1999-12-15	0.48	0.211879	0.2979
1999-12-29	0.38	0.211879	0.2979
2000-01-12	0.25	0.179028	0.272467
2000-01-26	0.15	0.179028	0.272467
2000-02-09	0.39	0.179028	0.272467
2000-02-23	0.14	0.179028	0.272467
2000-03-08	0.19	0.179028	0.272467
2000-03-22	0.14	0.179028	0.272467
2000-04-05	0.18	0.179028	0.272467
2000-04-19	0.14	0.179028	0.272467
2000-05-03	0.14	0.179028	0.272467
2000-05-17	0.13	0.179028	0.272467
2000-05-31	0.15	0.179028	0.272467
2000-06-14	0.12	0.179028	0.272467
2000-06-28	0.12	0.179028	0.272467
2000-07-12	0.15	0.179028	0.272467
2000-07-26	0.25	0.179028	0.272467
2000-08-09	0.21	0.179028	0.272467
2000-08-23	0.14	0.179028	0.272467
2000-09-06	0.17	0.179028	0.272467
2000-09-20	0.18	0.179028	0.272467
2000-10-04	0.2	0.179028	0.272467
2000-10-18	0.19	0.179028	0.272467
2000-11-01	0.17	0.179028	0.272467
2000-11-15	0.16	0.179028	0.272467
2000-11-29	0.18	0.179028	0.272467
2000-12-13	0.19	0.179028	0.272467
2000-12-27	0.16	0.179028	0.272467
2001-01-10	0.14	0.107664	#N/A
2001-01-24	0.1	0.107664	#N/A
2001-02-07	0.17	0.107664	#N/A
2001-02-21	0.14	0.107664	#N/A
2001-03-07	0.11	0.107664	#N/A
2001-03-21	0.13	0.107664	#N/A
2001-04-04	0.07	0.107664	#N/A
2001-04-18	0.07	0.107664	#N/A
2001-05-02	0.12	0.107664	#N/A
2001-05-16	0.07	0.107664	#N/A
2001-05-30	0.05	0.107664	#N/A
2001-06-13	0.09	0.107664	#N/A
2001-06-27	0.07	0.107664	#N/A
2001-07-11	0.1	0.107664	#N/A
2001-07-25	0.11	0.107664	#N/A
2001-08-08	0.14	0.107664	#N/A
2001-08-22	0.1	0.107664	#N/A
2001-09-05	0.13	0.107664	#N/A
2001-09-19	0.1	0.107664	#N/A
2001-10-03	0.09	0.107664	#N/A
2001-10-17	0.09	0.107664	#N/A
2001-10-31	0.11	0.107664	#N/A
2001-11-14	0.11	0.107664	#N/A
2001-11-28	0.15	0.107664	#N/A
2001-12-12	0.1	0.107664	#N/A
2001-12-27	0.1	0.107664	#N/A
2002-01-09	0.17	0.218866	#N/A
2002-01-23	0.3	0.218866	#N/A
2002-02-06	0.31	0.218866	#N/A
2002-02-20	0.22	0.218866	#N/A
2002-03-06	0.2	0.218866	#N/A
2002-03-20	0.16	0.218866	#N/A
2002-04-03	0.18	0.218866	#N/A
2002-04-17	0.19	0.218866	#N/A
2002-05-01	0.15	0.218866	#N/A
2002-05-15	0.29	0.218866	#N/A
2002-05-29	0.15	0.218866	#N/A
2002-06-12	0.14	0.218866	#N/A
2002-06-26	0.36	0.218866	#N/A
2002-07-10	0.53	0.218866	#N/A
2002-07-24	0.19	0.218866	#N/A
2002-08-07	0.21	0.218866	#N/A
2002-08-21	0.16	0.218866	#N/A
2002-09-04	0.15	0.218866	#N/A
2002-09-18	0.15	0.218866	#N/A
2002-10-02	0.39	0.218866	#N/A
2002-10-16	0.11	0.218866	#N/A
2002-10-30	0.33	0.218866	#N/A
2002-11-13	0.21	0.218866	#N/A
2002-11-27	0.13	0.218866	#N/A
2002-12-11	0.15	0.218866	#N/A
2002-12-23	0.18	0.218866	#N/A
2003-01-08	0.35	0.255816	#N/A
2003-01-22	0.16	0.255816	#N/A
2003-02-05	0.17	0.255816	#N/A
2003-02-19	0.13	0.255816	#N/A
2003-03-05	1.1	0.255816	#N/A
2003-03-19	0.33	0.255816	#N/A
2003-04-02	0.1	0.255816	#N/A
2003-04-16	0.16	0.255816	#N/A
2003-04-28	0.05	0.255816	#N/A
2003-05-14	0.16	0.255816	#N/A
2003-05-26	0.17	0.255816	#N/A
2003-06-11	0.2	0.255816	#N/A
2003-06-25	0.15	0.255816	#N/A
2003-07-09	0.29	0.255816	#N/A
2003-07-23	0.19	0.255816	#N/A
2003-08-06	0.18	0.255816	#N/A
2003-08-20	0.2	0.255816	#N/A
2003-09-03	0.18	0.255816	#N/A
2003-09-17	0.17	0.255816	#N/A
2003-10-01	0.17	0.255816	#N/A
2003-10-15	0.2	0.255816	#N/A
2003-10-29	0.11	0.255816	#N/A
2003-11-12	0.15	0.255816	#N/A
2003-11-26	0.11	0.255816	#N/A
2003-12-10	0.12	0.255816	#N/A
2003-12-22	0.44	0.255816	#N/A
2004-01-07	0.17	0.219809	#N/A
2004-01-21	0.26	0.219809	#N/A
2004-02-04	0.34	0.219809	#N/A
2004-02-18	0.22	0.219809	#N/A
2004-03-03	0.15	0.219809	#N/A
2004-03-17	0.1	0.219809	#N/A
2004-03-31	0.15	0.219809	#N/A
2004-04-14	0.13	0.219809	#N/A
2004-04-28	0.1	0.219809	#N/A
2004-05-12	0.15	0.219809	#N/A
2004-05-26	0.14	0.219809	#N/A
2004-06-09	0.16	0.219809	#N/A
2004-06-23	0.1	0.219809	#N/A
2004-07-07	0.08	0.219809	#N/A
2004-07-21	0.18	0.219809	#N/A
2004-08-04	0.15	0.219809	#N/A
2004-08-18	1.3	0.219809	#N/A
2004-09-01	0.42	0.219809	#N/A
2004-09-15	0.06	0.219809	#N/A
2004-09-29	0.33	0.219809	#N/A
2004-10-13	0.14	0.219809	#N/A
2004-10-27	0.1	0.219809	#N/A
2004-11-10	0.11	0.219809	#N/A
2004-11-24	0.17	0.219809	#N/A
2004-12-08	0.16	0.219809	#N/A
2004-12-22	0.2	0.219809	#N/A
2005-01-05	0.2	0.133434	#N/A
2005-01-19	0.12	0.133434	#N/A
2005-02-02	0.16	0.133434	#N/A
2005-02-16	0.11	0.133434	#N/A
2005-03-02	0.11	0.133434	#N/A
2005-03-16	0.11	0.133434	#N/A
2005-03-30	0.11	0.133434	#N/A
2005-04-13	0.07	0.133434	#N/A
2005-04-27	0.11	0.133434	#N/A
2005-05-11	0.08	0.133434	#N/A
2005-05-25	0.11	0.133434	#N/A
2005-06-08	0.05	0.133434	#N/A
2005-06-22	0.1	0.133434	#N/A
2005-07-06	0.14	0.133434	#N/A
2005-07-20	0.29	0.133434	#N/A
2005-08-03	0.14	0.133434	#N/A
2005-08-17	0.15	0.133434	#N/A
2005-08-31	0.12	0.133434	#N/A
2005-09-14	0.14	0.133434	#N/A
2005-09-28	0.33	0.133434	#N/A
2005-10-12	0.18	0.133434	#N/A
2005-10-26	0.26	0.133434	#N/A
2005-11-09	0.13	0.133434	#N/A
2005-11-22	0.14	0.133434	#N/A
2005-12-07	0.15	0.133434	#N/A
2005-12-21	0.17	0.133434	#N/A
2006-01-04	0.14	0.117662	#N/A
2006-01-18	0.12	0.117662	#N/A
2006-02-01	0.05	0.117662	#N/A
2006-02-15	0.19	0.117662	#N/A
2006-03-01	0.13	0.117662	#N/A
2006-03-15	0.13	0.117662	#N/A
2006-03-29	0.1	0.117662	#N/A
2006-04-12	0.07	0.117662	#N/A
2006-04-26	0.1	0.117662	#N/A
2006-05-10	0.05	0.117662	#N/A
2006-05-23	0.11	0.117662	#N/A
2006-06-07	0.12	0.117662	#N/A
2006-06-21	0.11	0.117662	#N/A
2006-07-05	0.11	0.117662	#N/A
2006-07-19	0.06	0.117662	#N/A
2006-08-02	0.14	0.117662	#N/A
2006-08-16	0.13	0.117662	#N/A
2006-08-30	0.13	0.117662	#N/A
2006-09-13	0.12	0.117662	#N/A
2006-09-27	0.19	0.117662	#N/A
2006-10-11	0.11	0.117662	#N/A
2006-10-25	0.12	0.117662	#N/A
2006-11-08	0.14	0.117662	#N/A
2006-11-22	0.12	0.117662	#N/A
2006-12-06	0.16	0.117662	#N/A
2006-12-20	0.19	0.117662	#N/A
2007-01-03	0.11	0.119431	#N/A
2007-01-17	0.13	0.119431	#N/A
2007-01-31	0.11	0.119431	#N/A
2007-02-14	0.15	0.119431	#N/A
2007-02-28	0.16	0.119431	#N/A
2007-03-14	0.09	0.119431	#N/A
2007-03-28	0.1	0.119431	#N/A
2007-04-11	0.08	0.119431	#N/A
2007-04-25	0.05	0.119431	#N/A
2007-05-09	0.07	0.119431	#N/A
2007-05-23	0.13	0.119431	#N/A
2007-06-06	0.21	0.119431	#N/A
2007-06-20	0.22	0.119431	#N/A
2007-07-04	0.12	0.119431	#N/A
2007-07-18	0.1	0.119431	#N/A
2007-08-01	0.2	0.119431	#N/A
2007-08-15	0.05	0.119431	#N/A
2007-08-29	0.13	0.119431	#N/A
2007-09-12	0.06	0.119431	#N/A
2007-09-26	0.07	0.119431	#N/A
2007-10-10	0.18	0.119431	#N/A
2007-10-24	0.05	0.119431	#N/A
2007-11-07	0.07	0.119431	#N/A
2007-11-21	0.17	0.119431	#N/A
2007-12-05	0.14	0.119431	#N/A
2007-12-19	0.1	0.119431	#N/A
2008-01-02	0.09	0.157229	#N/A
2008-01-16	0.18	0.157229	#N/A
2008-01-30	0.05	0.157229	#N/A
2008-02-13	0.26	0.157229	#N/A
2008-02-27	0.07	0.157229	#N/A
2008-03-12	0.1	0.157229	#N/A
2008-03-26	0.14	0.157229	#N/A
2008-04-09	0.13	0.157229	#N/A
2008-04-23	0.4	0.157229	#N/A
2008-05-07	0.37	0.157229	#N/A
2008-05-21	0.29	0.157229	#N/A
2008-06-04	0.09	0.157229	#N/A
2008-06-18	0.12	0.157229	#N/A
2008-07-02	0.17	0.157229	#N/A
2008-07-16	0.12	0.157229	#N/A
2008-07-30	0.17	0.157229	#N/A
2008-08-13	0.23	0.157229	#N/A
2008-08-27	0.1	0.157229	#N/A
2008-09-10	0.1	0.157229	#N/A
2008-09-24	0.12	0.157229	#N/A
2008-10-08	0.12	0.157229	#N/A
2008-10-22	0.14	0.157229	#N/A
2008-11-05	0.08	0.157229	#N/A
2008-11-19	0.06	0.157229	#N/A
2008-12-03	0.18	0.157229	#N/A
2008-12-17	0.09	0.157229	#N/A
2008-12-30	0.07	0.157229	#N/A
2009-01-14	0.07	0.132852	#N/A
2009-01-28	0.08	0.132852	#N/A
2009-02-11	0.06	0.132852	#N/A
2009-02-25	0.08	0.132852	#N/A
2009-03-11	0.11	0.132852	#N/A
2009-03-25	0.05	0.132852	#N/A
2009-04-08	0.05	0.132852	#N/A
2009-04-22	0.17	0.132852	#N/A
2009-05-06	0.05	0.132852	#N/A
2009-05-20	0.21	0.132852	#N/A
2009-06-03	0.12	0.132852	#N/A
2009-06-17	0.1	0.132852	#N/A
2009-07-01	0.17	0.132852	#N/A
2009-07-15	0.13	0.132852	#N/A
2009-07-29	0.17	0.132852	#N/A
2009-08-12	0.05	0.132852	#N/A
2009-08-26	0.05	0.132852	#N/A
2009-09-09	0.13	0.132852	#N/A
2009-09-23	0.45	0.132852	#N/A
2009-10-07	0.11	0.132852	#N/A
2009-10-21	0.17	0.132852	#N/A
2009-11-04	0.3	0.132852	#N/A
2009-11-18	0.37	0.132852	#N/A
2009-12-02	0.3	0.132852	#N/A
2009-12-16	0.1	0.132852	#N/A
2009-12-30	0.12	0.132852	#N/A
2010-01-13	0.09	0.134179	#N/A
2010-01-27	0.11	0.134179	#N/A
2010-02-10	0.15	0.134179	#N/A
2010-02-24	0.13	0.134179	#N/A
2010-03-10	0.14	0.134179	#N/A
2010-03-24	0.29	0.134179	#N/A
2010-04-07	0.1	0.134179	#N/A
2010-04-21	0.06	0.134179	#N/A
2010-05-06	0.47	0.134179	#N/A
2010-05-19	0.14	0.134179	#N/A
2010-06-02	0.09	0.134179	#N/A
2010-06-16	0.1	0.134179	#N/A
2010-06-30	0.08	0.134179	#N/A
2010-07-14	0.46	0.134179	#N/A
2010-07-28	0.44	0.134179	#N/A
2010-08-11	0.1	0.134179	#N/A
2010-08-25	0.08	0.134179	#N/A
2010-09-08	0.07	0.134179	#N/A
2010-09-22	0.09	0.134179	#N/A
2010-10-06	0.07	0.134179	#N/A
2010-10-20	0.05	0.134179	#N/A
2010-11-03	0.09	0.134179	#N/A
2010-11-17	0.1	0.134179	#N/A
2010-12-01	0.07	0.134179	#N/A
2010-12-15	0.1	0.134179	#N/A
2010-12-29	0.07	0.134179	#N/A
2011-01-12	0.214	0.104783	#N/A
2011-01-26	0.085	0.104783	#N/A
2011-02-09	0.081	0.104783	#N/A
2011-02-23	0.086	0.104783	#N/A
2011-03-09	0.067	0.104783	#N/A
2011-03-23	0.053	0.104783	#N/A
2011-04-06	0.061	0.104783	#N/A
2011-04-20	0.042	0.104783	#N/A
2011-05-03	0.046	0.104783	#N/A
2011-05-18	0.046	0.104783	#N/A
2011-05-31	0.047	0.104783	#N/A
2011-06-15	0.064	0.104783	#N/A
2011-06-29	0.081	0.104783	#N/A
2011-07-13	0.043	0.104783	#N/A
2011-07-27	0.108	0.104783	#N/A
2011-08-10	0.1	0.104783	#N/A
2011-08-24	0.093	0.104783	#N/A
2011-09-07	0.098	0.104783	#N/A
2011-09-21	0.093	0.104783	#N/A
2011-10-05	0.084	0.104783	#N/A
2011-10-19	0.083	0.104783	#N/A
2011-11-02	0.104	0.104783	#N/A
2011-11-16	0.083	0.104783	#N/A
2011-11-30	0.084	0.104783	#N/A
2011-12-14	0.132	0.104783	#N/A
2011-12-28	0.097	0.104783	#N/A
2012-01-11	0.149	0.108789	#N/A
2012-01-25	0.108	0.108789	#N/A
2012-02-08	0.083	0.108789	#N/A
2012-02-22	0.075	0.108789	#N/A
2012-03-07	0.071	0.108789	#N/A
2012-03-21	0.05	0.108789	#N/A
2012-04-04	0.04	0.108789	#N/A
2012-04-18	0.04	0.108789	#N/A
2012-05-02	0.05	0.108789	#N/A
2012-05-15	0.06	0.108789	#N/A
2012-05-30	0.06	0.108789	#N/A
2012-06-13	0.09	0.108789	#N/A
2012-06-27	0.09	0.108789	#N/A
2012-07-11	0.1	0.108789	#N/A
2012-07-25	0.09	0.108789	#N/A
2012-08-08	0.09	0.108789	#N/A
2012-08-22	0.1	0.108789	#N/A
2012-09-05	0.11	0.108789	#N/A
2012-09-19	0.08	0.108789	#N/A
2012-10-03	0.08	0.108789	#N/A
2012-10-17	0.2	0.108789	#N/A
2012-10-31	0.1	0.108789	#N/A
2012-11-14	0.1	0.108789	#N/A
2012-11-28	0.1	0.108789	#N/A
2012-12-12	0.11	0.108789	#N/A
2012-12-27	0.2	0.108789	#N/A

[truncated: 13 more sheets: figure 7EF, figure 7G, figure 7HI, figure 8AB, figure 8CD, figure 8EF, figure 9A, figure 9 B, figure 9C, figure 9D, figure 9E, figure 9F, figure 10]
