# Supplementary material for: Coupling global models for hydrology and nutrient loading to simulate nitrogen and phosphorus retention in surface water – description of IMAGE–GNM and analysis of performance
Source: Copernicus journal article supplement (doi:10.5194/gmd-8-4045-2015), 2015-12-21
Supplement: Supplementary file [file gmd-8-4045-2015-supplement-title-page.pdf › gmd-8-4045-2015-supplement-title-page.pdf]

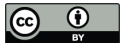

## *Supplement of*

# **Coupling global models for hydrology and nutrient loading to simulate nitrogen and phosphorus retention in surface water – description of IMAGE–GNM and analysis of performance**

**A. H. W. Beusen et al.**

*Correspondence to:* A. H. W. Beusen (arthur.beusen@pbl.nl)

- gmd-8-4045-2015-supplement-title-page.pdf
- GMD\_beusen\_supplement
  - EEA\_river\_plots.zip
  - GMDD\_beusen\_description\_of\_measurement\_data.docx
  - GMDD\_beusen\_supplement\_cover\_letter.docx
  - N\_model
    - \* trunk
  - P\_model
    - \* trunk
  - README.TXT
  - USGS\_comparison.zip
  - data\_all\_figures.xlsx
  - fix\_input
    - \* Bd-agg.map
    - \* Pcontent.asc
    - \* glwd
    - \* gnpp.asc
    - \* isric
    - \* litho
    - \* slope.map
    - \* soil\_shield
    - \* texture\_erosion.vat
  - generalcode
    - \* trunk

- output\_history\_110
- scen\_input
  - \* history\_110
- water\_input
  - \* pcrglobwb\_100

The copyright of individual parts of the supplement might differ from the CC-BY 3.0 licence.
